# Supplementary material for: Incidence, persistence, and clearance of cervical human papillomavirus infection among gynecological outpatients in Kunming, Yunnan, China, 2019–2023: a retrospective cohort study
Source: PeerJ. 2025 Nov 4;13:e20215. doi: 10.7717/peerj.20215 (PMC12593720; doi:10.7717/peerj.20215)
Supplement: Supplemental Information 2 [file peerj-13-20215-s002.xlsx]

## Sheet: HPV35
Patient ID	Patient Gender	Patient Age	Department	Test Date	Result	Barcode
0000050211	female	67	Gynecology	20240523	negative	1029692505
0000097323	female	52	Gynecology	20240626	negative	1030151101
0000097878	female	50	Reproductive Gynecology	20240723	negative	1030550584
0000098350	female	59	Gynecology	20240329	negative	1028958724
0000098556	female	61	Reproductive Gynecology	20240316	negative	1028783253
0000098602	female	59	Reproductive Gynecology	20240418	negative	1029223342
0000098618	female	44	Gynecology	20240209	negative	1028335468
0000099211	female	53	Gynecology	20240203	negative	1028277019
0000099345	female	50	Department of General Practice	20240410	negative	1029106252
0000099353	female	50	Gynecology	20240507	negative	1029445512
0000099674	female	50	Reproductive Gynecology	20240511	negative	1029525951
0000114847	female	65	Gynecology	20240103	negative	1027874477
0000114942	female	63	Gynecology	20240201	negative	1028252391
0000114996	female	58	Geriatrics Department Cadre Section	20240416	negative	1029180638
0000125261	female	45	Gynecology	20240223	negative	1028470565
0000381259	female	39	Gynecology	20240410	negative	1029109227
0000434761	female	38	Reproductive Gynecology	20240308	negative	1028669940
0000434781	female	38	Gynecology	20240621	negative	1030087644
0000434827	female	38	Gynecology	20240124	negative	1028147257
0000434983	female	43	Gynecology	20240403	negative	1029018959
0000776006	female	38	Gynecology	20240205	negative	1028292058
0101008775	female	57	Gynecology	20240130	negative	1028218185
0101026060	female	60	Reproductive Gynecology	20240309	negative	1028685981
0101026091	female	69	Gynecology	20240321	negative	1028845477
0101027628	female	62	Gynecology	20240724	positive	1030559951
0101030063	female	54	Gynecology	20240307	negative	1028645701
0101040844	female	45	Reproductive Gynecology	20240329	negative	1028957283
0101054805	female	52	Reproductive Gynecology	20240513	negative	1029532870
0101070584	female	48	Gynecology	20240514	negative	1029555991
0101088999	female	41	Gynecology	20240203	negative	1028278277
0101092307	female	40	Gynecology	20240525	negative	1029721391
0101104448	female	39	Reproductive Gynecology	20240412	negative	1029142135
0101113800	female	39	Gynecology	20240706	negative	1030296098
0101116101	female	77	Reproductive Gynecology	20240523	negative	1029695504
0101219269	female	54	Gynecology	20240424	negative	1029302729
0101220430	female	46	Gynecology	20240626	negative	1030150510
0101220962	female	54	Gynecology	20240424	negative	1029298015
0101222095	female	60	Gynecology	20240412	negative	1029143542
0101224417	female	40	Gynecology	20240530	negative	1029786516
0101252145	female	64	Reproductive Gynecology	20240724	negative	1030559695
0101295978	female	34	Gynecology	20240206	negative	1028310466
0101306158	female	36	Gynecology	20240417	negative	1029209179
0101307377	female	37	Gynecology	20240308	negative	1028668002
0101311794	female	36	Gynecology	20240626	negative	1030153168
0101322989	female	34	Reproductive Gynecology	20240402	negative	1029004708
0101325962	female	27	Gynecology	20240202	negative	1028254549
0102051777	female	75	Gynecology	20240423	negative	1029278234
0102051777	female	75	Gynecology	20240618	negative	1030031388
0102056297	female	53	Gynecology	20240730	negative	1030651951
0102057171	female	54	Gynecology	20240511	negative	1029525893
0102063908	female	60	Gynecology	20240601	negative	1029818847
0102063910	female	69	Gynecology	20240528	negative	1029759576
0102066214	female	78	Reproductive Gynecology	20240704	negative	1030269998
0102073941	female	76	Gynecology	20240316	negative	1028785927
0102133572	female	61	Gynecology	20240321	negative	1028846675
0102154885	female	56	Gynecology	20240430	negative	1029402564
0102161125	female	55	Gynecology	20240205	negative	1028298010
0102167450	female	45	Gynecology	20240125	negative	1028164030
0102177752	female	51	Gynecology	20240419	negative	1029238499
0102186699	female	43	Reproductive Gynecology	20240528	negative	1029750427
0102194443	female	50	Reproductive Gynecology	20240110	negative	1027957140
0102202421	female	46	Reproductive Gynecology	20240713	negative	1030404177
0102220064	female	54	Gynecology	20240712	negative	1030387900
0102230993	female	46	Gynecology	20240605	negative	1029868734
0102246050	female	41	Gynecology	20240712	negative	1030386163
0102259862	female	58	Gynecology	20240314	negative	1028748806
0102260785	female	40	Gynecology	20240626	negative	1030159113
0102271672	female	39	Gynecology	20240430	negative	1029389922
0102278435	female	40	Gynecology	20240313	negative	1028736237
0102284833	female	38	Gynecology	20240530	negative	1029786803
0102285174	female	45	Gynecology	20240321	negative	1028851856
0102289491	female	47	Gynecology	20240319	negative	1028808425
0102305018	female	37	Reproductive Gynecology	20240524	negative	1029704481
0102316917	female	45	Gynecology	20240327	negative	1028925204
0102502670	female	35	Reproductive Gynecology	20240727	negative	1030618098
0102502738	female	37	Gynecology	20240525	negative	1029723579
0102513320	female	36	Gynecology	20240103	negative	1027872497
0102523330	female	53	Gynecology	20240718	negative	1030477513
0102528558	female	34	Gynecology	20240419	negative	1029238973
0102532134	female	36	Reproductive Gynecology	20240529	negative	1029769386
0102548597	female	52	Gynecology	20240620	negative	1030070579
0102593853	female	34	Gynecology	20240614	negative	1029989822
0102594340	female	36	Gynecology	20240320	negative	1028828824
0102598254	female	40	Gynecology	20240703	negative	1030253334
0102629050	female	35	Reproductive Gynecology	20240221	negative	1028432999
0102645545	female	35	Reproductive Gynecology	20240321	negative	1028851581
0102662101	female	31	Gynecology	20240220	negative	1028426329
0102673423	female	29	Gynecology	20240502	negative	1029405770
0102686628	female	30	Reproductive Gynecology	20240105	negative	1027903674
0103002910	female	53	Reproductive Gynecology	20240130	negative	1028218403
0103006365	female	81	Gynecology	20240305	negative	1028617484
0103027005	female	51	Gynecology	20240229	negative	1028553443
0103032365	female	58	Gynecology	20240418	negative	1029220083
0103039935	female	60	Gynecology	20240525	negative	1029717684
0103044687	female	52	Gynecology	20240614	negative	1029987625
0103064269	female	51	Gynecology	20240517	negative	1029606766
0103076574	female	60	Gynecology	20240111	negative	1027978927
0103092404	female	72	Reproductive Gynecology	20240207	positive	1028319834
0103095581	female	69	Gynecology	20240219	negative	1028404490
0103101457	female	57	Gynecology	20240703	negative	1030245760
0103126669	female	59	Gynecology	20240124	negative	1028150086
0103128008	female	45	Gynecology	20240629	negative	1030203579
0103144528	female	46	Gynecology	20240328	negative	1028947314
0103146024	female	43	Gynecology	20240705	negative	1030285784
0103147123	female	43	Gynecology	20240702	negative	1030235667
0103148406	female	50	Gynecology	20240408	negative	1029076031
0103155924	female	37	Reproductive Gynecology	20240604	negative	1029849089
0103160828	female	38	Gynecology	20240420	negative	1029255961
0103174133	female	49	Reproductive Gynecology	20240613	negative	1029971212
0103198462	female	48	Gynecology	20240104	negative	1027886470
0103207709	female	41	Reproductive Gynecology	20240308	negative	1028670427
0103224092	female	50	Gynecology	20240730	negative	1030653730
0103233109	female	36	Gynecology	20240311	negative	1028691794
0103233600	female	55	Gynecology	20240319	negative	1028815530
0103251907	female	37	Gynecology	20240620	negative	1030073053
0103252879	female	41	Reproductive Gynecology	20240706	negative	1030298160
0103253487	female	35	Gynecology	20240123	negative	1028132209
0103287307	female	37	Gynecology	20240522	negative	1029675752
0103299017	female	35	Reproductive Gynecology	20240326	negative	1028905889
0103309048	female	35	Gynecology	20240314	negative	1028752959
0103310198	female	36	Gynecology	20240219	negative	1028393421
0103317453	female	41	Gynecology	20240703	negative	1030254205
0103323951	female	35	Reproductive Gynecology	20240229	negative	1028555940
0103323951	female	36	Reproductive Gynecology	20240625	negative	1030140136
0103324452	female	53	Reproductive Gynecology	20240430	negative	1029391313
0103328454	female	34	Reproductive Gynecology	20240525	negative	1029718703
0103332782	female	35	Reproductive Gynecology	20240628	negative	1030191614
0103333266	female	33	Gynecology	20240530	negative	1029784852
0103367493	female	33	Reproductive Gynecology	20240430	negative	1029399005
0103368401	female	40	Reproductive Gynecology	20240717	negative	1030459632
0103389423	female	32	Gynecology	20240221	negative	1028436943
0103401441	female	29	Reproductive Gynecology	20240401	negative	1028983380
0103403931	female	28	Gynecology	20240528	negative	1029746460
0111008314	female	87	Gynecology	20240725	negative	1030585007
0111008622	female	53	Gynecology	20240301	negative	1028562972
0111009559	female	57	Gynecology	20240511	negative	1029523546
0111048688	female	60		20240418	negative	1029219273
0111054550	female	50	Reproductive Gynecology	20240531	negative	1029800781
0111058199	female	77	Gynecology	20240130	negative	1028219845
0111086631	female	52	Gynecology	20240727	negative	1030612706
0111133570	female	54	Gynecology	20240529	negative	1029766872
0111142871	female	40	Gynecology	20240221	negative	1028432709
0111155616	female	42	Gynecology	20240418	negative	1029224232
0111157329	female	53	Gynecology	20240607	negative	1029896029
0111157652	female	43	Gynecology	20240316	negative	1028782601
0111169370	female	39	Gynecology	20240716	negative	1030440006
0111169380	female	40	Gynecology	20240528	negative	1029743878
0111187461	female	37	Reproductive Gynecology	20240412	negative	1029144132
0111187665	female	43	Gynecology	20240123	negative	1028127918
0111187670	female	38	Gynecology	20240229	negative	1028550989
0111199254	female	53	Gynecology	20240315	negative	1028764791
0111201898	female	40	Gynecology	20240612	negative	1029953839
0111203472	female	38	Gynecology	20240604	negative	1029842736
0111221756	female	41	Gynecology	20240104	negative	1027884948
0111226880	female	37	Reproductive Gynecology	20240530	negative	1029785147
0111226904	female	39	Gynecology	20240329	negative	1028962260
0111227021	female	36	Gynecology	20240423	negative	1029288132
0111236268	female	36	Reproductive Gynecology	20240511	negative	1029526122
0111239157	female	35	Gynecology	20240726	negative	1030604927
0111239227	female	33	Reproductive Gynecology	20240127	negative	1028189802
0111245613	female	35	Reproductive Gynecology	20240619	negative	1030045885
0111256289	female	36	Gynecology	20240308	negative	1028666760
0111256404	female	34	Reproductive Gynecology	20240509	negative	1029496143
0111272184	female	33	Reproductive Gynecology	20240507	negative	1029453404
0111272186	female	33	Gynecology	20240402	negative	1029009056
0111281328	female	30	Gynecology	20240222	negative	1028453914
0111281411	female	32	Gynecology	20240208	negative	1028328733
0111296169	female	29	Reproductive Gynecology	20240705	negative	1030285624
0112000864	female	51	Gynecology	20240716	negative	1030433834
0112009302	female	54	Reproductive Gynecology	20240116	negative	1028035781
0112130532	female	54	Gynecology	20240703	negative	1030244556
0112138735	female	51	Gynecology	20240411	negative	1029128949
0112138788	female	59	Gynecology	20240314	negative	1028744752
0112145548	female	47	Reproductive Gynecology	20240719	negative	1030493441
0112155256	female	51	Gynecology	20240419	negative	1029238505
0112164034	female	39	Gynecology	20240410	negative	1029102001
0112169777	female	37	Gynecology	20240424	negative	1029303043
0112300236	female	36	Gynecology	20240509	negative	1029489956
0112309058	female	46	Gynecology	20240720	negative	1030505136
0112341354	female	35	Gynecology	20240312	negative	1028712406
0112359748	female	34	Reproductive Gynecology	20240725	negative	1030582604
0112368452	female	32	Gynecology	20240205	negative	1028292572
0112372641	female	30	Reproductive Gynecology	20240402	negative	1029006539
0112372934	female	35	Gynecology	20240601	negative	1029814802
0112379647	female	29	Reproductive Gynecology	20240607	negative	1029904916
0112386624	female	27	Gynecology	20240710	negative	1030355476
0113020663	female	54	Reproductive Gynecology	20240105	negative	1027902545
0113387239	female	65	Gynecology	20240716	negative	1030440202
0113403606	female	36	Gynecology	20240727	negative	1030617297
0122029275	female	66	Gynecology	20240229	negative	1028549372
0122045343	female	32	Gynecology	20240229	negative	1028555750
0124000711	female	50	Gynecology	20240723	negative	1030547952
0124005628	female	53	Gynecology	20240312	negative	1028713065
0124014664	female	46	Reproductive Gynecology	20240530	negative	1029793222
0125011661	female	51	Gynecology	20240711	negative	1030362731
0125011739	female	45	Gynecology	20240717	negative	1030460913
0125020879	female	56	Reproductive Gynecology	20240719	negative	1030491873
0126000355	female	49	Gynecology	20240716	negative	1030434435
0126001367	female	46	Gynecology	20240219	negative	1028400964
0126011251	female	37	Reproductive Gynecology	20240725	negative	1030582376
0126156301	female	39	Gynecology	20240702	negative	1030233412
0127055610	female	47	Gynecology	20240711	negative	1030322965
0127055617	female	54	Gynecology	20240221	negative	1028439035
0127079110	female	45	Reproductive Gynecology	20240522	negative	1029671053
0128019301	female	43	Reproductive Gynecology	20240117	negative	1028049569
0129009586	female	46	Gynecology	20240725	negative	1030584935
0129009842	female	42	Gynecology	20240724	negative	1030567358
0129434904	female	38	Gynecology	20240116	negative	1028040253
0129436465	female	37	Gynecology	20240124	negative	1028150198
0153004549	female	49	Gynecology	20240131	negative	1028234932
0153017424	female	32	Gynecology	20240725	negative	1030587347
0153025120	female	35	Gynecology	20240702	negative	1030224921
0153029214	female	48	Gynecology	20240105	negative	1027896327
0153031630	female	45	Gynecology	20240403	negative	1029019794
0154000987	female	52	Reproductive Gynecology	20240710	negative	1030347030
0154049801	female	30	Gynecology	20240402	negative	1028997624
0155022473	female	33	Gynecology	20240327	negative	1028921576
0157000266	female	34	Reproductive Gynecology	20240727	negative	1030621710
1000001065	female	51	Gynecology	20240511	negative	1029527516
1000001102	female	44	Gynecology	20240205	negative	1028297635
1000001257	female	51	Reproductive Gynecology	20240518	negative	1029625331
1000001864	female	59	Gynecology	20240423	negative	1029277747
1000002453	female	58	Reproductive Gynecology	20240530	negative	1029789505
1000003437	female	31	Reproductive Gynecology	20240419	negative	1029237570
1000004073	female	32	Gynecology	20240724	negative	1030561120
1000006729	female	49	Reproductive Gynecology	20240515	negative	1029574175
1000011522	female	34	Gynecology	20240628	negative	1030187945
1000012798	female	41	Gynecology	20240418	negative	1029221198
1000013186	female	37	Gynecology	20240703	negative	1030249975
1000013792	female	35	Reproductive Gynecology	20240615	negative	1029999623
1000017341	female	55	Reproductive Gynecology	20240207	negative	1028321497
1000018672	female	28	Gynecology	20240518	negative	1029624479
1000019418	female	54	Gynecology	20240516	negative	1029590810
1000020481	female	43	Reproductive Gynecology	20240403	negative	1029021647
1000020504	female	32	Gynecology	20240604	negative	1029843624
1000021858	female	49	Reproductive Gynecology	20240123	negative	1028129122
1000022220	female	51	Gynecology	20240322	negative	1028859414
1000022484	female	37	Gynecology	20240724	negative	1030570749
1000023106	female	36	Gynecology	20240116	negative	1028039964
1000023351	female	38	Reproductive Gynecology	20240525	negative	1029717536
1000023416	female	43	Gynecology	20240702	negative	1030230630
1000023532	female	30	Reproductive Gynecology	20240720	negative	1030512252
1000026729	female	43	Gynecology	20240305	negative	1028609053
1000026729	female	43	Gynecology	20240618	negative	1030030055
1000027578	female	35	Gynecology	20240529	negative	1029775442
1000028273	female	67	Gynecology	20240702	negative	1030237038
1000030492	female	32	Gynecology	20240425	negative	1029322044
1000032435	female	49	Gynecology	20240509	negative	1029493030
1000032754	female	54	Gynecology	20240523	negative	1029689018
1000033917	female	29	Gynecology	20240111	negative	1027977064
1000034072	female	35	Reproductive Gynecology	20240320	negative	1028829914
1000035927	female	36	Gynecology	20240521	negative	1029660257
1000036758	female	45	Gynecology	20240220	negative	1028414448
1000037524	female	33	Reproductive Gynecology	20240422	negative	1029263269
1000037639	female	67	Gynecology	20240730	negative	1030656124
1000037855	female	40	Reproductive Gynecology	20240417	negative	1029204163
1000039814	female	48	Gynecology	20240413	negative	1029150259
1000039895	female	47	Gynecology	20240319	negative	1028807177
1000040672	female	46	Gynecology	20240202	negative	1028261096
1000041351	female	38	Gynecology	20240408	negative	1029075086
1000044116	female	48	Gynecology	20240605	negative	1029868941
1000047319	female	48	Gynecology	20240708	negative	1030306081
1000047801	female	31	Gynecology	20240725	negative	1030586661
1000047967	female	45	Gynecology	20240218	negative	1028380258
1000054395	female	34	Gynecology	20240109	negative	1027946450
1000055901	female	41	Gynecology	20240417	negative	1029204389
1000056147	female	40	Gynecology	20240316	negative	1028782031
1000056265	female	51	Gynecology	20240203	negative	1028277618
1000057481	female	38	Reproductive Gynecology	20240329	negative	1028962048
1000058141	female	43	Reproductive Gynecology	20240223	negative	1028474665
1000058171	female	36	Gynecology	20240321	negative	1028841571
1000059710	female	33	Gynecology	20240511	negative	1029520474
1000060287	female	33	Gynecology	20240613	negative	1029963522
1000061337	female	33	Gynecology	20240118	negative	1028065278
1000064534	female	30	Gynecology	20240703	negative	1030255020
1000068128	female	45	Gynecology	20240221	negative	1028433800
1000071015	female	53	Reproductive Gynecology	20240716	negative	1030434351
1000072153	female	32	Reproductive Gynecology	20240527	negative	1029733375
1000072411	female	39	Reproductive Gynecology	20240517	negative	1029607483
1000072833	female	56	Gynecology	20240110	negative	1027955494
1000073398	female	31	Reproductive Gynecology	20240127	negative	1028189119
1000074674	female	34	Gynecology	20240724	negative	1030566867
1000078805	female	56	Reproductive Gynecology	20240111	negative	1027973213
1000079236	female	47	Gynecology	20240527	negative	1029731528
1000079724	female	53	Gynecology	20240326	negative	1028903404
1000080287	female	43	Gynecology	20240726	negative	1030605810
1000083720	female	40	Reproductive Gynecology	20240326	negative	1028913838
1000084293	female	52	Gynecology	20240530	negative	1029791704
1000084772	female	49	Gynecology	20240730	negative	1030657621
1000085211	female	30	Gynecology	20240430	negative	1029398530
1000086821	female	35	Reproductive Gynecology	20240302	negative	1028582958
1000086871	female	54	Gynecology	20240515	negative	1029580736
1000086917	female	40	Reproductive Gynecology	20240320	negative	1028825564
1000086950	female	44	Gynecology	20240614	negative	1029988013
1000087351	female	40	Gynecology	20240329	negative	1028963578
1000087819	female	35	Gynecology	20240427	negative	1029346333
1000088213	female	54	Gynecology	20240529	negative	1029775865
1000088700	female	64	Gynecology	20240720	negative	1030502904
1000088804	female	56	Gynecology	20240529	negative	1029775255
1000089721	female	37	Gynecology	20240704	negative	1030267663
1000091216	female	48	Gynecology	20240220	negative	1028418857
1000091400	female	49	Reproductive Gynecology	20240116	negative	1028039568
1000094805	female	34	Gynecology	20240730	negative	1030654275
1000100545	female	38	Gynecology	20240430	negative	1029391265
1000101070	female	26	Gynecology	20240523	negative	1029689820
1000104596	female	42	Gynecology	20240705	negative	1030279300
1000105245	female	36	Gynecology	20240430	negative	1029391218
1000105892	female	47	Gynecology	20240412	negative	1029144134
1000105956	female	27	Reproductive Gynecology	20240311	negative	1028695421
1000108346	female	30	Gynecology	20240305	negative	1028619202
1000109674	female	36	Gynecology	20240510	negative	1029509117
1000109860	female	51	Gynecology	20240219	negative	1028406778
1000113079	female	45	Reproductive Gynecology	20240619	negative	1030051463
1000114523	female	42	Gynecology	20240717	negative	1030446185
1000115242	female	36	Gynecology	20240206	negative	1028307404
1000116263	female	50	Gynecology	20240508	negative	1029470812
1000116646	female	42	Gynecology	20240627	negative	1030171561
1000116736	female	39	Reproductive Gynecology	20240510	negative	1029508634
1000117533	female	36	Reproductive Gynecology	20240307	negative	1028655842
1000117799	female	32	Reproductive Gynecology	20240126	negative	1028179169
1000118027	female	42	Gynecology	20240111	negative	1027973737
1000119846	female	45	Gynecology	20240413	negative	1029154240
1000120332	female	38	Reproductive Gynecology	20240731	negative	1030676054
1000120342	female	34	Reproductive Gynecology	20240330	negative	1028975473
1000122395	female	44	Gynecology	20240424	negative	1029306316
1000122696	female	43	Gynecology	20240103	negative	1027866949
1000123045	female	30	Gynecology	20240123	negative	1028125482
1000124006	female	43	Gynecology	20240524	negative	1029710609
1000124795	female	55	Gynecology	20240405	negative	1029032423
1000125076	female	66	Reproductive Gynecology	20240626	negative	1030156129
1000125964	female	62	Gynecology	20240704	negative	1030268289
1000126757	female	41	Gynecology	20240426	negative	1029334392
1000129747	男	46	Department of Breast and Thyroid Surgery	20240507	negative	1029459855
1000132024	female	57	Reproductive Gynecology	20240724	negative	1030568953
1000135628	female	48	Gynecology	20240605	negative	1029873459
1000135798	female	74	Gynecology	20240731	negative	1030671903
1000135991	female	59	Reproductive Gynecology	20240315	negative	1028762680
1000136163	female	29	Reproductive Gynecology	20240323	negative	1028876031
1000136339	female	29	Gynecology	20240620	negative	1030068238
1000136784	female	37	Gynecology	20240417	negative	1029206610
1000137198	female	50	Reproductive Gynecology	20240710	negative	1030349531
1000145260	female	52	Gynecology	20240222	negative	1028457028
1000145368	female	35	Reproductive Gynecology	20240408	negative	1029072068
1000146218	female	37	Gynecology	20240726	negative	1030600425
1000147246	female	34	Reproductive Gynecology	20240627	negative	1030173537
1000147744	female	53	Gynecology	20240104	negative	1027886045
1000148320	female	41	Gynecology	20240308	negative	1028668470
1000148484	female	37	Reproductive Gynecology	20240111	negative	1027979154
1000150840	female	53	Gynecology	20240410	negative	1029108875
1000151775	female	48	Gynecology	20240202	negative	1028267253
1000152015	female	40	Gynecology	20240425	negative	1029320302
1000153208	female	36	Reproductive Gynecology	20240419	negative	1029240474
1000155137	female	30	Gynecology	20240325	negative	1028890722
1000155882	female	27	Gynecology	20240220	negative	1028422305
1000156436	female	36	Reproductive Gynecology	20240703	negative	1030248153
1000156620	female	57	Gynecology	20240508	negative	1029473067
1000157506	female	55	Gynecology	20240511	negative	1029526441
1000160212	female	47	Gynecology	20240516	negative	1029587653
1000161354	female	46	Gynecology	20240621	negative	1030087112
1000169771	female	49	Gynecology	20240425	negative	1029318672
1000170921	female	51	Gynecology	20240312	negative	1028714570
1000173410	female	51	Gynecology	20240717	negative	1030458162
1000174678	female	37	Gynecology	20240723	negative	1030543874
1000175796	female	34	Gynecology	20240607	negative	1029904480
1000177395	female	44	Reproductive Gynecology	20240528	negative	1029754425
1000177584	female	26	Reproductive Gynecology	20240330	negative	1028974149
1000178290	female	48	Gynecology	20240326	negative	1028910066
1000181975	female	45	Gynecology	20240402	negative	1028999752
1000186346	female	48	Gynecology	20240313	negative	1028734080
1000186901	female	30	Gynecology	20240124	negative	1028144435
1000188859	female	34	Gynecology	20240513	negative	1029537833
1000190644	female	42	Gynecology	20240403	negative	1029018459
1000192925	female	47	Pain Management Department	20240206	negative	1028310696
1000192955	female	41	Gynecology	20240718	negative	1030476610
1000194903	female	45	Gynecology	20240718	negative	1030477824
1000195181	female	45	Reproductive Gynecology	20240112	negative	1027991380
1000195750	female	46	Gynecology	20240719	negative	1030494704
1000195981	female	47	Gynecology	20240313	negative	1028736150
1000197253	female	40	Gynecology	20240725	negative	1030588269
1000198110	female	33	Gynecology	20240528	negative	1029756481
1000198308	female	42	Gynecology	20240510	negative	1029511523
1000200025	female	39	Gynecology	20240327	negative	1028931961
1000200430	female	44	Gynecology	20240410	negative	1029107103
1000202116	female	45	Gynecology	20240130	negative	1028222303
1000203203	female	34	Reproductive Gynecology	20240315	negative	1028761771
1000204710	female	59	Reproductive Gynecology	20240619	negative	1030050783
1000207301	female	58	Gynecology	20240326	negative	1028914019
1000208429	female	36	Gynecology	20240725	negative	1030585104
1000208779	female	35	Gynecology	20240517	negative	1029612871
1000209181	female	31	Gynecology	20240405	negative	1029038998
1000209410	female	41	Gynecology	20240301	negative	1028568195
1000212058	female	48	Gynecology	20240514	negative	1029558734
1000212656	female	27	Gynecology	20240510	negative	1029511504
1000213635	female	46	Gynecology	20240326	negative	1028906993
1000214667	female	55	Gynecology	20240509	negative	1029485449
1000217590	female	34	Gynecology	20240314	negative	1028753444
1000217725	female	51	Gynecology	20240427	negative	1029349871
1000219433	female	36	Reproductive Gynecology	20240613	negative	1029969846
1000222034	female	57	Gynecology	20240312	negative	1028705221
1000222313	female	51	Reproductive Gynecology	20240103	negative	1027871960
1000222563	female	44	Reproductive Gynecology	20240717	negative	1030458490
1000223995	female	36	Gynecology	20240720	negative	1030511907
1000224941	female	37	Reproductive Gynecology	20240518	negative	1029622576
1000224980	female	40	Gynecology	20240412	negative	1029138422
1000225072	female	37	Reproductive Gynecology	20240305	negative	1028613809
1000228451	female	52	Gynecology	20240607	negative	1029903846
1000229112	female	41	Reproductive Gynecology	20240621	negative	1030089064
1000229929	female	34	Reproductive Gynecology	20240621	negative	1030084554
1000232053	female	31	Gynecology	20240531	negative	1029799238
1000232200	female	49	Gynecology	20240417	positive	1029205199
1000234480	female	50	Gynecology	20240430	negative	1029397332
1000237365	female	47	Gynecology	20240702	negative	1030237323
1000240108	female	58	Gynecology	20240424	negative	1029301790
1000240755	female	29	Reproductive Gynecology	20240729	negative	1030630428
1000244871	female	44	Gynecology	20240430	negative	1029398470
1000246006	female	46	Gynecology	20240723	negative	1030550390
1000247017	female	27	Gynecology	20240229	negative	1028555098
1000247341	female	40	Gynecology	20240112	negative	1027990589
1000248062	female	39	Gynecology	20240621	negative	1030085151
1000250263	female	46	Gynecology	20240726	negative	1030603575
1000250859	female	35	Gynecology	20240112	negative	1027992078
1000252005	female	46	Gynecology	20240508	negative	1029467129
1000252267	female	41	Gynecology	20240716	negative	1030425920
1000252713	female	34	Gynecology	20240419	negative	1029237394
1000253986	female	52	Gynecology	20240219	negative	1028405032
1000254414	female	46	Gynecology	20240329	negative	1028962564
1000254638	female	41	Reproductive Gynecology	20240525	negative	1029723048
1000256864	female	31	Reproductive Gynecology	20240330	negative	1028977642
1000258310	female	45	Gynecology	20240329	negative	1028963161
1000259093	female	60	Gynecology	20240621	negative	1030091047
1000259921	female	30	Reproductive Gynecology	20240403	negative	1029017903
1000261671	female	45	Gynecology	20240717	negative	1030458911
1000261815	female	37	Gynecology	20240126	negative	1028171088
1000262065	female	40	Reproductive Gynecology	20240117	negative	1028048917
1000262798	female	28	Reproductive Gynecology	20240528	negative	1029757236
1000263356	female	54	Reproductive Gynecology	20240517	negative	1029606129
1000263988	female	36	Gynecology	20240709	negative	1030322614
1000264868	female	32	Gynecology	20240330	negative	1028970131
1000266088	female	54	Gynecology	20240508	negative	1029477573
1000271061	female	51	Gynecology	20240710	negative	1030353093
1000271208	female	28	Reproductive Gynecology	20240723	negative	1030543818
1000273532	female	51	Gynecology	20240202	negative	1028260278
1000275174	female	83	Gynecology	20240508	negative	1029474979
1000279488	female	35	Reproductive Gynecology	20240502	negative	1029405035
1000279693	female	52	Gynecology	20240224	negative	1028489404
1000280412	female	27	Reproductive Gynecology	20240425	negative	1029323571
1000283186	female	37	Gynecology	20240727	negative	1030622963
1000284730	female	40	Medical Oncology Department	20240124	negative	1028146888
1000284989	female	39	Reproductive Gynecology	20240229	negative	1028550972
1000285732	female	64	Gynecology	20240323	negative	1028875402
1000287291	female	29	Reproductive Gynecology	20240326	negative	1028908195
1000289401	female	44	Gynecology	20240319	negative	1028815565
1000292241	female	51	Gynecology	20240531	negative	1029803532
1000295165	female	33	Reproductive Gynecology	20240320	negative	1028833563
1000301354	female	38	Gynecology	20240131	negative	1028238561
1000302680	female	35	Gynecology	20240123	negative	1028131179
1000303182	female	53	Gynecology	20240219	negative	1028405674
1000304171	female	28	Gynecology	20240509	negative	1029494500
1000304848	female	46	Gynecology	20240328	negative	1028943572
1000308120	female	39	Gynecology	20240315	negative	1028761107
1000308370	female	29	Gynecology	20240608	negative	1029918742
1000310834	female	54	Reproductive Gynecology	20240410	negative	1029102301
1000311848	female	45	Reproductive Gynecology	20240425	negative	1029322107
1000312878	female	47	Gynecology	20240207	negative	1028317686
1000313842	female	58	Gynecology	20240306	negative	1028633482
1000316592	female	30	Gynecology	20240312	negative	1028710942
1000321118	female	54	Gynecology	20240517	negative	1029614424
1000321270	female	42	Gynecology	20240329	negative	1028956515
1000324299	female	48	Reproductive Gynecology	20240424	negative	1029299326
1000324875	female	68	Gynecology	20240727	negative	1030620176
1000330222	female	42	Gynecology	20240307	negative	1028647144
1000330932	female	81	Gynecology	20240228	negative	1028537147
1000331779	female	59	Gynecology	20240619	negative	1030059131
1000332124	female	37	Gynecology	20240615	negative	1030006287
1000334591	female	31	Reproductive Gynecology	20240205	negative	1028296749
1000334670	female	31	Gynecology	20240515	negative	1029582983
1000335261	female	60	Gynecology	20240326	negative	1028912597
1000337112	female	34	Gynecology	20240719	negative	1030492037
1000338314	female	33	Gynecology	20240104	negative	1027883097
1000338718	female	41	Gynecology	20240702	negative	1030227311
1000340155	female	57	Gynecology	20240308	negative	1028664501
1000340231	female	43	Gynecology	20240402	negative	1028997162
1000340349	female	30	Reproductive Gynecology	20240507	negative	1029458850
1000340526	female	33	Reproductive Gynecology	20240131	negative	1028238207
1000341466	female	29	Gynecology	20240620	negative	1030073057
1000342288	female	30	Gynecology	20240326	negative	1028901393
1000342384	female	32	Gynecology	20240320	negative	1028824265
1000342932	female	34	Gynecology	20240605	negative	1029869836
1000343611	female	29	Reproductive Gynecology	20240123	negative	1028131113
1000343657	female	71	Reproductive Gynecology	20240313	negative	1028737938
1000346883	female	51	Reproductive Gynecology	20240717	negative	1030459307
1000347482	female	27	Gynecology	20240202	negative	1028262959
1000347811	female	41	Gynecology	20240606	negative	1029878234
1000348761	female	47	Gynecology	20240130	negative	1028214908
1000349091	female	47	Gynecology	20240725	negative	1030580870
1000349580	female	62	Proctology Department	20240621	negative	1030088121
1000350386	female	42	Gynecology	20240326	negative	1028902276
1000350548	female	35	Gynecology	20240315	negative	1028767442
1000353607	female	30	Reproductive Gynecology	20240220	negative	1028419771
1000354209	female	41	Gynecology	20240403	negative	1029021070
1000357511	female	35	Gynecology	20240423	negative	1029288388
1000357654	female	50	Gynecology	20240111	negative	1027970342
1000357658	female	30	Gynecology	20240711	negative	1030361589
1000358702	female	29	Gynecology	20240410	negative	1029105108
1000358819	female	30	Gynecology	20240118	negative	1028067885
1000359088	female	50	Reproductive Gynecology	20240612	negative	1029955856
1000359691	female	46	Reproductive Gynecology	20240430	negative	1029388270
1000360388	female	31	Reproductive Gynecology	20240727	negative	1030615907
1000360916	female	38	Gynecology	20240209	negative	1028337182
1000361121	female	44	Gynecology	20240413	negative	1029158839
1000361156	female	39	Reproductive Gynecology	20240705	negative	1030277864
1000361761	female	39	Gynecology	20240718	negative	1030476433
1000361761	female	39	Reproductive Gynecology	20240507	negative	1029459277
1000361834	female	46	Gynecology	20240719	negative	1030496428
1000363342	female	46	Reproductive Gynecology	20240409	negative	1029095068
1000364087	female	40	Reproductive Gynecology	20240711	negative	1030371207
1000364743	female	39	Gynecology	20240410	negative	1029107437
1000365273	female	35	Gynecology	20240323	negative	1028874573
1000365313	female	27	Gynecology	20240307	negative	1028648173
1000366156	female	25	Gynecology	20240309	negative	1028685385
1000369180	female	47	Gynecology	20240221	negative	1028435347
1000372891	female	42	Gynecology	20240112	negative	1027990595
1000373691	female	53	Gynecology	20240423	negative	1029287147
1000376283	female	37	Gynecology	20240604	negative	1029843694
1000376379	female	51	Gynecology	20240522	negative	1029671931
1000376443	female	65	Gynecology	20240731	negative	1030675015
1000377322	female	35	Gynecology	20240522	negative	1029675213
1000377772	female	40	Reproductive Gynecology	20240621	negative	1030087960
1000379189	female	41	Reproductive Gynecology	20240112	negative	1027988223
1000379203	female	39	Gynecology	20240308	negative	1028666254
1000379303	female	27	Gynecology	20240313	negative	1028733880
1000379772	female	41	Gynecology	20240228	negative	1028537318
1000382331	female	60	Gynecology	20240502	negative	1029403221
1000384693	female	54	Gynecology	20240510	negative	1029510510
1000385576	female	43	Gynecology	20240509	negative	1029495853
1000386279	female	39	Gynecology	20240507	negative	1029446358
1000388367	female	35	Gynecology	20240620	negative	1030071206
1000389700	female	58	Gynecology	20240429	negative	1029367591
1000391290	female	42	Gynecology	20240626	negative	1030159305
1000395242	female	36	Gynecology	20240516	negative	1029596843
1000397269	female	37	Gynecology	20240424	negative	1029303048
1000399630	female	42	Reproductive Gynecology	20240710	positive	1030351218
1000401580	female	41	Gynecology	20240412	negative	1029142262
1000404914	female	59	Gynecology	20240508	negative	1029475866
1000404942	female	33	Gynecology	20240717	negative	1030455865
1000406676	female	29	Gynecology	20240224	negative	1028490549
1000407985	female	46	Gynecology	20240702	negative	1030237759
1000410069	female	33	Gynecology	20240222	negative	1028450634
1000411556	female	47	Reproductive Gynecology	20240103	negative	1027869118
1000413860	female	31	Gynecology	20240227	negative	1028520854
1000416674	female	63	Reproductive Gynecology	20240313	negative	1028734936
1000418217	female	52	Gynecology	20240319	negative	1028817888
1000418527	female	52	Gynecology	20240625	negative	1030133733
1000421344	female	36	Gynecology	20240628	negative	1030191180
1000421865	female	37	Gynecology	20240328	negative	1028938608
1000421865	female	37	Gynecology	20240716	negative	1030438502
1000421993	female	50	Reproductive Gynecology	20240613	negative	1029971507
1000422181	female	44	Gynecology	20240221	negative	1028437876
1000424468	female	46	Gynecology	20240731	negative	1030672779
1000425231	female	53	Gynecology	20240329	negative	1028958523
1000425280	female	33	Gynecology	20240507	negative	1029442487
1000425898	female	46	Gynecology	20240329	negative	1028960588
1000427749	female	44	Gynecology	20240725	negative	1030582640
1000431569	female	31	Reproductive Gynecology	20240704	negative	1030268414
1000434261	female	31	Gynecology	20240627	negative	1030166347
1000434686	female	44	Reproductive Gynecology	20240408	negative	1029069162
1000435651	female	42	Gynecology	20240709	negative	1030327909
1000436585	female	48	Gynecology	20240509	negative	1029486640
1000438486	female	36	Gynecology	20240126	negative	1028174276
1000440448	female	34	Reproductive Gynecology	20240730	negative	1030651021
1000441332	female	44	Gynecology	20240410	negative	1029111072
1000443948	female	52	Gynecology	20240615	negative	1030002091
1000444091	female	57	Gynecology	20240329	negative	1028954139
1000446030	female	48	Gynecology	20240416	negative	1029189851
1000446785	female	45	Gynecology	20240524	negative	1029709589
1000448853	female	55	Gynecology	20240410	negative	1029104876
1000450131	female	45	Gynecology	20240410	negative	1029112689
1000453412	female	34	Reproductive Gynecology	20240612	negative	1029954566
1000453659	female	32	Gynecology	20240411	negative	1029121212
1000455864	female	43	Gynecology	20240111	negative	1027978367
1000455933	female	55	Gynecology	20240223	negative	1028469943
1000456317	female	38	Gynecology	20240315	negative	1028760835
1000457967	female	53	Gynecology	20240319	negative	1028809945
1000458027	female	55	Gynecology	20240612	negative	1029945035
1000459600	female	47	Gynecology	20240612	negative	1029946308
1000459749	female	45	Gynecology	20240724	negative	1030569998
1000469691	female	48	Gynecology	20240629	positive	1030203874
1000469869	female	45	Gynecology	20240410	negative	1029104711
1000471950	female	34	Gynecology	20240409	negative	1029089911
1000473167	female	32	Gynecology	20240405	negative	1029039855
1000475426	female	41	Gynecology	20240209	negative	1028334915
1000479004	female	37	Reproductive Gynecology	20240619	negative	1030051183
1000479532	female	39	Gynecology	20240508	negative	1029478524
1000480887	female	46	Reproductive Gynecology	20240524	negative	1029705087
1000481864	female	32	Gynecology	20240508	negative	1029471379
1000482710	female	41	Gynecology	20240627	negative	1030176481
1000484413	female	68	Gynecology	20240229	negative	1028553690
1000486539	female	32	Gynecology	20240417	negative	1029202771
1000486649	female	44	Gynecology	20240323	negative	1028883176
1000486916	female	51	Gynecology	20240513	negative	1029538789
1000488139	female	37	Gynecology	20240706	negative	1030294564
1000488480	female	34	Gynecology	20240206	negative	1028308604
1000489626	female	35	Reproductive Gynecology	20240405	negative	1029036551
1000490637	female	57	Reproductive Gynecology	20240224	negative	1028483794
1000493092	female	30	Gynecology	20240228	negative	1028532292
1000496678	female	31	Gynecology	20240713	negative	1030402892
1000497079	female	45	Gynecology	20240418	negative	1029222086
1000498173	female	42	Gynecology	20240731	negative	1030672861
1000498179	female	50	Gynecology	20240112	negative	1027988204
1000500078	female	38	Gynecology	20240523	negative	1029685626
1000500353	female	46	Gynecology	20240626	negative	1030158676
1000503926	female	48	Reproductive Gynecology	20240528	negative	1029755154
1000506570	female	43	Gynecology	20240201	negative	1028244210
1000506840	female	55	Gynecology	20240326	negative	1028901530
1000508079	female	32	Reproductive Gynecology	20240416	negative	1029191568
1000508542	female	43	Gynecology	20240724	negative	1030567064
1000510220	female	46	Gynecology	20240426	negative	1029337291
1000512545	female	54	Gynecology	20240315	negative	1028769329
1000512545	female	55	Gynecology	20240424	negative	1029306493
1000514731	female	64	Gynecology	20240731	negative	1030672522
1000515039	female	44	Gynecology	20240408	negative	1029075704
1000515590	female	40	Reproductive Gynecology	20240203	negative	1028279732
1000516740	female	35	Gynecology	20240313	negative	1028736007
1000517301	female	36	Gynecology	20240104	negative	1027886763
1000517653	female	45	Gynecology	20240228	negative	1028535821
1000518565	female	28	Gynecology	20240417	negative	1029208490
1000519657	female	45	Gynecology	20240203	negative	1028278439
1000520947	female	33	Gynecology	20240725	negative	1030582019
1000521985	female	43	Reproductive Gynecology	20240604	negative	1029844676
1000523213	female	26	Gynecology	20240423	negative	1029283349
1000526384	female	45	Gynecology	20240330	negative	1028975240
1000527405	female	37	Reproductive Gynecology	20240314	negative	1028754230
1000527638	female	40	Gynecology	20240309	negative	1028678086
1000530621	female	50	Gynecology	20240126	negative	1028178958
1000532100	female	54	Gynecology	20240228	negative	1028539299
1000532502	female	40	Gynecology	20240322	negative	1028864687
1000532529	female	50	Gynecology	20240523	negative	1029688587
1000535010	female	29	Reproductive Gynecology	20240307	negative	1028652623
1000538170	female	29	Reproductive Gynecology	20240207	negative	1028318382
1000538371	female	45	Gynecology	20240417	negative	1029208332
1000539196	female	24	Gynecology	20240531	negative	1029800834
1000540759	female	41	Gynecology	20240619	negative	1030059539
1000541344	female	45	Reproductive Gynecology	20240521	negative	1029656189
1000543709	female	32	Gynecology	20240618	negative	1030037979
1000544573	female	29	Reproductive Gynecology	20240326	negative	1028912639
1000545388	female	26	Gynecology	20240202	negative	1028262359
1000545428	female	54	Gynecology	20240320	negative	1028836862
1000547506	female	30	Gynecology	20240221	negative	1028443459
1000551326	female	56	Gynecology	20240104	negative	1027884362
1000551326	female	56	Gynecology	20240427	negative	1029348151
1000554184	female	47	Reproductive Gynecology	20240131	negative	1028230388
1000554292	female	29	Reproductive Gynecology	20240307	negative	1028653169
1000554781	female	33	Reproductive Gynecology	20240627	negative	1030176743
1000556679	female	28	Reproductive Gynecology	20240706	negative	1030299150
1000556814	female	42	Reproductive Gynecology	20240528	negative	1029758048
1000560511	female	45	Gynecology	20240510	negative	1029506046
1000561057	female	39	Gynecology	20240327	negative	1028929733
1000563720	female	40	Gynecology	20240429	negative	1029371601
1000565879	female	43	Gynecology	20240724	negative	1030556916
1000568351	female	61	Gynecology	20240429	negative	1029366074
1000570246	female	57	Gynecology	20240605	negative	1029871473
1000571402	female	45	Gynecology	20240725	negative	1030589060
1000571660	female	34	Reproductive Gynecology	20240319	negative	1028811675
1000574895	female	24	Reproductive Gynecology	20240322	negative	1028860304
1000575432	female	49	Gynecology	20240403	negative	1029022809
1000576158	female	37	Gynecology	20240411	negative	1029129020
1000576561	female	37	Reproductive Gynecology	20240412	negative	1029139664
1000578048	female	39	Gynecology	20240719	negative	1030494703
1000586512	female	31	Reproductive Gynecology	20240731	negative	1030672345
1000587110	female	31	Reproductive Gynecology	20240628	negative	1030187988
1000589065	female	41	Gynecology	20240515	negative	1029577292
1000589574	female	45	Gynecology	20240312	negative	1028716709
1000591488	female	52	Gynecology	20240202	negative	1028264461
1000592668	female	30	Reproductive Gynecology	20240203	negative	1028279508
1000593994	female	43	Gynecology	20240723	negative	1030548936
1000596063	female	47	Reproductive Gynecology	20240626	negative	1030156212
1000597823	female	41	Gynecology	20240229	negative	1028548745
1000599183	female	47	Reproductive Gynecology	20240120	negative	1028101049
1000602230	female	24	Gynecology	20240514	negative	1029564452
1000603762	female	45	Gynecology	20240130	negative	1028219555
1000604076	female	47	Reproductive Gynecology	20240717	negative	1030461065
1000604934	female	36	Gynecology	20240621	negative	1030089510
1000611968	female	53	Gynecology	20240316	negative	1028784088
1000612477	female	38	Gynecology	20240103	negative	1027871856
1000617716	female	47	Gynecology	20240718	negative	1030478962
1000619505	female	39	Gynecology	20240328	negative	1028942256
1000620000	female	34	Gynecology	20240726	negative	1030604225
1000620058	female	36	Gynecology	20240711	negative	1030364783
1000620414	female	30	Gynecology	20240305	negative	1028610931
1000622389	female	37	Gynecology	20240524	negative	1029705578
1000624295	female	32	Gynecology	20240419	negative	1029234097
1000624474	female	46	Gynecology	20240608	negative	1029913190
1000624983	female	28	Gynecology	20240305	negative	1028619843
1000626255	female	38	Gynecology	20240513	negative	1029535223
1000626543	female	34	Reproductive Gynecology	20240430	negative	1029398095
1000627270	female	47	Gynecology	20240507	negative	1029449372
1000627810	female	35	Gynecology	20240730	negative	1030655564
1000628428	female	23	Gynecology	20240329	negative	1028963765
1000629223	female	36	Gynecology	20240620	negative	1030070743
1000631178	female	37	Reproductive Gynecology	20240319	negative	1028810138
1000632581	female	42	Gynecology	20240120	negative	1028099401
1000632670	female	33	Reproductive Gynecology	20240105	negative	1027899910
1000634097	female	52	Reproductive Gynecology	20240530	negative	1029791547
1000634284	female	49	Gynecology	20240529	negative	1029773005
1000637330	female	35	Gynecology	20240221	negative	1028440490
1000640216	female	41	Reproductive Gynecology	20240710	negative	1030352982
1000640785	female	58	Gynecology	20240606	negative	1029885676
1000642026	female	28	Reproductive Gynecology	20240319	negative	1028817031
1000642876	female	32	Reproductive Gynecology	20240307	negative	1028656363
1000651412	female	33	Reproductive Gynecology	20240323	negative	1028876199
1000654409	female	38	Reproductive Gynecology	20240717	negative	1030458798
1000655653	female	36	Gynecology	20240612	negative	1029954031
1000655801	female	53	Gynecology	20240117	negative	1028051382
1000656910	female	35	Gynecology	20240430	negative	1029388274
1000658158	female	34	Gynecology	20240327	negative	1028930754
1000658449	female	44	Gynecology	20240513	negative	1029535881
1000658764	female	43	Gynecology	20240424	negative	1029300549
1000663428	female	34	Reproductive Gynecology	20240408	negative	1029069578
1000664045	female	32	Gynecology	20240320	negative	1028832473
1000664593	female	29	Gynecology	20240203	negative	1028280229
1000665358	female	48	Gynecology	20240305	negative	1028620598
1000665575	female	32	Gynecology	20240411	negative	1029128062
1000666217	female	32	Reproductive Gynecology	20240110	negative	1027961587
1000667161	female	54	Gynecology	20240227	negative	1028512611
1000667619	female	55	Gynecology	20240704	negative	1030267322
1000671689	female	24	Gynecology	20240322	negative	1028862084
1000671848	female	44	Reproductive Gynecology	20240723	negative	1030549736
1000672259	female	33	Reproductive Gynecology	20240320	negative	1028829909
1000676515	female	42	Gynecology	20240509	negative	1029495922
1000678602	female	51	Reproductive Gynecology	20240403	negative	1029018609
1000683060	female	44	Gynecology	20240327	negative	1028925940
1000687341	female	28	Gynecology	20240524	negative	1029703978
1000690141	female	34	Gynecology	20240605	negative	1029871784
1000694491	female	29	Reproductive Gynecology	20240611	negative	1029927719
1000695591	female	34	Gynecology	20240209	negative	1028336406
1000701319	female	51	Gynecology	20240727	negative	1030621174
1000701636	female	43	Gynecology	20240417	negative	1029209616
1000705706	female	55	Reproductive Gynecology	20240619	negative	1030055472
1000705742	female	37	Reproductive Gynecology	20240418	negative	1029224828
1000708670	female	41	Gynecology	20240301	negative	1028565533
1000708670	female	42	Gynecology	20240712	negative	1030383561
1000708881	female	34	Gynecology	20240604	negative	1029854319
1000710066	female	28	Gynecology	20240308	negative	1028664746
1000710204	female	42	Gynecology	20240205	negative	1028295623
1000710288	female	55	Reproductive Gynecology	20240528	negative	1029756427
1000713643	female	43	Gynecology	20240318	positive	1028790925
1000714912	female	33	Gynecology	20240109	negative	1027940633
1000714987	female	36	Reproductive Gynecology	20240326	negative	1028907578
1000715682	female	46	Gynecology	20240111	negative	1027977021
1000718283	female	61	Gynecology	20240326	negative	1028904802
1000719505	female	38	Gynecology	20240322	negative	1028866770
1000721231	female	39	Gynecology	20240312	negative	1028717269
1000723335	female	36	Gynecology	20240227	negative	1028510645
1000723841	female	28	Gynecology	20240516	negative	1029598040
1000724990	female	54	Gynecology	20240510	negative	1029501331
1000729480	female	45	Gynecology	20240224	negative	1028489305
1000731675	female	32	Reproductive Gynecology	20240514	negative	1029563994
1000732445	female	38	Gynecology	20240409	negative	1029085504
1000733570	female	48	Gynecology	20240523	negative	1029692444
1000734662	female	45	Reproductive Gynecology	20240717	negative	1030451006
1000738482	female	28	Gynecology	20240220	negative	1028416237
1000739789	female	35	Gynecology	20240420	negative	1029251706
1000739887	female	48	Gynecology	20240412	negative	1029138901
1000740778	female	41	Gynecology	20240626	negative	1030160378
1000744042	female	39	Gynecology	20240522	negative	1029679563
1000752195	female	43	Reproductive Gynecology	20240625	negative	1030141729
1000754053	female	44	Gynecology	20240724	negative	1030562618
1000755315	female	28	Gynecology	20240320	negative	1028829123
1000756100	female	35	Gynecology	20240614	negative	1029986982
1000756870	female	32	Gynecology	20240520	negative	1029638033
1000757423	female	49	Reproductive Gynecology	20240328	negative	1028944437
1000757581	female	64	Gynecology	20240727	negative	1030615097
1000760149	female	40	Gynecology	20240201	negative	1028253786
1000760212	female	39	Reproductive Gynecology	20240608	negative	1029915969
1000763236	female	52	Gynecology	20240618	negative	1030033660
1000765604	female	47	Gynecology	20240423	negative	1029282445
1000766111	female	26	Gynecology	20240202	negative	1028263174
1000767271	female	27	Gynecology	20240510	positive	1029509310
1000769872	female	27	Gynecology	20240120	negative	1028099067
1000773144	female	29	Reproductive Gynecology	20240228	negative	1028536118
1000774137	female	30	Reproductive Gynecology	20240309	negative	1028676686
1000776349	female	26	Gynecology	20240224	negative	1028484449
1000776955	female	33	Gynecology	20240606	negative	1029889995
1000777067	female	39	Gynecology	20240402	negative	1029000397
1000777437	female	42	Gynecology	20240119	negative	1028084182
1000779431	female	40	Reproductive Gynecology	20240322	negative	1028864153
1000782327	female	47	Gynecology	20240326	negative	1028906219
1000782401	female	46	Reproductive Gynecology	20240113	negative	1028006471
1000782652	female	50	Gynecology	20240717	negative	1030458161
1000783052	female	37	Reproductive Gynecology	20240716	negative	1030438027
1000783091	female	51	Gynecology	20240618	negative	1030025213
1000783163	female	27	Gynecology	20240109	negative	1027941794
1000784361	female	37	Gynecology	20240202	negative	1028262826
1000785033	female	47	Gynecology	20240724	negative	1030564558
1000788224	female	34	Gynecology	20240327	negative	1028931337
1000788770	female	43	Gynecology	20240518	negative	1029619704
1000789236	female	43	Gynecology	20240422	negative	1029261596
1000789706	female	37	Reproductive Gynecology	20240424	negative	1029299730
1000789789	female	34	Gynecology	20240621	negative	1030083036
1000789879	female	35	Reproductive Gynecology	20240730	negative	1030649110
1000791748	female	46	Gynecology	20240316	negative	1028777133
1000793000	female	48	Gynecology	20240224	negative	1028489654
1000793446	female	49	Gynecology	20240522	negative	1029670337
1000793843	female	36	Gynecology	20240709	negative	1030326171
1000797202	female	53	Gynecology	20240703	negative	1030253209
1000798569	female	41	Gynecology	20240531	negative	1029801482
1000803654	female	50	Gynecology	20240411	negative	1029122703
1000804818	female	35	Gynecology	20240205	negative	1028290947
1000805393	female	32	Gynecology	20240322	negative	1028862812
1000806023	female	32	Reproductive Gynecology	20240330	negative	1028973826
1000806513	female	36	Reproductive Gynecology	20240615	negative	1030001896
1000807164	female	38	Gynecology	20240319	negative	1028816424
1000809628	female	28	Gynecology	20240312	negative	1028706661
1000810909	female	39	Gynecology	20240423	negative	1029288926
1000812293	female	42	Gynecology	20240724	negative	1030569094
1000814561	female	48	Gynecology	20240320	negative	1028826372
1000816857	female	38	Gynecology	20240410	negative	1029108007
1000819659	female	34	Reproductive Gynecology	20240319	negative	1028809552
1000823498	female	31	Gynecology	20240717	negative	1030458856
1000825002	female	29	Gynecology	20240219	negative	1028403891
1000826954	female	53	Gynecology	20240528	negative	1029753618
1000827450	female	49	Gynecology	20240319	negative	1028816445
1000827888	female	54	Gynecology	20240702	negative	1030234381
1000828577	female	35	Reproductive Gynecology	20240420	negative	1029253488
1000832205	female	57	Gynecology	20240620	negative	1030073009
1000834863	female	29	Gynecology	20240104	negative	1027884096
1000838472	female	42	Reproductive Gynecology	20240523	negative	1029687591
1000841930	female	37	Reproductive Gynecology	20240620	negative	1030064847
1000843638	female	29	Reproductive Gynecology	20240413	negative	1029150788
1000843873	female	24	Gynecology	20240409	negative	1029088809
1000845891	female	36	Gynecology	20240417	negative	1029198829
1000852219	female	48	Gynecology	20240408	negative	1029076599
1000855092	female	61	Gynecology	20240726	negative	1030599330
1000860744	female	48	Gynecology	20240605	negative	1029871730
1000861122	female	47	Gynecology	20240723	negative	1030547902
1000863626	female	31	Reproductive Gynecology	20240727	negative	1030621222
1000866457	female	46	Reproductive Gynecology	20240429	negative	1029370285
1000873166	female	45	Gynecology	20240110	negative	1027954918
1000873311	female	61	Gynecology	20240522	negative	1029677410
1000876868	female	33	Reproductive Gynecology	20240118	negative	1028072640
1000878020	female	41	Gynecology	20240308	negative	1028664974
1000880050	female	40	Gynecology	20240201	negative	1028253448
1000880892	female	52	Gynecology	20240522	negative	1029678813
1000883226	female	28	Reproductive Gynecology	20240706	negative	1030298901
1000884090	female	49	Gynecology	20240202	negative	1028259241
1000884965	female	43	Reproductive Gynecology	20240508	negative	1029471223
1000885485	female	32	Gynecology	20240705	negative	1030277138
1000885486	female	27	Gynecology	20240228	negative	1028536621
1000885779	female	37	Gynecology	20240710	negative	1030342638
1000886132	female	23	Gynecology	20240419	negative	1029239768
1000886145	female	38	Gynecology	20240308	negative	1028669609
1000886751	female	40	Gynecology	20240202	negative	1028262451
1000887220	female	35	Gynecology	20240316	negative	1028782968
1000888068	female	60	Gynecology	20240704	negative	1030267113
1000889404	female	55	Gynecology	20240127	negative	1028194605
1000891864	female	42	Reproductive Gynecology	20240705	negative	1030286502
1000892671	female	52	Gynecology	20240308	negative	1028666556
1000898508	female	48	Reproductive Gynecology	20240627	negative	1030173359
1000898691	female	40	Gynecology	20240305	negative	1028614279
1000899116	female	26	Gynecology	20240401	negative	1028986775
1000900273	female	44	Gynecology	20240111	negative	1027979228
1000900997	female	28	Gynecology	20240712	negative	1030386365
1000901186	female	33	Gynecology	20240620	negative	1030074573
1000902944	female	41	Reproductive Gynecology	20240705	negative	1030277697
1000904826	female	33	Gynecology	20240207	negative	1028319966
1000906180	female	40	Gynecology	20240727	negative	1030611856
1000907325	female	52	Gynecology	20240717	negative	1030458634
1000907409	female	38	Gynecology	20240724	negative	1030568502
1000907521	female	43	Gynecology	20240410	negative	1029109708
1000911315	female	30	Gynecology	20240607	negative	1029900954
1000913999	female	46	Reproductive Gynecology	20240704	negative	1030268195
1000916386	female	41	Gynecology	20240719	negative	1030494653
1000916958	female	25	Gynecology	20240713	negative	1030400408
1000917142	female	48	Reproductive Gynecology	20240402	negative	1029008177
1000920352	female	41	Gynecology	20240326	negative	1028914541
1000920642	female	37	Gynecology	20240205	negative	1028295736
1000926747	female	42	Gynecology	20240124	negative	1028146306
1000932178	female	36	Reproductive Gynecology	20240704	negative	1030267114
1000932555	female	42	Reproductive Gynecology	20240614	negative	1029989273
1000933904	female	51	Gynecology	20240731	negative	1030667562
1000935314	female	28	Reproductive Gynecology	20240221	negative	1028438598
1000935699	female	38	Gynecology	20240221	negative	1028439553
1000935964	female	38	Reproductive Gynecology	20240330	negative	1028974550
1000935999	female	48	Gynecology	20240606	negative	1029888095
1000937063	female	56	Gynecology	20240725	negative	1030580088
1000937146	female	56	Gynecology	20240618	negative	1030039697
1000937818	female	35	Reproductive Gynecology	20240415	negative	1029167104
1000938274	female	45	Gynecology	20240729	negative	1030628244
1000939305	female	49	Gynecology	20240313	negative	1028736176
1000941972	female	41	Gynecology	20240620	negative	1030068925
1000942570	female	40	Gynecology	20240222	negative	1028451395
1000945530	female	33	Reproductive Gynecology	20240220	negative	1028419825
1000945579	female	32	Reproductive Gynecology	20240320	negative	1028832022
1000945977	female	67		20240614	negative	7101122135
1000947473	female	35	Gynecology	20240427	negative	1029345667
1000950806	female	46	Reproductive Gynecology	20240413	negative	1029158967
1000952031	female	34	Gynecology	20240426	negative	1029332231
1000952565	female	33	Reproductive Gynecology	20240528	negative	1029758451
1000952718	female	34	Gynecology	20240219	negative	1028404241
1000952762	female	52	Gynecology	20240409	negative	1029092178
1000953457	female	60	Gynecology	20240329	negative	1028955684
1000954513	female	33	Gynecology	20240109	negative	1027944370
1000957337	female	51	Gynecology	20240627	negative	1030175328
1000961383	female	56	Gynecology	20240528	negative	1029758210
1000962842	female	61	Gynecology	20240703	negative	1030254410
1000963222	female	42	Reproductive Gynecology	20240502	negative	1029403486
1000963398	female	55	Gynecology	20240608	negative	1029916485
1000968377	female	72	Gynecology	20240328	negative	1028943366
1000968652	female	37	Gynecology	20240326	negative	1028902161
1000969817	female	31	Gynecology	20240621	negative	1029814722
1000969901	female	33	Gynecology	20240618	negative	1030027383
1000973412	男	53	Urology Department	20240712	negative	1030377992
1000974047	female	61	Reproductive Gynecology	20240426	negative	1029335508
1000974167	female	51	Reproductive Gynecology	20240120	negative	1028097254
1000975361	female	35	Gynecology	20240416	negative	1029182639
1000975417	female	45	Gynecology	20240430	negative	1029401646
1000977514	female	44	Gynecology	20240726	negative	1030602393
1000979097	female	42	Gynecology	20240706	negative	1030298953
1000980968	female	37	Gynecology	20240314	negative	1028753347
1000981410	female	49	Gynecology	20240613	negative	1029975061
1000982429	female	36	Reproductive Gynecology	20240412	negative	1029139285
1000982777	female	51	Gynecology	20240320	negative	1028828796
1000982873	female	51	Gynecology	20240329	negative	1028955213
1000984364	female	61	Reproductive Gynecology	20240605	negative	1029865561
1000984673	female	41	Gynecology	20240620	negative	1030064012
1000984804	female	45	Gynecology	20240302	negative	1028586576
1000985736	female	32	Gynecology	20240125	negative	1028165744
1000988125	female	41	Gynecology	20240606	negative	1029882329
1000988308	female	44	Gynecology	20240427	negative	1029345427
1000989027	female	37	Gynecology	20240711	negative	1030371834
1000990573	female	54	Reproductive Gynecology	20240313	negative	1028728936
1000990687	female	46	Gynecology	20240705	negative	1030283994
1000991671	female	41	Gynecology	20240207	negative	1028321272
1000992120	female	47	Gynecology	20240702	negative	1030232775
1000992260	female	57	Gynecology	20240620	negative	1030075327
1000994594	female	36	Gynecology	20240628	negative	1030190526
1000995037	female	41	Gynecology	20240704	negative	1030270271
1000995102	female	54	Gynecology	20240429	negative	1029372893
1000997725	female	49	Gynecology	20240105	negative	1027904621
1001000409	female	28	Gynecology	20240718	negative	1030476368
1001000617	female	39	Gynecology	20240327	negative	1028929638
1001001332	female	59	Gynecology	20240531	negative	1029802480
1001002142	female	32	Gynecology	20240426	negative	1029337675
1001002827	female	53	Reproductive Gynecology	20240416	negative	1029184176
1001004289	female	44	Gynecology	20240620	negative	1030075308
1001004342	female	34	Gynecology	20240529	negative	1029772146
1001005659	female	31	Reproductive Gynecology	20240625	negative	1030137601
1001006066	female	37	Gynecology	20240319	negative	1028807343
1001006140	female	31	Gynecology	20240710	negative	1030350465
1001008449	female	52	Gynecology	20240131	negative	1028234004
1001010440	female	33	Gynecology	20240710	negative	1030351012
1001014206	female	34	Gynecology	20240628	negative	1030191015
1001014606	female	32	Reproductive Gynecology	20240106	negative	1027919168
1001014845	female	27	Gynecology	20240522	negative	1029678620
1001016226	female	67	Gynecology	20240423	negative	1029286209
1001017174	female	37	Reproductive Gynecology	20240106	negative	1027919011
1001017835	female	35	Gynecology	20240301	negative	1028564760
1001020679	female	53	Gynecology	20240410	negative	1029105572
1001020770	female	47	Gynecology	20240730	negative	1030644357
1001020974	female	27	Reproductive Gynecology	20240725	negative	1030585671
1001021427	female	34	Reproductive Gynecology	20240429	negative	1029374340
1001021849	female	29	Gynecology	20240703	negative	1030251693
1001022507	female	31	Gynecology	20240714	negative	1030412646
1001022649	female	32	Gynecology	20240618	negative	1030032654
1001022794	female	38	Gynecology	20240426	negative	1029330892
1001024261	female	44	Gynecology	20240508	negative	1029478995
1001024737	female	37	Gynecology	20240614	negative	1029986131
1001027830	female	47	Reproductive Gynecology	20240513	negative	1029535068
1001029334	female	46	Gynecology	20240419	negative	1029237755
1001031216	female	38	Gynecology	20240607	negative	1029899776
1001032522	female	32	Gynecology	20240306	negative	1028639565
1001032709	female	27	Reproductive Gynecology	20240318	negative	1028790541
1001034214	female	28	Gynecology	20240725	negative	1030580462
1001036506	female	38	Gynecology	20240523	negative	1029694214
1001036918	female	38	Gynecology	20240126	negative	1028177343
1001037895	female	29	Gynecology	20240430	negative	1029391659
1001038499	female	38	Gynecology	20240605	negative	1029871278
1001038550	female	31	Gynecology	20240720	negative	1030509204
1001040403	female	40	Gynecology	20240306	negative	1028637417
1001044183	female	37	Gynecology	20240306	negative	1028630743
1001044553	female	42	Gynecology	20240207	negative	1028319535
1001046951	female	37	Gynecology	20240723	negative	1030540397
1001048086	female	47	Gynecology	20240419	negative	1029232367
1001049327	female	28	Gynecology	20240423	negative	1029283231
1001049650	female	33	Gynecology	20240529	negative	1029775122
1001053659	female	67	Gynecology	20240408	negative	1029067999
1001054932	female	30	Gynecology	20240418	negative	1029220255
1001059497	female	38	Gynecology	20240429	negative	1029375349
1001060063	female	40	Reproductive Gynecology	20240606	negative	1029886465
1001063468	female	47	Gynecology	20240510	negative	1029511175
1001063726	female	27	Reproductive Gynecology	20240718	negative	1030475063
1001063836	female	36	Gynecology	20240717	negative	1030456771
1001067021	female	48	Gynecology	20240307	negative	1028648445
1001067222	female	48	Gynecology	20240515	negative	1029576778
1001067679	female	49	Gynecology	20240221	negative	1028433986
1001068502	female	52	Gynecology	20240726	negative	1030606006
1001069041	female	27	Gynecology	20240731	negative	1030672997
1001069999	female	53	Gynecology	20240327	negative	1028926205
1001070180	female	29	Gynecology	20240411	negative	1029123525
1001071554	female	43	Gynecology	20240305	negative	1028619874
1001072073	female	46	Gynecology	20240327	negative	1028923638
1001072718	female	29	Gynecology	20240315	negative	1028766638
1001074077	female	53	Gynecology	20240704	negative	1030263764
1001074636	female	30	Reproductive Gynecology	20240429	negative	1029374424
1001076945	female	67	Gynecology	20240618	negative	1030033674
1001077347	female	38	Reproductive Gynecology	20240720	negative	1030511764
1001078337	female	53	Gynecology	20240521	negative	1029660465
1001080806	female	20	Gynecology	20240619	negative	1030049287
1001080949	female	45	Gynecology	20240329	negative	1028957871
1001082049	female	26	Gynecology	20240105	negative	1027902269
1001083295	female	38	Gynecology	20240112	negative	1027989980
1001083967	female	34	Gynecology	20240703	negative	1030251917
1001086277	female	41	Gynecology	20240329	negative	1028963844
1001087363	female	40	Gynecology	20240522	negative	1029679568
1001087373	female	25	Gynecology	20240425	negative	1029318872
1001087865	female	34	Gynecology	20240417	negative	1029210291
1001091443	female	49	Gynecology	20240521	negative	1029660272
1001091547	female	53	Gynecology	20240320	negative	1028830392
1001091558	female	45	Gynecology	20240705	negative	1030283018
1001096753	female	31	Gynecology	20240614	negative	1029991495
1001097508	female	37	Gynecology	20240604	negative	1029847954
1001098559	female	41	Reproductive Gynecology	20240717	negative	1030456135
1001099583	female	57	Gynecology	20240409	negative	1029084487
1001102305	female	31	Gynecology	20240408	negative	1029077690
1001103063	female	50	Gynecology	20240724	negative	1030568343
1001103297	female	50	Gynecology	20240320	negative	1028834212
1001103982	female	28	Reproductive Gynecology	20240425	negative	1029319663
1001104657	female	56	Reproductive Gynecology	20240717	negative	1030450693
1001104963	female	41	Gynecology	20240229	negative	1028555062
1001105034	female	38	Reproductive Gynecology	20240702	negative	1030236221
1001105948	female	54	Gynecology	20240622	negative	1030103791
1001108131	female	43	Gynecology	20240702	negative	1030237766
1001109573	female	40	Gynecology	20240305	negative	1028609446
1001109996	female	30	Gynecology	20240725	negative	1030582067
1001110603	female	40	Gynecology	20240117	negative	1028048943
1001111132	female	42	Gynecology	20240412	negative	1029140824
1001114492	female	39	Reproductive Gynecology	20240201	negative	1028252341
1001115838	female	50	Reproductive Gynecology	20240315	negative	1028763356
1001116624	female	33	Gynecology	20240709	negative	1030335098
1001116679	female	28	Gynecology	20240327	negative	1028930013
1001117051	female	33	Gynecology	20240109	negative	1027942510
1001118550	female	34	Reproductive Gynecology	20240701	negative	1030213198
1001119551	female	43	Reproductive Gynecology	20240426	negative	1029334387
1001120304	female	39	Gynecology	20240131	negative	1028235998
1001121191	female	45	Gynecology	20240507	negative	1029449063
1001121497	female	30	Reproductive Gynecology	20240711	negative	1030369891
1001121631	female	36	Gynecology	20240205	negative	1028294124
1001121631	female	36	Gynecology	20240507	negative	1029457263
1001122409	female	31	Gynecology	20240323	negative	1028876128
1001122731	female	54	Gynecology	20240508	negative	1029477637
1001123766	female	53	Gynecology	20240308	negative	1028662245
1001124095	female	29	Gynecology	20240709	negative	1030337024
1001124096	female	28	Gynecology	20240731	negative	1030672791
1001125084	female	25	Gynecology	20240510	negative	1029508474
1001126790	female	51	Gynecology	20240323	negative	1028881040
1001130320	female	48	Gynecology	20240704	negative	1030271873
1001132251	female	33	Gynecology	20240423	negative	1029286356
1001135002	female	50	Gynecology	20240119	negative	1028080580
1001136119	female	33	Gynecology	20240205	negative	1028295236
1001146078	female	38	Gynecology	20240313	negative	1028734130
1001146963	female	29	Reproductive Gynecology	20240319	negative	1028816534
1001149316	female	48	Gynecology	20240103	negative	1027864583
1001149651	female	40	Reproductive Gynecology	20240427	negative	1029346611
1001152795	female	50	Gynecology	20240209	negative	1028336998
1001152939	female	30	Gynecology	20240202	negative	1028264782
1001153028	female	33	Gynecology	20240604	negative	1029851916
1001153555	female	49	Gynecology	20240725	negative	1030576700
1001160473	female	38	Gynecology	20240202	negative	1028260347
1001161147	female	30	Gynecology	20240716	negative	1030437169
1001162046	female	71	Gynecology	20240426	negative	1029334900
1001165234	female	38	Gynecology	20240327	negative	1028930032
1001166375	female	31	Reproductive Gynecology	20240415	negative	1029166729
1001166595	female	44	Gynecology	20240531	negative	1029803021
1001166831	female	40	Gynecology	20240425	negative	1029322195
1001166965	female	46	Gynecology	20240110	negative	1027958314
1001168107	female	28	Reproductive Gynecology	20240119	negative	1028082018
1001168750	female	47	Gynecology	20240716	negative	1030427411
1001168901	female	46	Reproductive Gynecology	20240731	negative	1030668399
1001169575	female	51	Gynecology	20240717	negative	1030448699
1001170379	female	60	Gynecology	20240313	negative	1028736335
1001171109	female	38	Gynecology	20240312	negative	1028714568
1001173793	female	28	Gynecology	20240412	negative	1029140930
1001176915	female	50	Gynecology	20240725	negative	1030588668
1001177241	female	41	Gynecology	20240105	negative	1027899945
1001180440	female	33	Gynecology	20240307	negative	1028650404
1001186006	female	51	Gynecology	20240201	negative	1028253583
1001187771	female	36	Gynecology	20240723	negative	1030551012
1001192736	female	35	Gynecology	20240704	negative	1030262205
1001198913	female	27	Gynecology	20240314	negative	1028753533
1001206534	female	33	Gynecology	20240104	negative	1027889864
1001208802	female	32	Reproductive Gynecology	20240124	negative	1028148923
1001211157	female	40	Gynecology	20240123	negative	1028130879
1001214138	female	35	Reproductive Gynecology	20240403	negative	1029020999
1001214240	female	64	Gynecology	20240120	negative	1028100121
1001217157	female	43	Gynecology	20240507	negative	1029460166
1001217527	female	26	Gynecology	20240424	negative	1029305562
1001220294	female	37	Gynecology	20240307	negative	1028648539
1001221953	female	32	Reproductive Gynecology	20240422	negative	1029263482
1001222475	female	53	Gynecology	20240717	negative	1030450588
1001222977	female	39	Gynecology	20240419	negative	1029237888
1001223128	female	47	Gynecology	20240619	negative	1030057948
1001223131	female	36	Gynecology	20240402	negative	1028998508
1001225460	female	33	Gynecology	20240430	negative	1029402540
1001225535	female	36	Gynecology	20240530	negative	1029784671
1001229486	female	54	Gynecology	20240312	negative	1028709552
1001229974	female	33	Gynecology	20240709	negative	1030333642
1001231759	female	36	Reproductive Gynecology	20240522	negative	1029673556
1001234515	female	28	Reproductive Gynecology	20240422	negative	1029264697
1001236078	female	39	Gynecology	20240424	negative	1029305500
1001238126	female	38	Gynecology	20240601	negative	1029812737
1001238960	female	38	Reproductive Gynecology	20240405	negative	1029037154
1001239032	female	35	Gynecology	20240112	negative	1027990128
1001239825	female	58	Gynecology	20240627	negative	1030176430
1001239840	female	41	Gynecology	20240117	negative	1028050662
1001239876	female	48	Gynecology	20240619	negative	1030057815
1001240429	female	40	Gynecology	20240723	negative	1030535172
1001241691	female	59	Gynecology	20240202	negative	1028263782
1001243746	female	33	Gynecology	20240614	negative	1029983594
1001243884	female	29	Gynecology	20240515	negative	1029574707
1001244759	female	45	Gynecology	20240605	negative	1029873292
1001245064	female	30	Gynecology	20240327	negative	1028929596
1001251655	female	39	Gynecology	20240607	negative	1029897466
1001252229	female	35	Gynecology	20240530	negative	1029788188
1001252972	female	45	Reproductive Gynecology	20240315	negative	1028763931
1001254955	female	26	Reproductive Gynecology	20240510	negative	1029505003
1001256162	female	57	Gynecology	20240605	negative	1029871937
1001256943	female	61	Gynecology	20240717	negative	1030456461
1001257014	female	33	Gynecology	20240313	negative	1028732352
1001259313	female	61	Gynecology	20240515	negative	1029579629
1001260978	female	54	Gynecology	20240727	negative	1030623324
1001261499	female	37	Reproductive Gynecology	20240206	negative	1028308286
1001261731	female	47	Gynecology	20240103	negative	1027874544
1001262249	female	37	Gynecology	20240724	negative	1030558683
1001263120	female	44	Gynecology	20240307	negative	1028655837
1001263291	female	53	Gynecology	20240112	negative	1027987360
1001263675	female	37	Gynecology	20240718	negative	1030470488
1001264385	female	41	Reproductive Gynecology	20240727	negative	1030621553
1001265207	female	43	Reproductive Gynecology	20240709	negative	1030331984
1001265822	female	47	Gynecology	20240507	negative	1029460179
1001267320	female	44	Gynecology	20240305	negative	1028615193
1001267469	female	34	Gynecology	20240704	negative	1030270914
1001268450	female	44	Reproductive Gynecology	20240412	negative	1029145238
1001268853	female	43	Gynecology	20240327	negative	1028928488
1001270560	female	28	Gynecology	20240130	negative	1028222181
1001272294	female	29	Gynecology	20240423	negative	1029288490
1001272465	female	32	Gynecology	20240725	negative	1030584541
1001272551	female	41	Gynecology	20240321	negative	1028845575
1001273559	female	40	Gynecology	20240305	negative	1028611388
1001273882	female	87	Gynecology	20240417	negative	1029208058
1001274349	female	59	Gynecology	20240713	negative	1030402580
1001276082	female	30	Reproductive Gynecology	20240125	negative	1028163010
1001276697	female	34	Gynecology	20240521	negative	1029654487
1001277046	female	33	Reproductive Gynecology	20240731	negative	1030671278
1001278390	female	43	Gynecology	20240127	negative	1028193427
1001281462	female	61	Gynecology	20240408	negative	1029077880
1001282040	female	43	Gynecology	20240328	negative	1028941860
1001285147	female	30	Reproductive Gynecology	20240710	negative	1030355069
1001285868	female	55	Reproductive Gynecology	20240515	negative	1029576745
1001288631	female	34	Gynecology	20240223	negative	1028470841
1001291606	female	58	Gynecology	20240731	negative	1030672947
1001293512	female	49	Reproductive Gynecology	20240417	negative	1029198013
1001293641	female	38	Gynecology	20240509	negative	1029496548
1001294316	female	28	Gynecology	20240605	negative	1029869946
1001297186	female	50	Gynecology	20240426	negative	1029335503
1001297399	female	34	Reproductive Gynecology	20240625	negative	1030132801
1001297861	female	44	Gynecology	20240606	negative	1029883634
1001298260	female	32	Gynecology	20240423	negative	1029288890
1001298601	female	31	Reproductive Gynecology	20240524	negative	1029707098
1001302365	female	47	Gynecology	20240424	negative	1029303327
1001302642	female	31	Gynecology	20240319	negative	1028812651
1001304667	female	35	Reproductive Gynecology	20240513	negative	1029534915
1001304859	female	48	Gynecology	20240417	negative	1029200698
1001306830	female	26	Gynecology	20240131	negative	1028234873
1001319654	female	33	Gynecology	20240724	negative	1030570042
1001321177	female	56	Gynecology	20240626	negative	1030154551
1001321851	female	28	Gynecology	20240305	negative	1028619918
1001321851	female	29	Gynecology	20240706	negative	1030296778
1001322703	female	47	Gynecology	20240219	negative	1028398673
1001322906	female	26	Gynecology	20240530	negative	1029793325
1001323119	female	70	Gynecology	20240327	negative	1028928896
1001323998	female	47	Gynecology	20240314	negative	1028745742
1001325000	female	40	Gynecology	20240725	negative	1030582882
1001325064	female	52	Gynecology	20240530	negative	1029792736
1001325191	female	46	Gynecology	20240511	negative	1029517272
1001330919	female	36	Gynecology	20240704	negative	1030268102
1001332176	female	36	Gynecology	20240322	negative	1028861751
1001334796	female	39	Gynecology	20240306	negative	1028637379
1001335196	female	54	Gynecology	20240201	negative	1028248959
1001335196	female	55	Gynecology	20240704	negative	1030261053
1001335266	female	59	Gynecology	20240521	negative	1029661812
1001335763	female	58	Gynecology	20240527	negative	1029732580
1001335973	female	30	Reproductive Gynecology	20240301	negative	1028567098
1001338102	female	56	Gynecology	20240408	negative	1029066755
1001340135	female	54	Gynecology	20240422	negative	1029263389
1001342357	female	49	Gynecology	20240424	negative	1029302904
1001342804	female	61	Gynecology	20240321	negative	1028844311
1001343169	female	41	Gynecology	20240125	negative	1028164118
1001344483	female	29	Reproductive Gynecology	20240326	negative	1028910242
1001345915	female	25	Reproductive Gynecology	20240720	negative	1030509857
1001348437	female	42	Gynecology	20240312	negative	1028708986
1001349645	female	37	Gynecology	20240408	negative	1029076495
1001350876	female	36	Reproductive Gynecology	20240319	negative	1028815605
1001350933	female	49	Reproductive Gynecology	20240430	negative	1029386300
1001350949	female	32	Gynecology	20240314	negative	1028749701
1001351473	female	65	Gynecology	20240607	negative	1029898557
1001351617	female	34	Gynecology	20240206	negative	1028305509
1001351658	female	49	Gynecology	20240321	negative	1028847615
1001351815	female	53	Gynecology	20240418	negative	1029220884
1001355109	female	32	Reproductive Gynecology	20240614	negative	1029987966
1001356708	female	25	Gynecology	20240312	negative	1028712208
1001357568	female	42	Reproductive Gynecology	20240321	negative	1028845709
1001359947	female	48	Gynecology	20240627	negative	1030173770
1001360359	female	46	Gynecology	20240425	negative	1029322185
1001362816	female	46	Gynecology	20240711	negative	1030367817
1001366084	female	39	Gynecology	20240430	negative	1029402870
1001366940	female	68	Reproductive Gynecology	20240710	negative	1030348240
1001368439	female	66	Gynecology	20240116	negative	1028030495
1001369215	female	40	Reproductive Gynecology	20240423	negative	1029287397
1001373186	female	29	Gynecology	20240528	negative	1029758869
1001375281	female	50	Gynecology	20240322	negative	1028859259
1001375335	female	35	Reproductive Gynecology	20240726	negative	1030601864
1001376671	female	67	Gynecology	20240709	negative	1030333802
1001376788	female	32	Gynecology	20240301	negative	1028568545
1001377932	female	44	Gynecology	20240409	negative	1029086173
1001377962	female	29	Reproductive Gynecology	20240530	negative	1029791975
1001378234	female	55	Reproductive Gynecology	20240314	negative	1028748069
1001378286	female	30	Gynecology	20240328	negative	1028946649
1001378345	female	34	Reproductive Gynecology	20240727	negative	1030621287
1001378595	female	32	Gynecology	20240219	negative	1028387748
1001378719	female	49	Reproductive Gynecology	20240709	negative	1030333693
1001384700	female	38	Gynecology	20240305	negative	1028605800
1001386525	female	33	Gynecology	20240628	negative	1030190508
1001387397	female	28	Reproductive Gynecology	20240628	negative	1030185399
1001387560	female	52	Reproductive Gynecology	20240413	negative	1029156361
1001387564	female	49	Reproductive Gynecology	20240308	negative	1028663200
1001394777	female	32	Gynecology	20240425	negative	1029320265
1001396657	female	27	Reproductive Gynecology	20240224	negative	1028487409
1001396957	female	36	Gynecology	20240322	negative	1028863653
1001398000	female	43	Gynecology	20240508	negative	1029467398
1001398964	female	28	Gynecology	20240429	negative	1029369020
1001401259	female	32	Gynecology	20240409	negative	1029092803
1001405342	female	29	Gynecology	20240424	negative	1029303714
1001407218	female	66	Gynecology	20240510	negative	1029511938
1001407603	female	39	Gynecology	20240224	negative	1028486595
1001409239	female	51	Gynecology	20240726	negative	1030596507
1001409336	female	36	Gynecology	20240629	negative	1030201571
1001409477	female	32	Reproductive Gynecology	20240429	negative	1029372514
1001411298	female	34	Gynecology	20240412	negative	1029137715
1001414150	female	42	Reproductive Gynecology	20240119	negative	1028084789
1001415806	female	45	Gynecology	20240702	negative	1030235401
1001416405	female	30	Reproductive Gynecology	20240302	negative	1028578674
1001416578	female	45	Gynecology	20240328	negative	1028946912
1001416825	female	40	Gynecology	20240719	negative	1030485047
1001417262	female	45	Gynecology	20240521	negative	1029659222
1001418073	female	32	Gynecology	20240727	negative	1030622925
1001418149	female	30	Gynecology	20240301	negative	1028565407
1001418336	female	47	Gynecology	20240601	negative	1029820156
1001426051	female	27	Gynecology	20240625	negative	1030135567
1001426498	female	29	Reproductive Gynecology	20240716	negative	1030427089
1001429156	female	41	Gynecology	20240619	negative	1030053776
1001429894	female	33	Gynecology	20240312	negative	1028709151
1001433721	female	60	Gynecology	20240507	negative	1029457090
1001434197	female	45	Gynecology	20240527	negative	1029733048
1001437281	female	57	Gynecology	20240429	negative	1029366214
1001437407	female	51	Gynecology	20240328	negative	1028946719
1001441030	female	28	Gynecology	20240321	negative	1028851329
1001441135	female	45	Gynecology	20240507	negative	1029459269
1001441455	female	49	Gynecology	20240424	negative	1029299064
1001441724	female	60	Gynecology	20240418	negative	1029219724
1001443353	female	27	Gynecology	20240607	negative	1029900094
1001449106	female	31	Gynecology	20240309	negative	1028685558
1001449406	female	28	Gynecology	20240320	negative	1028834284
1001449459	female	32	Reproductive Gynecology	20240523	negative	1029691220
1001450185	female	35	Gynecology	20240606	negative	1029889574
1001453602	female	30	Gynecology	20240227	negative	1028516733
1001456730	female	38	Gynecology	20240410	negative	1029112834
1001458310	female	52	Gynecology	20240207	negative	1028316923
1001460145	female	42	Gynecology	20240514	negative	1029564520
1001461526	female	29	Reproductive Gynecology	20240428	negative	1029361358
1001463248	female	34	Reproductive Gynecology	20240416	negative	1029186784
1001465173	female	32	Reproductive Gynecology	20240619	negative	1030054468
1001465239	female	34	Gynecology	20240515	negative	1029580907
1001468038	female	41	Gynecology	20240628	negative	1030189078
1001468783	female	29	Gynecology	20240508	negative	1029478175
1001474238	female	67	Gynecology	20240517	negative	1029614355
1001474908	female	38	Reproductive Gynecology	20240530	negative	1029792977
1001476317	female	59	Gynecology	20240529	negative	1029766860
1001478551	female	29	Reproductive Gynecology	20240323	negative	1028873629
1001482946	female	48	Gynecology	20240620	negative	1030071174
1001484363	female	27	Gynecology	20240323	negative	1028879207
1001485798	female	35	Gynecology	20240718	negative	1030470468
1001485983	female	52	Reproductive Gynecology	20240118	negative	1028071654
1001487673	female	38	Gynecology	20240516	negative	1029594540
1001490914	female	51	Gynecology	20240227	negative	1028519744
1001491957	female	28	Gynecology	20240730	negative	1030657408
1001495231	female	36	Gynecology	20240703	negative	1030254241
1001497121	female	43	Reproductive Gynecology	20240307	negative	1028650196
1001497243	female	42	Gynecology	20240613	negative	1029970216
1001497378	female	32	Gynecology	20240618	negative	1030038701
1001497476	female	32	Reproductive Gynecology	20240131	negative	1028238905
1001497665	female	32	Gynecology	20240424	negative	1029304021
1001497799	female	59	Gynecology	20240525	negative	1029722824
1001497957	female	55	Gynecology	20240628	negative	1030191993
1001498957	female	24	Gynecology	20240506	negative	1029436375
1001501712	female	35	Reproductive Gynecology	20240612	negative	1029956877
1001501866	female	64	Gynecology	20240408	negative	1029075348
1001502131	female	36	Gynecology	20240417	negative	1029206532
1001505272	female	51	Reproductive Gynecology	20240716	negative	1030438506
1001511164	female	44	Gynecology	20240309	negative	1028682247
1001512750	female	27	Gynecology	20240424	negative	1029303018
1001513525	female	32	Gynecology	20240326	negative	1028913980
1001515306	female	26	Gynecology	20240330	negative	1028974052
1001515650	female	31	Gynecology	20240719	negative	1030489267
1001516408	female	34	Reproductive Gynecology	20240110	negative	1027959591
1001517002	female	54	Gynecology	20240319	negative	1028807595
1001517228	female	35	Reproductive Gynecology	20240113	negative	1028007337
1001517330	female	31	Gynecology	20240208	negative	1028328935
1001518467	female	65	Gynecology	20240410	negative	1029107084
1001522932	female	56	Gynecology	20240530	negative	1029793223
1001523613	female	53	Gynecology	20240222	negative	1028459736
1001525270	female	26	Gynecology	20240305	negative	1028615183
1001526530	female	37	Gynecology	20240222	negative	1028458774
1001527360	female	40	Gynecology	20240105	negative	1027905752
1001528211	female	26	Reproductive Gynecology	20240315	negative	1028766310
1001530698	female	52	Gynecology	20240711	negative	1030371485
1001531122	female	74	Gynecology	20240308	negative	1028665640
1001533248	female	43	Reproductive Gynecology	20240111	negative	1027973743
1001533811	female	31	Gynecology	20240315	negative	1028765568
1001535966	female	64	Gynecology	20240301	negative	1028572675
1001535966	female	64	Gynecology	20240614	negative	1029983181
1001536951	female	36	Gynecology	20240328	negative	1028948443
1001538261	female	32	Reproductive Gynecology	20240702	negative	1030235627
1001538613	female	65	Gynecology	20240621	negative	1030087199
1001538686	female	36	Gynecology	20240516	negative	1029597067
1001540151	female	29	Reproductive Gynecology	20240125	negative	1028162106
1001540381	female	47	Gynecology	20240516	negative	1029597117
1001540860	female	49	Gynecology	20240613	negative	1029971860
1001541369	female	33	Gynecology	20240403	negative	1029019005
1001542890	female	49	Gynecology	20240730	negative	1030656606
1001543254	female	36	Gynecology	20240625	negative	1030141908
1001544723	female	41	Reproductive Gynecology	20240702	negative	1030232640
1001549480	female	44	Reproductive Gynecology	20240622	negative	1030107206
1001549790	female	64	Gynecology	20240719	negative	1030484235
1001552773	female	46	Gynecology	20240416	negative	1029183267
1001554437	female	34	Gynecology	20240327	negative	1028931641
1001555978	female	53	Gynecology	20240322	negative	1028864624
1001556574	female	36	Gynecology	20240418	negative	1029226002
1001556825	female	22	Reproductive Gynecology	20240314	negative	1028752024
1001558826	female	41	Reproductive Gynecology	20240416	negative	1029189057
1001560938	female	46	Gynecology	20240413	negative	1029158530
1001561283	female	33	Reproductive Gynecology	20240408	negative	1029067565
1001561331	female	68	Gynecology	20240409	negative	1029084522
1001561716	female	40	Gynecology	20240515	negative	1029578309
1001562242	female	27	Gynecology	20240110	negative	1027961497
1001569039	female	36	Gynecology	20240105	negative	1027905659
1001569802	female	25	Gynecology	20240730	negative	1030656015
1001573184	female	33	Gynecology	20240724	negative	1030564132
1001574579	female	33	Reproductive Gynecology	20240528	negative	1029750166
1001578345	female	46	Gynecology	20240516	negative	1029596848
1001579923	female	32	Gynecology	20240502	negative	1029405040
1001580251	female	26	Gynecology	20240731	negative	1030672394
1001581733	female	29	Gynecology	20240425	negative	1029322326
1001585833	female	44	Gynecology	20240719	negative	1030495007
1001586208	female	27	Gynecology	20240202	negative	1028263093
1001586924	female	52	Gynecology	20240725	negative	1030586379
1001590771	female	74	Gynecology	20240318	negative	1028794695
1001592006	female	45	Gynecology	20240703	negative	1030253904
1001592177	female	31	Gynecology	20240417	negative	1029203087
1001593385	female	67	Gynecology	20240508	negative	1029476438
1001598458	female	40	Gynecology	20240416	negative	1029191394
1001598938	female	51	Reproductive Gynecology	20240305	negative	1028619557
1001599356	female	32	Gynecology	20240127	negative	1028192498
1001600157	female	31	Reproductive Gynecology	20240718	negative	1030474715
1001600301	female	44	Gynecology	20240724	negative	1030562202
1001600437	female	53	Gynecology	20240731	negative	1030674910
1001601043	female	34	Gynecology	20240703	negative	1030254402
1001602829	female	52	Reproductive Gynecology	20240618	negative	1030038381
1001604074	female	60	Reproductive Gynecology	20240118	negative	1028072277
1001606808	female	54	Reproductive Gynecology	20240712	negative	1030386366
1001608184	female	37	Gynecology	20240524	negative	1029708414
1001609755	female	47	Gynecology	20240508	negative	1029471053
1001611334	female	25	Reproductive Gynecology	20240517	negative	1029610982
1001611576	female	32	Gynecology	20240403	negative	1029018765
1001617249	female	30	Gynecology	20240714	negative	1030410484
1001619153	female	74	Reproductive Gynecology	20240223	negative	1028469549
1001622792	female	28	Gynecology	20240619	negative	1030057340
1001623585	female	52	Gynecology	20240206	negative	1028310169
1001624072	female	47	Gynecology	20240614	negative	1029982158
1001630781	female	45	Gynecology	20240126	negative	1028175804
1001633713	female	47	Gynecology	20240228	negative	1028538674
1001634723	female	32	Reproductive Gynecology	20240604	negative	1029846902
1001635017	female	33	Gynecology	20240320	negative	1028830778
1001635567	female	49	Gynecology	20240111	negative	1027980450
1001636399	female	39	Gynecology	20240530	negative	1029791450
1001636794	female	29	Gynecology	20240320	negative	1028834338
1001638225	female	34	Reproductive Gynecology	20240326	negative	1028914321
1001638435	female	33	Reproductive Gynecology	20240628	negative	1030185358
1001638822	female	32	Reproductive Gynecology	20240530	negative	1029791263
1001639204	female	37	Gynecology	20240620	negative	1030067769
1001639213	female	37	Reproductive Gynecology	20240619	negative	1030052666
1001640862	female	21	Gynecology	20240223	negative	1028468892
1001643236	female	33	Gynecology	20240314	negative	1028753801
1001645047	female	34	Reproductive Gynecology	20240718	negative	1030474217
1001645610	female	51	Gynecology	20240220	negative	1028415733
1001647442	female	32	Reproductive Gynecology	20240430	negative	1029387970
1001648578	female	38	Gynecology	20240130	negative	1028221504
1001649269	female	28	Gynecology	20240514	negative	1029554433
1001652850	female	45	Reproductive Gynecology	20240706	negative	1030296888
1001656623	female	31	Gynecology	20240607	negative	1029901852
1001657136	female	36	Gynecology	20240723	negative	1030547173
1001657425	female	39	Gynecology	20240711	negative	1030367647
1001658214	female	46	Gynecology	20240117	negative	1028052213
1001660634	female	36	Gynecology	20240513	negative	1029532653
1001662146	female	52	Reproductive Gynecology	20240201	negative	1028253490
1001666692	female	32	Gynecology	20240330	negative	1028971991
1001666700	female	45	Gynecology	20240726	negative	1030602771
1001667338	female	27	Gynecology	20240502	negative	1029404406
1001669788	female	56	Gynecology	20240109	negative	1027947203
1001670304	female	45	Gynecology	20240314	negative	1028754708
1001676515	female	34	Reproductive Gynecology	20240723	negative	1030545376
1001679920	female	47	Gynecology	20240319	negative	1028817156
1001680287	female	35	Gynecology	20240607	negative	1029900149
1001680582	female	53	Gynecology	20240402	negative	1029002163
1001682256	female	52	Gynecology	20240313	negative	1028731869
1001683836	female	39	Reproductive Gynecology	20240731	negative	1030668870
1001685031	female	30	Reproductive Gynecology	20240520	negative	1029635757
1001686341	female	36	Gynecology	20240424	negative	1029306371
1001686897	female	32	Gynecology	20240329	negative	1028958137
1001687151	female	42	Gynecology	20240710	negative	1030351607
1001687734	female	51	Gynecology	20240403	negative	1029015826
1001687766	female	29	Gynecology	20240206	negative	1028306641
1001689749	female	34	Gynecology	20240208	negative	1028329465
1001689804	female	48	Gynecology	20240207	negative	1028316755
1001695981	female	66	Gynecology	20240207	negative	1028319905
1001698291	female	45	Gynecology	20240731	negative	1030675834
1001700511	female	51	Gynecology	20240208	negative	1028326520
1001700854	female	26	Gynecology	20240529	negative	1029766985
1001704469	female	26	Gynecology	20240313	negative	1028735818
1001705270	female	68	Gynecology	20240724	negative	1030568672
1001707064	female	53		20240614	negative	7101122112
1001707418	female	33	Gynecology	20240606	negative	1029887823
1001707839	female	28	Reproductive Gynecology	20240327	negative	1028928929
1001708172	female	34	Gynecology	20240527	negative	1029731833
1001713817	female	33	Reproductive Gynecology	20240420	negative	1029250053
1001717706	female	53	Gynecology	20240329	negative	1028957703
1001717908	female	45	Gynecology	20240330	negative	1028977676
1001720397	female	30	Gynecology	20240427	negative	1029354140
1001723074	female	28	Gynecology	20240417	negative	1029207973
1001725246	female	54	Gynecology	20240723	negative	1030550382
1001726160	female	42	Gynecology	20240417	negative	1029206508
1001726727	female	56	Gynecology	20240514	negative	1029562188
1001726949	female	51	Gynecology	20240112	negative	1027988314
1001729009	female	59	Reproductive Gynecology	20240417	negative	1029202648
1001729195	female	45	Gynecology	20240116	negative	1028034007
1001729195	female	45	Gynecology	20240507	negative	1029454829
1001729209	female	42	Gynecology	20240411	negative	1029129067
1001729541	female	26	Gynecology	20240326	negative	1028912013
1001730712	female	31	Gynecology	20240327	negative	1028926467
1001731239	female	54	Gynecology	20240530	negative	1029793563
1001731294	female	28	Gynecology	20240607	negative	1029902220
1001732291	female	54	Gynecology	20240507	negative	1029442720
1001734929	female	64	Gynecology	20240628	negative	1030192105
1001735153	female	76	Gynecology	20240418	negative	1029222466
1001735367	female	53	Gynecology	20240112	negative	1027991543
1001736122	female	50	Gynecology	20240410	negative	1029109506
1001738074	female	38	Gynecology	20240221	negative	1028440575
1001739019	female	46	Gynecology	20240119	negative	1028078520
1001741409	female	50	Gynecology	20240517	negative	1029607876
1001742539	female	24	Reproductive Gynecology	20240223	negative	1028468854
1001744256	female	41	Reproductive Gynecology	20240731	negative	1030671134
1001746318	female	34	Gynecology	20240320	negative	1028827941
1001753861	female	46	Gynecology	20240513	negative	1029535109
1001756345	female	34	Reproductive Gynecology	20240311	negative	1028692156
1001756731	female	49	Gynecology	20240430	negative	1029382397
1001757905	female	47	Gynecology	20240530	negative	1029786524
1001758315	female	39	Reproductive Gynecology	20240613	negative	1029973300
1001759962	female	37	Reproductive Gynecology	20240731	negative	1030669232
1001760094	female	36	Gynecology	20240222	negative	1028460190
1001760957	female	26	Gynecology	20240628	negative	1030186921
1001760978	female	56	Gynecology	20240604	negative	1029845601
1001762032	female	28	Reproductive Gynecology	20240508	negative	1029478200
1001762676	female	48	Gynecology	20240704	negative	1030262399
1001763479	female	36	Reproductive Gynecology	20240113	negative	1028009072
1001764277	female	30	Reproductive Gynecology	20240320	negative	1028828507
1001764297	female	33	Gynecology	20240530	negative	1029783868
1001766323	female	45	Gynecology	20240110	negative	1027958362
1001767588	female	33	Reproductive Gynecology	20240401	negative	1028986845
1001767735	female	31	Gynecology	20240424	negative	1029301801
1001772531	female	33	Gynecology	20240402	negative	1029000788
1001772752	female	44	Gynecology	20240111	negative	1027979920
1001780055	female	55	Gynecology	20240319	negative	1028816064
1001780488	female	46	Gynecology	20240607	negative	1029895312
1001781279	female	36	Gynecology	20240118	negative	1028068230
1001784283	female	55	Gynecology	20240730	negative	1030656849
1001784860	female	29	Gynecology	20240523	negative	1029694601
1001784974	female	34	Reproductive Gynecology	20240415	negative	1029167847
1001786104	female	56	Gynecology	20240220	negative	1028425807
1001786187	female	48	Reproductive Gynecology	20240205	negative	1028296663
1001789203	female	57	Gynecology	20240527	negative	1029731009
1001789388	female	26	Gynecology	20240527	negative	1029731007
1001790279	female	21	Gynecology	20240423	negative	1029274385
1001792724	female	53	Gynecology	20240619	negative	1030049181
1001795869	female	38	Gynecology	20240110	negative	1027964801
1001796163	female	30	Gynecology	20240228	negative	1028540754
1001796898	female	56	Gynecology	20240425	negative	1029317487
1001797644	female	29	Reproductive Gynecology	20240618	negative	1030032484
1001798402	female	56	Gynecology	20240221	negative	1028441510
1001800204	female	36	Gynecology	20240627	negative	1030171434
1001802771	female	33	Gynecology	20240529	negative	1029772457
1001804327	female	27	Gynecology	20240105	negative	1027903849
1001809531	female	70	Gynecology	20240307	negative	1028647719
1001809678	female	31	Gynecology	20240112	negative	1027991833
1001810602	female	36	Gynecology	20240714	negative	1030410018
1001814839	female	39	Gynecology	20240525	negative	1029716724
1001815769	female	48	Gynecology	20240507	negative	1029457561
1001820324	female	79	Reproductive Gynecology	20240125	negative	1028165085
1001820795	female	47	Gynecology	20240320	negative	1028827002
1001821655	female	46	Gynecology	20240514	negative	1029558831
1001822017	female	46	Gynecology	20240423	negative	1029286649
1001822788	female	31	Gynecology	20240626	negative	1030160069
1001826001	female	48	Reproductive Gynecology	20240220	negative	1028425601
1001826479	female	28	Reproductive Gynecology	20240320	negative	1028832611
1001828277	female	46	Reproductive Gynecology	20240619	negative	1030049333
1001828758	female	36	Gynecology	20240612	negative	1029951159
1001833126	female	50	Gynecology	20240314	negative	1028750101
1001833891	female	28	Reproductive Gynecology	20240726	negative	1030598785
1001836266	female	62	Gynecology	20240515	negative	1029571734
1001836291	female	55	Gynecology	20240416	negative	1029177727
1001836581	female	39	Gynecology	20240416	negative	1029183127
1001837444	female	29	Reproductive Gynecology	20240419	negative	1029232788
1001839186	female	25	Gynecology	20240104	negative	1027891566
1001840233	female	38	Gynecology	20240329	negative	1028956211
1001840795	female	35	Gynecology	20240417	negative	1029206559
1001843572	female	24	Reproductive Gynecology	20240201	negative	1028248407
1001843836	female	31	Gynecology	20240219	negative	1028394933
1001845234	female	33	Reproductive Gynecology	20240719	negative	1030487680
1001845513	female	26	Gynecology	20240323	negative	1028883109
1001846130	female	32	Gynecology	20240321	negative	1028843677
1001847951	female	35	Gynecology	20240220	negative	1028424507
1001848584	female	51	Gynecology	20240605	negative	1029871402
1001852018	female	59	Gynecology	20240320	negative	1028832703
1001853240	female	27	Reproductive Gynecology	20240323	negative	1028881196
1001854394	female	39	Gynecology	20240309	negative	1028683084
1001856538	female	45	Gynecology	20240409	negative	1029096336
1001857536	female	25	Gynecology	20240708	negative	1030308994
1001858204	female	28	Gynecology	20240305	negative	1028619850
1001858837	female	37	Gynecology	20240509	negative	1029492096
1001861957	female	31	Reproductive Gynecology	20240716	negative	1030427009
1001866110	female	51	Reproductive Gynecology	20240626	negative	1030155086
1001866179	female	57	Reproductive Gynecology	20240621	negative	1030084097
1001872080	female	39	Reproductive Gynecology	20240612	negative	1029950948
1001872194	female	36	Reproductive Gynecology	20240322	negative	1028868141
1001872541	female	49	Gynecology	20240402	negative	1029002369
1001873327	female	32	Reproductive Gynecology	20240109	negative	1027947982
1001873663	female	40	Gynecology	20240605	negative	1029869446
1001873947	female	51	Reproductive Gynecology	20240614	negative	1029984426
1001876944	female	55	Gynecology	20240515	negative	1029582914
1001880904	female	40	Reproductive Gynecology	20240709	negative	1030325575
1001881208	female	53	Reproductive Gynecology	20240313	negative	1028728071
1001881454	female	42	Gynecology	20240430	negative	1029401282
1001882832	female	27	Gynecology	20240618	negative	1030040951
1001883129	female	30	Gynecology	20240118	negative	1028069074
1001884478	female	54	Reproductive Gynecology	20240710	negative	1030347931
1001885130	female	57	Gynecology	20240723	negative	1030550151
1001885670	female	31	Gynecology	20240719	negative	1030489860
1001885777	female	45	Gynecology	20240116	negative	1028034166
1001886245	female	49	Gynecology	20240118	negative	1028067041
1001886673	female	52	Gynecology	20240206	negative	1028309299
1001886684	female	28	Reproductive Gynecology	20240621	negative	1030082351
1001887745	female	39	Gynecology	20240731	negative	1030670326
1001895361	female	56	Gynecology	20240320	negative	1028834285
1001896047	female	24	Gynecology	20240228	negative	1028540343
1001896283	female	31	Gynecology	20240619	negative	1030059024
1001896375	female	42	Reproductive Gynecology	20240723	negative	1030549097
1001896616	female	34	Gynecology	20240219	negative	1028389457
1001896677	female	23	Reproductive Gynecology	20240410	negative	1029105011
1001897209	female	47	Gynecology	20240402	negative	1029006529
1001898770	female	54	Gynecology	20240508	negative	1029472277
1001899407	female	41	Gynecology	20240531	negative	1029800631
1001903172	female	37	Gynecology	20240123	negative	1028124219
1001903307	female	29	Reproductive Gynecology	20240419	negative	1029240129
1001906448	female	35	Gynecology	20240312	negative	1028719237
1001907464	female	26	Gynecology	20240112	negative	1027990864
1001908216	female	30	Reproductive Gynecology	20240409	negative	1029088415
1001909662	female	34	Gynecology	20240219	negative	1028399271
1001911208	female	52	Gynecology	20240727	negative	1030615271
1001912367	female	54	Reproductive Gynecology	20240719	negative	1030496912
1001915108	female	36	Gynecology	20240626	negative	1030160243
1001915208	female	48	Gynecology	20240118	negative	1028063737
1001915440	female	29	Reproductive Gynecology	20240311	negative	1028692977
1001915881	female	47	Reproductive Gynecology	20240719	negative	1030491336
1001916947	female	26	Gynecology	20240719	negative	1030493183
1001919301	female	52	Gynecology	20240704	negative	1030267237
1001921341	female	51	Gynecology	20240724	negative	1030562937
1001921664	female	53	Gynecology	20240124	negative	1028141270
1001925040	female	23	Gynecology	20240712	negative	1030386140
1001928941	female	39	Gynecology	20240517	negative	1029614001
1001931058	female	36	Reproductive Gynecology	20240219	negative	1028396374
1001934015	female	38	Gynecology	20240315	negative	1028768644
1001934205	female	29	Reproductive Gynecology	20240313	negative	1028731193
1001936944	female	38	Gynecology	20240219	negative	1028394241
1001940517	female	28	Reproductive Gynecology	20240613	negative	1029971663
1001941537	female	69	Gynecology	20240305	negative	1028609305
1001942330	female	42	Reproductive Gynecology	20240409	negative	1029094365
1001943503	female	55	Gynecology	20240104	negative	1027886771
1001947270	female	40	Reproductive Gynecology	20240719	negative	1030486152
1001947310	female	27	Gynecology	20240205	negative	1028297051
1001947931	female	37	Gynecology	20240105	negative	1027905076
1001948675	female	48	Gynecology	20240711	negative	1030365510
1001950823	female	26	Gynecology	20240423	negative	1029284776
1001952845	female	51	Gynecology	20240323	negative	1028882930
1001953369	female	58	Gynecology	20240510	negative	1029511246
1001953398	female	36	Reproductive Gynecology	20240629	negative	1030205337
1001954268	female	48	Reproductive Gynecology	20240706	negative	1030299691
1001954854	female	40	Gynecology	20240308	negative	1028666141
1001957386	female	60	Gynecology	20240314	negative	1028752940
1001959446	female	60	Gynecology	20240430	negative	1029399404
1001960074	female	38	Reproductive Gynecology	20240117	negative	1028055637
1001962768	female	41	Gynecology	20240529	negative	1029776174
1001963507	female	39	Gynecology	20240312	negative	1028717176
1001964456	female	28	Reproductive Gynecology	20240619	negative	1030053587
1001969112	female	29	Gynecology	20240731	negative	1030675705
1001969438	female	34	Gynecology	20240402	negative	1029001853
1001971218	female	44	Gynecology	20240424	negative	1029301637
1001972278	female	36	Gynecology	20240522	negative	1029679357
1001974156	female	35	Gynecology	20240510	negative	1029501927
1001975537	female	53	Reproductive Gynecology	20240315	negative	1028768991
1001976296	female	26	Reproductive Gynecology	20240611	negative	1029926210
1001979724	female	46	Gynecology	20240507	negative	1029456984
1001982745	female	46	Gynecology	20240221	negative	1028439364
1001984871	female	43	Gynecology	20240301	negative	1028565662
1001988634	female	26	Gynecology	20240103	negative	1027874182
1001990233	female	29	Gynecology	20240424	negative	1029305307
1001994300	female	56	Emergency and Trauma Surgery Department	20240616	negative	1030012392
1001995665	female	36	Gynecology	20240131	negative	1028237590
1001996999	female	27	Gynecology	20240422	negative	1029265484
1001998823	female	32	Gynecology	20240307	negative	1028655723
1001999962	female	38	Gynecology	20240529	negative	1029775007
1002001286	female	71	Gynecology	20240723	negative	1030534694
1002001830	female	25	Gynecology	20240124	negative	1028149637
1002002255	female	50	Reproductive Gynecology	20240608	negative	1029917086
1002002967	female	49	Gynecology	20240130	negative	1028218735
1002003183	female	43	Gynecology	20240514	negative	1029562181
1002003754	female	33	Reproductive Gynecology	20240413	negative	1029155419
1002003769	female	43	Gynecology	20240326	negative	1028910098
1002003945	female	33	Gynecology	20240305	negative	1028614449
1002008581	female	36	Reproductive Gynecology	20240430	negative	1029397806
1002012672	female	28	Reproductive Gynecology	20240513	negative	1029538337
1002017555	female	36	Gynecology	20240326	negative	1028911800
1002018570	female	58	Gynecology	20240712	negative	1030377896
1002019590	female	43	Gynecology	20240708	negative	1030307496
1002020415	female	28	Reproductive Gynecology	20240712	negative	1030381169
1002020623	female	44	Reproductive Gynecology	20240522	negative	1029677979
1002022143	female	36	Gynecology	20240409	negative	1029092298
1002023119	female	34	Gynecology	20240604	negative	1029848750
1002024148	female	39	Gynecology	20240430	negative	1029399465
1002024287	female	48	Gynecology	20240328	negative	1028942896
1002024287	female	48	Gynecology	20240713	negative	1030397079
1002025235	female	53	Gynecology	20240703	negative	1030246035
1002025821	female	49	Gynecology	20240227	negative	1028507921
1002027495	female	46	Gynecology	20240529	negative	1029771977
1002028433	female	36	Gynecology	20240518	negative	1029627854
1002031153	female	49	Gynecology	20240619	negative	1030052185
1002031546	female	49	Gynecology	20240314	negative	1028745738
1002032613	female	32	Reproductive Gynecology	20240502	negative	1029404341
1002037112	female	56	Gynecology	20240712	negative	1030379184
1002039047	female	39	Reproductive Gynecology	20240712	negative	1030384418
1002040294	female	26	Gynecology	20240322	negative	1028868455
1002041758	female	45	Gynecology	20240725	negative	1030582187
1002042795	female	41	Gynecology	20240513	negative	1029535787
1002043374	female	46	Gynecology	20240207	negative	1028319494
1002048147	female	31	Gynecology	20240402	negative	1028996830
1002048400	female	50	Reproductive Gynecology	20240703	negative	1030254210
1002049107	female	36	Gynecology	20240418	negative	1029222047
1002050281	female	61	Gynecology	20240718	negative	1030467286
1002050353	female	50	Gynecology	20240423	negative	1029287583
1002053400	female	39	Gynecology	20240724	negative	1030563755
1002053547	female	34	Gynecology	20240502	negative	1029404962
1002054913	female	23	Gynecology	20240704	negative	1030267622
1002056106	female	53	Reproductive Gynecology	20240727	negative	1030622755
1002057824	female	26	Gynecology	20240219	negative	1028403308
1002060244	female	53	Reproductive Gynecology	20240605	negative	1029873666
1002062632	female	47	Gynecology	20240223	negative	1028473884
1002062687	female	56	Gynecology	20240522	negative	1029677415
1002064049	female	37	Gynecology	20240626	negative	1030158947
1002064522	female	48	Reproductive Gynecology	20240312	negative	1028714621
1002064949	female	32	Reproductive Gynecology	20240227	negative	1028520704
1002065086	female	38	Reproductive Gynecology	20240420	negative	1029255348
1002065741	female	29	Reproductive Gynecology	20240229	negative	1028555586
1002067985	female	68	Gynecology	20240202	negative	1028267208
1002068824	female	36	Gynecology	20240305	negative	1028619868
1002070660	female	32	Gynecology	20240131	negative	1028228616
1002075381	female	60	Reproductive Gynecology	20240530	negative	1029791709
1002077036	female	44	Reproductive Gynecology	20240524	negative	1029705790
1002078337	female	47	Gynecology	20240410	negative	1029111093
1002080484	female	42	Gynecology	20240408	negative	1029077443
1002082421	female	29	Gynecology	20240605	negative	1029868286
1002083956	female	32	Gynecology	20240118	negative	1028071811
1002084114	female	37	Gynecology	20240513	negative	1029539542
1002086727	female	45	Gynecology	20240618	negative	1030026411
1002088362	female	45	Gynecology	20240716	negative	1030437989
1002088875	female	56	Gynecology	20240315	negative	1028761475
1002089339	female	38	Gynecology	20240502	negative	1029405493
1002089841	female	28	Gynecology	20240418	negative	1029222901
1002091149	female	36	Gynecology	20240402	negative	1029004472
1002092370	female	23	Gynecology	20240410	negative	1029111521
1002096357	female	35	Reproductive Gynecology	20240117	negative	1028049538
1002096357	female	35	Reproductive Gynecology	20240403	negative	1029021810
1002097701	female	35	Gynecology	20240727	negative	1030616473
1002098659	female	44	Gynecology	20240413	negative	1029151674
1002101754	female	47	Gynecology	20240711	negative	1030367548
1002103728	female	35	Reproductive Gynecology	20240731	negative	1030670016
1002106194	female	77	Reproductive Gynecology	20240110	negative	1027962033
1002111158	female	32	Gynecology	20240320	negative	1028836427
1002112515	female	45	Gynecology	20240330	negative	1028977867
1002112723	female	54	Gynecology	20240305	negative	1028608994
1002115442	female	56	Gynecology	20240329	negative	1028959947
1002115680	female	35	Gynecology	20240515	negative	1029572110
1002119414	female	64	Gynecology	20240126	negative	1028180161
1002119750	female	40	Gynecology	20240601	negative	1029812778
1002120734	female	45	Gynecology	20240410	negative	1029106416
1002121415	female	69	Gynecology	20240326	negative	1028914253
1002121497	female	34	Gynecology	20240327	negative	1028930535
1002122261	female	26	Reproductive Gynecology	20240517	negative	1029606135
1002126705	female	55	Gynecology	20240406	negative	1029054533
1002126930	female	46	Gynecology	20240424	negative	1029303950
1002128383	female	53	Gynecology	20240319	negative	1028815696
1002128617	female	30	Gynecology	20240426	negative	1029338082
1002128809	female	47	Gynecology	20240423	negative	1029289457
1002131484	female	31	Reproductive Gynecology	20240305	negative	1028611804
1002132744	female	38	Gynecology	20240705	negative	1030285867
1002134131	female	54	Gynecology	20240726	negative	1030597699
1002136764	female	40	Gynecology	20240528	negative	1029759573
1002137788	female	57	Gynecology	20240116	negative	1028029305
1002138222	female	58	Reproductive Gynecology	20240222	positive	1028457321
1002139245	female	34	Gynecology	20240607	negative	1029895133
1002139670	female	63	Gynecology	20240327	negative	1028930199
1002140774	female	39	Gynecology	20240111	negative	1027974063
1002140792	female	45	Gynecology	20240301	negative	1028564979
1002140833	female	55	Gynecology	20240429	negative	1029366965
1002141408	female	50	Gynecology	20240411	negative	1029123740
1002143029	female	51	Gynecology	20240322	negative	1028863264
1002145241	female	31	Gynecology	20240424	negative	1029307474
1002145285	female	47	Gynecology	20240105	negative	1027898298
1002147285	female	52	Gynecology	20240221	negative	1028439354
1002147864	female	38	Gynecology	20240507	negative	1029457692
1002148364	female	38	Reproductive Gynecology	20240731	negative	1030674532
1002151430	female	44	Gynecology	20240315	negative	1028761589
1002151806	female	43	Reproductive Gynecology	20240424	negative	1029300437
1002156617	female	28	Gynecology	20240628	negative	1030188013
1002160039	female	51	Gynecology	20240604	negative	1029842824
1002162030	female	31	Reproductive Gynecology	20240123	negative	1028122706
1002164858	female	42	Reproductive Gynecology	20240713	negative	1030399619
1002165719	female	26	Gynecology	20240124	negative	1028146807
1002167645	female	33	Reproductive Gynecology	20240417	negative	1029204704
1002167755	female	67	Reproductive Gynecology	20240205	negative	1028293266
1002170824	female	49	Gynecology	20240124	negative	1028143182
1002172031	female	28	Gynecology	20240313	negative	1028737227
1002175147	female	48	Gynecology	20240604	negative	1029851852
1002175367	female	51	Gynecology	20240515	negative	1029581208
1002177416	female	42	Gynecology	20240410	negative	1029107520
1002179408	female	52	Reproductive Gynecology	20240517	negative	1029604414
1002179701	female	52	Gynecology	20240205	negative	1028292252
1002183354	female	31	Gynecology	20240308	negative	1028670417
1002184052	female	25	Reproductive Gynecology	20240301	negative	1028572403
1002184125	female	55	Reproductive Gynecology	20240724	negative	1030566810
1002184806	female	35	Gynecology	20240430	negative	1029389760
1002184881	female	37	Gynecology	20240405	negative	1029031788
1002185185	female	22	Gynecology	20240430	negative	1029402931
1002185284	female	36	Reproductive Gynecology	20240104	negative	1027887417
1002185373	female	28	Reproductive Gynecology	20240116	negative	1028037549
1002185892	female	42	Reproductive Gynecology	20240221	positive	1028436299
1002189427	female	29	Gynecology	20240403	negative	1029020723
1002190698	female	51	Gynecology	20240521	negative	1029660462
1002191172	female	46	Reproductive Gynecology	20240429	negative	1029368731
1002191677	female	30	Gynecology	20240530	negative	1029791317
1002192821	female	45	Reproductive Gynecology	20240723	negative	1030548059
1002192882	female	28	Gynecology	20240618	negative	1030035217
1002194081	female	49	Gynecology	20240626	negative	1030157568
1002194853	female	47	Gynecology	20240417	negative	1029207877
1002197528	female	54	Gynecology	20240205	negative	1028293799
1002198799	female	55	Gynecology	20240227	negative	1028513496
1002198934	female	28	Reproductive Gynecology	20240325	negative	1028890971
1002200266	female	33	Gynecology	20240606	negative	1029879206
1002203586	female	57	Gynecology	20240727	negative	1030619429
1002206055	female	57	Gynecology	20240424	negative	1029305683
1002206314	female	42	Reproductive Gynecology	20240709	negative	1030335718
1002207012	female	48	Gynecology	20240618	negative	1030040950
1002207026	female	34	Reproductive Gynecology	20240315	negative	1028762368
1002208233	female	47	Gynecology	20240724	negative	1030560835
1002212688	female	56	Gynecology	20240426	negative	1029336123
1002214871	female	39	Gynecology	20240511	negative	1029520700
1002215003	female	27	Gynecology	20240523	negative	1029694353
1002226035	female	29	Reproductive Gynecology	20240308	negative	1028665908
1002226562	female	39	Gynecology	20240731	negative	1030665872
1002234387	female	28	Gynecology	20240622	negative	1030097332
1002235420	female	25	Gynecology	20240329	negative	1028957896
1002236545	female	28	Reproductive Gynecology	20240604	negative	1029849695
1002236929	female	49	Gynecology	20240403	negative	1029024550
1002238714	female	28	Reproductive Gynecology	20240229	negative	1028556939
1002241842	female	36	Gynecology	20240723	negative	1030550608
1002242604	female	40	Gynecology	20240702	negative	1030232302
1002246684	female	47	Gynecology	20240416	negative	1029189357
1002248220	female	26	Gynecology	20240411	negative	1029127946
1002249507	female	31	Gynecology	20240515	negative	1029570277
1002250244	female	30	Gynecology	20240719	negative	1030496044
1002254810	female	37	Gynecology	20240327	negative	1028927520
1002256513	female	35	Gynecology	20240522	negative	1029674077
1002257405	female	36	Reproductive Gynecology	20240424	negative	1029304274
1002258266	female	62	Reproductive Gynecology	20240126	negative	1028176784
1002264725	female	37	Reproductive Gynecology	20240301	negative	1028566437
1002265502	female	22	Reproductive Gynecology	20240308	negative	1028664233
1002265505	female	29	Gynecology	20240725	negative	1030584139
1002272929	female	30	Gynecology	20240530	negative	1029792396
1002274815	female	45	Gynecology	20240717	negative	1030458646
1002276258	female	47	Gynecology	20240319	negative	1028815569
1002279985	female	34	Gynecology	20240626	negative	1030159243
1002280785	female	26	Gynecology	20240714	negative	1030412309
1002282221	female	30	Reproductive Gynecology	20240430	negative	1029402200
1002283041	female	45	Gynecology	20240309	negative	1028677811
1002283126	female	30	Gynecology	20240316	negative	1028777811
1002284169	female	29	Gynecology	20240326	negative	1028913447
1002285590	female	27	Reproductive Gynecology	20240122	negative	1028108058
1002285662	female	58	Gynecology	20240712	negative	1030381986
1002287211	female	33	Gynecology	20240416	negative	1029190347
1002288415	female	27	Reproductive Gynecology	20240226	negative	1028497773
1002290289	female	35	Reproductive Gynecology	20240308	negative	1028669556
1002290497	female	55	Gynecology	20240718	negative	1030475752
1002293027	female	23	Gynecology	20240419	negative	1029239721
1002293393	female	27	Reproductive Gynecology	20240221	negative	1028437825
1002294007	female	39	Gynecology	20240126	negative	1028177342
1002294014	female	35	Gynecology	20240516	negative	1029598461
1002296965	female	60	Gynecology	20240508	negative	1029473409
1002297295	female	30	Reproductive Gynecology	20240320	negative	1028830617
1002298718	female	27	Gynecology	20240714	negative	1030412193
1002299855	female	52	Gynecology	20240719	negative	1030495733
1002303045	female	72	Reproductive Gynecology	20240125	negative	1028164371
1002304432	female	36	Reproductive Gynecology	20240302	negative	1028587928
1002305377	female	49	Gynecology	20240730	negative	1030659005
1002305890	female	39	Reproductive Gynecology	20240725	negative	1030586921
1002307236	female	32	Gynecology	20240118	negative	1028073315
1002307887	female	32	Gynecology	20240509	negative	1029495615
1002308099	female	26	Reproductive Gynecology	20240307	negative	1028654491
1002308883	female	41	Gynecology	20240528	negative	1029751635
1002310265	female	45	Gynecology	20240606	negative	1029884221
1002315455	female	21	Gynecology	20240124	negative	1028143276
1002315500	female	29	Gynecology	20240227	negative	1028509219
1002316162	female	42	Gynecology	20240523	negative	1029691347
1002316631	female	31	Gynecology	20240330	negative	1028969955
1002317374	female	27	Gynecology	20240523	negative	1029691850
1002317394	female	45	Gynecology	20240417	negative	1029206193
1002318607	female	32	Gynecology	20240528	negative	1029756618
1002321115	female	51	Gynecology	20240111	negative	1027972027
1002323045	female	28	Gynecology	20240220	negative	1028419580
1002324944	female	54	Gynecology	20240424	negative	1029300885
1002325258	female	53	Reproductive Gynecology	20240223	negative	1028467876
1002326670	female	28	Reproductive Gynecology	20240209	negative	1028337441
1002327218	female	37	Reproductive Gynecology	20240329	negative	1028959744
1002327810	female	57	Gynecology	20240524	negative	1029702489
1002329935	female	41	Gynecology	20240626	negative	1030157640
1002330328	female	28	Gynecology	20240405	negative	1029039797
1002331046	female	34	Reproductive Gynecology	20240402	negative	1029008755
1002333412	female	46	Gynecology	20240510	negative	1029512505
1002338448	female	43	Gynecology	20240510	negative	1029512097
1002338727	female	37	Gynecology	20240731	negative	1030676839
1002339603	female	52	Gynecology	20240718	negative	1030471017
1002340473	female	47	Reproductive Gynecology	20240613	negative	1029974879
1002340872	female	34	Gynecology	20240112	negative	1027988594
1002340872	female	34	Gynecology	20240515	negative	1029576782
1002341609	female	44	Gynecology	20240227	negative	1028517032
1002346050	female	36	Gynecology	20240221	negative	1028433047
1002346231	female	34	Gynecology	20240222	negative	1028450185
1002346912	female	36	Gynecology	20240220	negative	1028421965
1002348493	female	56	Gynecology	20240326	negative	1028913456
1002349120	female	45	Gynecology	20240302	negative	1028582343
1002350242	female	48	Gynecology	20240604	negative	1029849561
1002350802	female	61	Gynecology	20240507	negative	1029445007
1002352112	female	34	Gynecology	20240426	negative	1029339093
1002352342	female	38	Gynecology	20240724	negative	1030558947
1002352716	female	35	Gynecology	20240628	negative	1030190624
1002353447	female	28	Gynecology	20240301	negative	1028564668
1002353896	female	39	Gynecology	20240724	negative	1030564903
1002354778	female	23	Reproductive Gynecology	20240616	negative	1030013568
1002357329	female	41	Gynecology	20240326	negative	1028912231
1002357453	female	28	Reproductive Gynecology	20240604	negative	1029847106
1002358060	female	33	Reproductive Gynecology	20240228	negative	1028531951
1002359097	female	55	Reproductive Gynecology	20240207	negative	1028315701
1002361937	female	36	Gynecology	20240411	negative	1029129068
1002364264	female	30	Reproductive Gynecology	20240530	negative	1029793553
1002369449	female	41	Gynecology	20240329	negative	1028954893
1002370392	female	33	Gynecology	20240327	negative	1028927275
1002371000	female	54	Gynecology	20240705	negative	1030286347
1002371958	female	59	Gynecology	20240606	negative	1029887977
1002373193	female	49	Gynecology	20240417	negative	1029208254
1002373208	female	23	Gynecology	20240417	negative	1029210116
1002373424	female	30	Gynecology	20240523	negative	1029693797
1002375324	female	31	Reproductive Gynecology	20240626	negative	1030149139
1002375568	男	56	Hepatobiliary and Pancreatic Surgery Department	20240416	negative	1029184580
1002377043	female	61	Reproductive Gynecology	20240723	negative	1030549576
1002377045	female	53	Reproductive Gynecology	20240723	negative	1030547782
1002378515	female	29	Gynecology	20240315	negative	1028767520
1002380547	female	39	Reproductive Gynecology	20240330	negative	1028975718
1002382067	female	36	Gynecology	20240116	negative	1028031117
1002383184	female	25	Reproductive Gynecology	20240518	negative	1029622542
1002383615	female	68	Reproductive Gynecology	20240621	negative	1030090424
1002384513	female	35	Gynecology	20240516	negative	1029597917
1002384736	female	35	Gynecology	20240313	negative	1028732753
1002386035	female	32	Reproductive Gynecology	20240621	negative	1030087041
1002388921	female	50	Gynecology	20240607	negative	1029904517
1002389506	female	37	Reproductive Gynecology	20240229	negative	1028556085
1002389788	female	48	Gynecology	20240327	negative	1028931301
1002391960	female	47	Gynecology	20240316	negative	1028784164
1002393569	female	48	Gynecology	20240606	negative	1029880050
1002394658	female	28	Gynecology	20240527	negative	1029732736
1002394829	female	45	Gynecology	20240319	negative	1028812361
1002395586	female	53	Gynecology	20240224	negative	1028487210
1002397642	female	51	Gynecology	20240429	negative	1029375267
1002397642	female	51	Gynecology	20240730	negative	1030657829
1002400539	female	47	Gynecology	20240323	negative	1028882946
1002400689	female	40	Gynecology	20240722	negative	1030518997
1002401048	female	32	Gynecology	20240627	negative	1030175322
1002408776	female	25	Gynecology	20240312	negative	1028718871
1002409850	female	25	Reproductive Gynecology	20240709	negative	1030331423
1002417101	female	59	Gynecology	20240514	negative	1029563413
1002421003	female	30	Gynecology	20240315	negative	1028762698
1002423579	female	47	Gynecology	20240524	negative	1029710670
1002423904	female	39	Gynecology	20240430	negative	1029401137
1002426952	female	40	Gynecology	20240220	negative	1028426621
1002427247	female	42	Reproductive Gynecology	20240106	negative	1027917653
1002427409	female	26	Gynecology	20240426	negative	1029337815
1002427782	female	56	Gynecology	20240405	negative	1029037113
1002428288	female	31	Gynecology	20240424	negative	1029301487
1002429331	female	27	Gynecology	20240322	negative	1028860248
1002432060	female	34	Reproductive Gynecology	20240316	negative	1028778032
1002432219	female	57	Gynecology	20240626	negative	1030158826
1002434240	female	39	Gynecology	20240724	negative	1030563382
1002435931	female	26	Gynecology	20240430	negative	1029389653
1002436443	female	35	Gynecology	20240123	negative	1028133638
1002439801	female	29	Gynecology	20240227	negative	1028521418
1002440189	female	20	Gynecology	20240126	negative	1028180337
1002440242	female	28	Reproductive Gynecology	20240329	negative	1028957654
1002442817	female	33	Reproductive Gynecology	20240430	negative	1029399095
1002442876	female	46	Reproductive Gynecology	20240606	negative	1029888314
1002444213	female	39	Gynecology	20240117	negative	1028051218
1002446690	female	56	Gynecology	20240126	negative	1028178881
1002449160	female	37	Gynecology	20240321	negative	1028852557
1002454485	female	59	Gynecology	20240723	negative	1030547619
1002455173	female	27	Gynecology	20240612	negative	1029954567
1002455725	female	38	Reproductive Gynecology	20240731	negative	1030673233
1002456687	female	22	Reproductive Gynecology	20240402	negative	1029006976
1002457969	female	38	Reproductive Gynecology	20240109	negative	1027943309
1002458939	female	29	Gynecology	20240402	negative	1029008934
1002459121	female	39	Gynecology	20240223	negative	1028469980
1002462042	female	51	Reproductive Gynecology	20240614	negative	1029990584
1002463381	female	57	Gynecology	20240112	negative	1027985467
1002465312	female	44	Gynecology	20240221	negative	1028436413
1002466643	female	47	Gynecology	20240423	negative	1029281471
1002468093	female	34	Reproductive Gynecology	20240702	negative	1030235842
1002470105	female	22	Gynecology	20240105	negative	1027905329
1002470355	female	33	Gynecology	20240131	negative	1028235666
1002474522	female	43	Gynecology	20240227	negative	1028509404
1002478109	female	47	Gynecology	20240426	negative	1029338696
1002481238	female	41	Gynecology	20240320	negative	1028832551
1002481732	female	32	Reproductive Gynecology	20240516	negative	1029597595
1002485237	female	39	Gynecology	20240412	negative	1029144193
1002487220	female	58	Gynecology	20240410	negative	1029112572
1002488253	female	38	Gynecology	20240314	negative	1028753568
1002490850	female	36	Reproductive Gynecology	20240731	negative	1030676086
1002492155	female	42	Gynecology	20240717	negative	1030458171
1002501258	female	34	Gynecology	20240719	negative	1030492314
1002501291	female	64	Gynecology	20240206	negative	1028310241
1002501943	female	45	Reproductive Gynecology	20240725	negative	1030583998
1002503664	female	47	Gynecology	20240219	negative	1028406773
1002503867	female	34	Gynecology	20240319	negative	1028809378
1002504148	female	50	Gynecology	20240411	negative	1029121936
1002508645	female	30	Gynecology	20240110	negative	1027963189
1002508722	female	61	Reproductive Gynecology	20240618	negative	1030040617
1002512051	female	30	Reproductive Gynecology	20240423	negative	1029288667
1002516744	female	33	Reproductive Gynecology	20240112	negative	1027994209
1002517748	female	47	Gynecology	20240429	negative	1029369991
1002520291	female	34	Gynecology	20240722	negative	1030528672
1002521161	female	36	Reproductive Gynecology	20240423	negative	1029287752
1002524453	female	62	Gynecology	20240105	negative	1027899896
1002525042	female	53	Gynecology	20240723	negative	1030547866
1002526881	female	59	Gynecology	20240601	negative	1029819816
1002530199	female	32	Reproductive Gynecology	20240227	negative	1028511019
1002531693	female	50	Gynecology	20240530	negative	1029782691
1002538135	female	53	Gynecology	20240605	negative	1029869312
1002539993	female	30	Gynecology	20240626	negative	1030154026
1002540015	female	53	Gynecology	20240430	negative	1029400948
1002540088	female	40	Reproductive Gynecology	20240116	negative	1028039933
1002543613	female	33	Reproductive Gynecology	20240302	negative	1028578806
1002546116	female	42	Gynecology	20240417	negative	1029208637
1002546827	female	53	Reproductive Gynecology	20240330	negative	1028973638
1002552765	female	28	Gynecology	20240328	negative	1028943398
1002552914	female	46	Gynecology	20240711	negative	1030370910
1002554430	female	42	Reproductive Gynecology	20240516	negative	1029592427
1002558876	female	25	Gynecology	20240311	negative	1028692250
1002560439	female	23	Gynecology	20240607	negative	1029895310
[truncated: 56,981 more rows]

## Sheet: HPV18+
Patient ID	Patient Gender	Patient Age	Department	Test Date	Result	Barcode
0102673423	female	29	Gynecology	20240502	positive	1029405770
0124005628	female	53	Gynecology	20240312	positive	1028713065
1000032754	female	54	Gynecology	20240523	positive	1029689018
1000125964	female	62	Gynecology	20240704	positive	1030268289
1000202116	female	45	Gynecology	20240130	positive	1028222303
1000224941	female	37	Reproductive Gynecology	20240518	positive	1029622576
1000376379	female	51	Gynecology	20240522	positive	1029671931
1000570246	female	57	Gynecology	20240605	positive	1029871473
1000589574	female	45	Gynecology	20240312	positive	1028716709
1000733570	female	48	Gynecology	20240523	positive	1029692444
1001449106	female	31	Gynecology	20240309	positive	1028685558
1001465239	female	34	Gynecology	20240515	positive	1029580907
1001533811	female	31	Gynecology	20240315	positive	1028765568
1001708172	female	34	Gynecology	20240527	positive	1029731833
1001760978	female	56	Gynecology	20240604	positive	1029845601
1001786104	female	56	Gynecology	20240220	positive	1028425807
1001790279	female	21	Gynecology	20240423	positive	1029274385
1001882832	female	27	Gynecology	20240618	positive	1030040951
1002017555	female	36	Gynecology	20240326	positive	1028911800
1002139245	female	34	Gynecology	20240607	positive	1029895133
1002184052	female	25	Reproductive Gynecology	20240301	positive	1028572403
1002455725	female	38	Reproductive Gynecology	20240731	positive	1030673233
1002501291	female	64	Gynecology	20240206	positive	1028310241
1002631719	female	17	Gynecology	20240229	positive	1028553637
1002708814	female	30	Reproductive Gynecology	20240724	positive	1030557459
1002721477	female	64	Gynecology	20240522	positive	1029677585
1002790238	female	24	Gynecology	20240221	positive	1028440377
1002963695	female	28	Gynecology	20240716	positive	1030424276
1003097282	female	27	Reproductive Gynecology	20240308	positive	1028662255
1003143313	female	41	Reproductive Gynecology	20240308	positive	1028666295
1003377672	female	45	Reproductive Gynecology	20240117	positive	1028050004
1003399515	female	38	Gynecology	20240604	positive	1029852651
1003448022	female	31	Gynecology	20240618	positive	1030037603
1003519757	female	50	Gynecology	20240205	positive	1028292464
1003558591	female	56	Gynecology	20240521	positive	1029657098
1003687082	female	40	Gynecology	20240510	positive	1029510898
1003769908	female	20	Gynecology	20240306	positive	1028634511
1003785132	female	27	Gynecology	20240308	positive	1028669614
1003796151	female	53	Gynecology	20240228	positive	1028539883
1003925644	female	40	Gynecology	20240423	positive	1029288375
1004023014	female	43	Gynecology	20240625	positive	1030142951
1004024182	female	48	Gynecology	20240426	positive	1029334901
1004074884	female	39	Gynecology	20240104	positive	1027891287
1004076244	female	35	Reproductive Gynecology	20240103	positive	1027874662
1004140500	female	28	Reproductive Gynecology	20240219	positive	1028396372
1004146279	female	18	Gynecology	20240223	positive	1028473873
1004146463	female	31	Reproductive Gynecology	20240612	positive	1029953885
1004148747	female	63	Gynecology	20240301	positive	1028567705
1004156276	female	49	Gynecology	20240507	positive	1029443397
1004169438	female	47	Gynecology	20240320	positive	1028827466
1004194638	female	34	Reproductive Gynecology	20240328	positive	1028945032
1004231811	female	19	Reproductive Gynecology	20240422	positive	1029265423
1004240402	female	47	Gynecology	20240429	positive	1029371370
1004265499	female	32	Gynecology	20240513	positive	1029534286
1004266349	female	54	Gynecology	20240513	positive	1029536436
1004298752	female	60	Gynecology	20240604	positive	1029854533
1004304793	female	27	Reproductive Gynecology	20240607	positive	1029901482
1004325708	female	27	Gynecology	20240621	positive	1030089018
1004330088	female	47	Gynecology	20240628	positive	1030189411
1004374312	female	49	Reproductive Gynecology	20240723	positive	1030548863
0000099350	female	44	Gynecology	20231216	positive	1027669432
0000099676	female	54	Gynecology	20231103	positive	1027140322
0112020113	female	60	Gynecology	20230413	positive	1024671408
1000050052	female	44	Reproductive Gynecology	20231227	positive	1027803610
1000232679	female	30	Reproductive Gynecology	20230527	positive	1025204243
1000325457	female	31	Gynecology	20230530	positive	1025230185
1000348985	female	44	Gynecology	20230321	positive	1024386394
1000348985	female	45	Gynecology	20231121	positive	1027349097
1000356210	female	38	Gynecology	20230926	positive	1026716735
1000380700	female	49	Gynecology	20230609	positive	1025362925
1000406676	female	29	Gynecology	20230817	positive	1026241118
1000425280	female	32	Gynecology	20230314	positive	1024286373
1000530953	female	27	Gynecology	20231019	positive	1026949472
1000556891	female	31	Gynecology	20230316	positive	1024325080
1000608616	female	25	Gynecology	20230908	positive	1026510887
1000611701	female	30	Gynecology	20230718	positive	1025840258
1000669951	female	38	Gynecology	20231116	positive	1027297850
1000672406	female	52	Gynecology	20230307	positive	1024207211
1000723956	female	23	Gynecology	20230107	positive	1023542487
1000934766	female	33	Gynecology	20230908	positive	1026508303
1000975298	female	44	Gynecology	20230131	positive	1023751368
1001014206	female	33	Gynecology	20230316	positive	1024324471
1001056292	female	36	Gynecology	20230510	positive	1024989025
1001093233	female	33	Gynecology	20230510	positive	1024989503
1001164653	female	32	Reproductive Gynecology	20230107	positive	1023535869
1001237326	female	26	Gynecology	20231108	positive	1027200014
1001253193	female	38	Gynecology	20230718	positive	1025835109
1001318785	female	27	Gynecology	20230424	positive	1024799191
1001342857	female	53	Gynecology	20230609	positive	1025362378
1001377310	female	29	Gynecology	20230427	positive	1024853947
1001383035	female	24	Gynecology	20230314	positive	1024297649
1001427437	female	26	Reproductive Gynecology	20230404	positive	1024555822
1001472559	female	49	Gynecology	20231108	positive	1027201142
1001485234	female	57	Gynecology	20231026	positive	1027036981
1001533224	female	29	Reproductive Gynecology	20230817	positive	1026236831
1001606692	female	47	Gynecology	20230905	positive	1026464273
1001612387	female	31	Reproductive Gynecology	20230517	positive	1025072423
1001633168	female	31	Reproductive Gynecology	20230222	positive	1024038175
1001754897	female	60	Reproductive Gynecology	20230719	positive	1025858576
1001760978	female	55	Gynecology	20230906	positive	1026478486
1001760978	female	55	Gynecology	20231206	positive	1027545924
1001882832	female	26	Gynecology	20230824	positive	1026332374
1001903724	female	61	Gynecology	20230328	positive	1024464208
1001957482	female	43	Gynecology	20230316	positive	1024321491
1001997613	female	55	Gynecology	20230705	positive	1025665934
1002022125	female	25	Gynecology	20230407	positive	1024586813
1002045268	female	28	Reproductive Gynecology	20230203	positive	1023793849
1002074400	female	55	Gynecology	20230802	positive	1026047768
1002124736	female	58	Gynecology	20231121	positive	1027355509
1002189256	female	30	Gynecology	20230222	positive	1024044890
1002736232	female	28	Gynecology	20230418	positive	1024721913
1002736232	female	28	Gynecology	20231107	positive	1027177007
1002763458	female	35	Gynecology	20230228	positive	1024119914
1002845982	female	48	Gynecology	20230418	positive	1024720231
1002845982	female	48	Gynecology	20231219	positive	1027692407
1002867139	female	55	Gynecology	20230601	positive	1025256791
1002952747	female	53	Gynecology	20230906	positive	1026480762
1003005903	female	31	Gynecology	20230815	positive	1026208980
1003138344	female	32	Gynecology	20230511	positive	1025000210
1003143849	female	27	Gynecology	20230927	positive	1026731572
1003191350	female	24	Gynecology	20230725	positive	1025935353
1003238499	female	40	Gynecology	20230901	positive	1026419152
1003315480	female	26	Gynecology	20231024	positive	1027006474
1003450768	female	35	Gynecology	20230628	positive	1025583915
1003505340	female	46	Gynecology	20230228	positive	1024118380
1003546014	female	24	Reproductive Gynecology	20230227	positive	1024096635
1003555435	female	47	Gynecology	20230110	positive	1023560568
1003562901	female	68	Gynecology	20230117	positive	1023642437
1003571530	female	44	Gynecology	20230130	positive	1023736326
1003573013	female	40	Gynecology	20230228	positive	1024118042
1003581810	female	64	Gynecology	20230206	positive	1023820135
1003592116	female	47	Gynecology	20230726	positive	1025950689
1003598905	female	33	Reproductive Gynecology	20230320	positive	1024362873
1003601634	female	49	Gynecology	20230608	positive	1025349137
1003621106	female	33	Gynecology	20230328	positive	1024475089
1003640238	female	31	Gynecology	20230908	positive	1026509548
1003642813	female	25	Reproductive Gynecology	20230413	positive	1024662229
1003643556	female	37	Gynecology	20230317	positive	1024336957
1003647948	female	23	Gynecology	20230321	positive	1024377446
1003655225	female	55	Gynecology	20231206	positive	1027547197
1003655546	female	34	Gynecology	20230324	positive	1024431118
1003668218	female	39	Gynecology	20231017	positive	1026925626
1003672842	female	39	Gynecology	20230418	positive	1024728340
1003680522	female	59	Gynecology	20230411	positive	1024629457
1003692383	female	34	Gynecology	20230420	positive	1024758630
1003696336	female	31	Reproductive Gynecology	20230422	positive	1024787699
1003696782	female	37	Gynecology	20230425	positive	1024816219
1003703988	female	29	Gynecology	20230425	positive	1024824020
1003709794	female	54	Gynecology	20230505	positive	1024920889
1003719854	female	69	Gynecology	20230510	positive	1024989310
1003730274	female	51	Gynecology	20230516	positive	1025047847
1003731236	female	46	Gynecology	20230519	positive	1025106804
1003735082	female	65	Gynecology	20230527	positive	1025201091
1003765826	female	26	Gynecology	20230821	positive	1026279717
1003787320	female	33	Gynecology	20230926	positive	1026714826
1003806644	female	27	Gynecology	20231025	positive	1027029148
1003834047	female	55	Gynecology	20231205	positive	1027529865
1003851378	female	45	Gynecology	20230728	positive	1025987643
1003900235	female	52	Gynecology	20230909	positive	1026524527
1003906174	female	37	Gynecology	20230829	positive	1026385291
1003925644	female	39	Gynecology	20231101	positive	1027104867
1003940635	female	26	Gynecology	20231017	positive	1026920023
1003972516	female	54	Gynecology	20231020	positive	1026965374
1003980682	female	36	Gynecology	20231025	positive	1027025496
1003981153	female	52	Gynecology	20231025	positive	1027028799
1003984225	female	37	Gynecology	20231026	positive	1027043671
1003992310	female	28	Gynecology	20231101	positive	1027109275
1004007732	female	36	Gynecology	20231115	positive	1027288993
1004024731	female	36	Reproductive Gynecology	20231202	positive	1027500223
1004024984	female	38	Reproductive Gynecology	20231128	positive	1027441337
1004030877	female	49	Gynecology	20231129	positive	1027458002
5012161117	female	56	Gynecology	20230201	positive	1023761318
5300-0000131141	female	48	Reproductive Gynecology	20230721	positive	1025884846
5300-0000847841	female	29	Reproductive Gynecology	20230616	positive	1025452631
5303-5030502284	female	27	Gynecology	20230825	positive	1026338472
5306-0627012002	female	72	Reproductive Gynecology	20230222	positive	1024047100
0102574016	female	31	Gynecology	20220402	positive	1019590674
0103019326	female	41	Gynecology	20220316	positive	1019375368
0103229814	female	44	Gynecology	20221021	positive	1022536095
0103295795	female	37	Reproductive Gynecology	20221228	positive	1023437514
0111067109	female	51	Gynecology	20221021	positive	1022539281
0129011588	female	68	Gynecology	20220616	positive	1020572575
0154057931	female	29	Reproductive Gynecology	20220409	positive	1019663734
0181077498	female	66	Gynecology	20220420	positive	1019803038
0181110226	female	37	Gynecology	20220324	positive	1019475345
1000015453	female	25	Gynecology	20220423	positive	1019844419
1000038059	female	34	Gynecology	20220810	positive	1021413072
1000138465	female	42	Gynecology	20220105	positive	1018512348
1000154012	female	45	Gynecology	20220324	positive	1019475510
1000175868	female	32	Gynecology	20220112	positive	1018598107
1000249204	female	28	Gynecology	20220309	positive	1019289440
1000348985	female	43	Gynecology	20220217	positive	1019005151
1000392387	female	43	Gynecology	20220716	positive	1021013254
1000422110	female	36	Reproductive Gynecology	20220614	positive	1020530976
1000456739	female	41	Gynecology	20221227	positive	1023428189
1000530953	female	26	Gynecology	20220721	positive	1021089887
1000661860	female	22	Gynecology	20220207	positive	1018846564
1000719839	female	30	Reproductive Gynecology	20220622	positive	1020658095
1000737697	female	65	Gynecology	20220301	positive	1019174862
1000745232	female	30	Gynecology	20220324	positive	1019475091
1000819630	female	34	Gynecology	20220224	positive	1019101228
1001003535	female	48	Gynecology	20221101	positive	1022705893
1001015757	female	40	Gynecology	20220831	positive	1021760666
1001026804	female	40	Gynecology	20220310	positive	1019302277
1001036817	female	43	Gynecology	20220107	positive	1018543102
1001053233	female	27	Gynecology	20220906	positive	1021850834
1001053233	female	27	Gynecology	20221102	positive	1022726553
1001105185	female	52	Gynecology	20220217	positive	1019010955
1001129721	female	31	Gynecology	20220107	positive	1018543609
1001260621	female	48	Gynecology	20220407	positive	1019634979
1001320773	female	33	Gynecology	20220714	positive	1020982500
1001342857	female	53	Gynecology	20220923	positive	1022137159
1001383035	female	23	Gynecology	20220226	positive	1019137942
1001474526	female	35	Gynecology	20220712	positive	1020948122
1001485019	female	39	Gynecology	20220526	positive	1020287103
1001532803	female	26	Gynecology	20220728	positive	1021208485
1001583803	female	29	Gynecology	20220112	positive	1018600517
1001592006	female	43	Gynecology	20220519	positive	1020192647
1001647865	female	21	Gynecology	20220425	positive	1019866282
1001654339	female	44	Gynecology	20220113	positive	1018604758
1001684551	female	48	Gynecology	20220528	positive	1020317506
1001719998	female	44	Gynecology	20220215	positive	1018977650
1001735811	female	38	Gynecology	20220206	positive	1018843288
1001735811	female	38	Gynecology	20220802	positive	1021283155
1001754897	female	58	Reproductive Gynecology	20220210	positive	1018907229
1001754897	female	59	Reproductive Gynecology	20220818	positive	1021554906
1001787837	female	54	Gynecology	20220414	positive	1019726685
1001788447	female	39	Gynecology	20220420	positive	1019794293
1001814332	female	43	Reproductive Gynecology	20220726	positive	1021169952
1001882973	female	30	Gynecology	20220525	positive	1020273209
1001895361	female	54	Gynecology	20220318	positive	1019409829
1001999934	female	50	Gynecology	20220331	positive	1019559877
1002042439	female	34	Gynecology	20220212	positive	1018940858
1002078744	female	51	Gynecology	20220618	positive	1020604525
1002108183	female	34	Gynecology	20220212	positive	1018939118
1002134994	female	25	Gynecology	20220323	positive	1019461477
1002134994	female	26	Gynecology	20221110	positive	1022857406
1002189256	female	29	Gynecology	20220510	positive	1020063903
1002197965	female	26	Gynecology	20220623	positive	1020673361
1002299751	female	22	Reproductive Gynecology	20220916	positive	1022022093
1002303892	female	30	Gynecology	20220112	positive	1018598854
1002370608	female	42	Gynecology	20220208	positive	1018869155
1002382818	female	42	Gynecology	20220125	positive	1018746735
1002386383	female	78	Gynecology	20220526	positive	1020289058
1002399042	female	46	Reproductive Gynecology	20220119	positive	1018679198
1002428240	female	40	Gynecology	20221206	positive	1023264119
1002467579	female	40	Reproductive Gynecology	20220726	positive	1021165160
1002478499	female	30	Gynecology	20220804	positive	1021317947
1002536362	female	27	Gynecology	20220607	positive	1020437746
1002561726	female	36	Gynecology	20220113	positive	1018612920
1002571022	female	37	Gynecology	20220413	positive	1019710561
1002574142	female	31	Gynecology	20221208	positive	1023295602
1002641431	female	44	Gynecology	20221025	positive	1022595034
1002651077	female	53	Gynecology	20220702	positive	1020802201
1002692153	female	22	Gynecology	20220114	positive	1018626921
1002724174	female	23	Gynecology	20220422	positive	1019828109
1002753171	female	49	Gynecology	20220105	positive	1018511768
1002773922	female	60	Gynecology	20220727	positive	1021182817
1002775512	female	43	Gynecology	20220310	positive	1019308805
1002780524	female	32	Gynecology	20220105	positive	1018508207
1002789207	female	40	Gynecology	20220115	positive	1018640631
1002790753	female	25	Gynecology	20220111	positive	1018584071
1002824188	female	25	Gynecology	20221215	positive	1023357838
1002845982	female	47	Gynecology	20220309	positive	1019286650
1002850206	female	53	Gynecology	20220212	positive	1018935236
1002851551	female	26	Reproductive Gynecology	20220211	positive	1018924148
1002880570	female	30	Gynecology	20220223	positive	1019085130
1002882648	female	27	Gynecology	20220226	positive	1019135151
1002894616	female	51	Gynecology	20220830	positive	1021743798
1002903913	female	24	Reproductive Gynecology	20220830	positive	1021745666
1002930206	female	24	Gynecology	20220317	positive	1019397586
1002931344	female	30	Gynecology	20220318	positive	1019405815
1002933685	female	51	Gynecology	20220324	positive	1019476290
1002945453	female	32	Gynecology	20220420	positive	1019800120
1002950742	female	74	Gynecology	20220330	positive	1019548649
1002951802	female	30	Gynecology	20220531	positive	1020349498
1002955841	female	40	Gynecology	20220401	positive	1019575843
1002967263	female	35	Reproductive Gynecology	20220722	positive	1021111958
1002983402	female	18	Gynecology	20220527	positive	1020304545
1002986506	female	27	Gynecology	20221118	positive	1023000244
1003007734	female	18	Gynecology	20220429	positive	1019930543
1003012379	female	44	Gynecology	20221109	positive	1022837062
1003025821	female	33	Reproductive Gynecology	20220506	positive	1020009506
1003026491	female	41	Gynecology	20220506	positive	1020009659
1003026536	female	40	Gynecology	20220513	positive	1020109761
1003028155	female	48	Gynecology	20220823	positive	1021636903
1003043800	female	56	Gynecology	20220514	positive	1020129132
1003056277	female	21	Gynecology	20220521	positive	1020215660
1003057309	female	30	Gynecology	20220524	positive	1020249291
1003057309	female	30	Gynecology	20220630	positive	1020775368
1003057309	female	30	Gynecology	20221122	positive	1023070539
1003063420	female	56	Gynecology	20220524	positive	1020253769
1003087287	female	25	Gynecology	20220624	positive	1020688140
1003087461	female	21	Gynecology	20220606	positive	1020409860
1003097550	female	29	Gynecology	20220610	positive	1020484239
1003107447	female	46	Gynecology	20220614	positive	1020529576
1003135959	female	18	Reproductive Gynecology	20220715	positive	1021004405
1003145174	female	52	Gynecology	20220706	positive	1020859802
1003157434	female	52	Gynecology	20220705	positive	1020841299
1003160597	female	54	Gynecology	20220706	positive	1020858767
1003173473	female	27	Gynecology	20220714	positive	1020987936
1003211823	female	28	Gynecology	20220723	positive	1021137509
1003232862	female	53	Gynecology	20220728	positive	1021212635
1003233083	female	47	Gynecology	20220803	positive	1021303422
1003249537	female	45	Gynecology	20220809	positive	1021392609
1003268955	female	21	Gynecology	20221010	positive	1022381051
1003333592	female	24	Gynecology	20220831	positive	1021758777
1003364576	female	22	Gynecology	20221210	positive	1023313566
1003369729	female	18	Gynecology	20220920	positive	1022082712
1003410866	female	52	Gynecology	20221006	positive	1022333738
1003425012	female	40	Gynecology	20221018	positive	1022491836
1003429861	female	56	Gynecology	20221020	positive	1022527170
1003431790	female	31	Gynecology	20221025	positive	1022595667
1003437973	female	49	Gynecology	20221108	positive	1022821753
1003440853	female	43	Gynecology	20221115	positive	1022930831
1003446748	female	51	Gynecology	20221029	positive	1022663577
1003464655	female	48	Gynecology	20221108	positive	1022819435
1003474071	female	58	Gynecology	20221115	positive	1022945950
1003489325	female	42	Gynecology	20221123	positive	1023089619
1003490042	female	65	Gynecology	20221122	positive	1023072129
1003495506	female	40	Gynecology	20221123	positive	1023092454
5300-0000812600	female	34	Gynecology	20220118	positive	1018667870
5306-0627012002	female	71	Reproductive Gynecology	20220608	positive	1020447668
5327-5270761243	female	65	Gynecology	20220215	positive	1018969736
0000210264	female	39	Reproductive Gynecology	20211116	positive	1017930381
0102479222	female	31	Gynecology	20210402	positive	1015292860
0102644135	female	32	Gynecology	20210929	positive	1017391133
0102673898	female	34	Reproductive Gynecology	20210501	positive	1015632134
0112020362	female	66	Gynecology	20210409	positive	1015372355
0112324643	female	38	Reproductive Gynecology	20210720	positive	1016540980
0113009764	female	53	Reproductive Gynecology	20211016	positive	1017573412
1000030180	female	43	Gynecology	20210624	positive	1016230312
1000034099	female	42	Gynecology	20210804	positive	1016731911
1000042464	female	28	Gynecology	20210127	positive	1014587128
1000050215	female	51	Gynecology	20211125	positive	1018043205
1000056188	female	34	Gynecology	20211029	positive	1017727942
1000089793	female	28	Gynecology	20210317	positive	1015098933
1000089793	female	28	Gynecology	20211203	positive	1018130189
1000138465	female	41	Gynecology	20210323	positive	1015159386
1000157570	female	30	Gynecology	20211020	positive	1017615559
1000175868	female	32	Gynecology	20211001	positive	1017421187
1000199224	female	33	Gynecology	20210621	positive	1016180472
1000232679	female	28	Reproductive Gynecology	20210713	positive	1016443441
1000234576	female	38	Gynecology	20210113	positive	1014436186
1000251084	female	31	Reproductive Gynecology	20210325	positive	1015202307
1000265198	female	33	Gynecology	20210812	positive	1016830406
1000291288	female	28	Gynecology	20211014	positive	1017551299
1000292869	female	22	Gynecology	20210309	positive	1014998489
1000292869	female	22	Gynecology	20210528	positive	1015927279
1000348985	female	42	Gynecology	20210325	positive	1015194606
1000392387	female	42	Gynecology	20210309	positive	1014993777
1000425280	female	30	Gynecology	20210119	positive	1014495268
1000565995	female	32	Gynecology	20210106	positive	1014366743
1000578180	female	34	Gynecology	20210605	positive	1016019872
1000588451	female	29	Gynecology	20210803	positive	1016710744
1000590238	female	44	Gynecology	20210603	positive	1015994494
1000619709	female	33	Gynecology	20210510	positive	1015702935
1000662570	female	41	Gynecology	20211208	positive	1018186795
1000663761	female	34	Gynecology	20210623	positive	1016214953
1000698374	female	30	Gynecology	20210421	positive	1015509527
1000715018	female	48	Gynecology	20210521	positive	1015846507
1000756548	female	53	Gynecology	20210928	positive	1017383596
1000808420	female	40	Gynecology	20210630	positive	1016294503
1000815479	female	35	Gynecology	20210327	positive	1015222458
1000973881	female	25	Gynecology	20210623	positive	1016213721
1001003535	female	47	Gynecology	20211012	positive	1017521197
1001015757	female	39	Gynecology	20210819	positive	1016916675
1001020070	female	24	Gynecology	20211123	positive	1018019845
1001026804	female	40	Gynecology	20210619	positive	1016169027
1001030557	female	58	Gynecology	20210818	positive	1016896691
1001037539	female	29	Gynecology	20210121	positive	1014524347
1001041841	female	23	Gynecology	20210206	positive	1014693415
1001045532	female	54	Reproductive Gynecology	20210414	positive	1015427726
1001060068	female	34	Gynecology	20210205	positive	1014685115
1001101344	female	39	Gynecology	20210105	positive	1014344726
1001121475	female	35	Gynecology	20210430	positive	1015618822
1001127710	female	43	Gynecology	20211015	positive	1017564029
1001149550	female	32	Reproductive Gynecology	20210121	positive	1014525786
1001153171	female	37	Gynecology	20211106	positive	1017828894
1001177962	female	41	Gynecology	20210130	positive	1014623480
1001186006	female	48	Gynecology	20210630	positive	1016289578
1001250218	female	27	Gynecology	20210318	positive	1015115772
1001252804	female	45	Gynecology	20210518	positive	1015806935
1001291685	female	40	Gynecology	20210319	positive	1015129585
1001305532	female	39	Gynecology	20210520	positive	1015835825
1001376056	female	27	Reproductive Gynecology	20211130	positive	1018090686
1001383035	female	23	Gynecology	20211028	positive	1017718363
1001396296	female	56	Gynecology	20210423	positive	1015535937
1001396296	female	56	Gynecology	20210721	positive	1016553690
1001396296	female	56	Gynecology	20211229	positive	1018442362
1001415806	female	42	Gynecology	20210925	positive	1017343521
1001419519	female	34	Gynecology	20210402	positive	1015290150
1001451815	female	32	Gynecology	20210126	positive	1014569987
1001461954	female	30	Gynecology	20210114	positive	1014451541
1001465239	female	31	Gynecology	20210224	positive	1014844138
1001465239	female	31	Reproductive Gynecology	20210827	positive	1017018537
1001472134	female	58	Gynecology	20211215	positive	1018273610
1001492872	female	33	Gynecology	20210427	positive	1015584433
1001559482	female	31	Gynecology	20210727	positive	1016629380
1001600196	female	57	Gynecology	20210318	positive	1015112631
1001626294	female	26	Gynecology	20211014	positive	1017546241
1001656581	female	34	Gynecology	20211019	positive	1017605398
1001676786	female	41	Gynecology	20210611	positive	1016081522
1001676786	female	42	Gynecology	20211013	positive	1017529391
1001684285	female	39	Gynecology	20210111	positive	1014411137
1001684551	female	47	Gynecology	20210918	positive	1017279326
1001684551	female	48	Gynecology	20211225	positive	1018399642
1001732651	female	59	Gynecology	20210728	positive	1016646011
1001754897	female	58	Reproductive Gynecology	20210928	positive	1017380798
1001761953	female	36	Gynecology	20210113	positive	1014432068
1001761953	female	36	Gynecology	20210602	positive	1015974496
1001771917	female	28	Gynecology	20210208	positive	1014708546
1001780649	female	46	Gynecology	20210420	positive	1015495549
1001799178	female	40	Gynecology	20210115	positive	1014463932
1001812460	female	30	Gynecology	20210115	positive	1014464298
1001820625	female	23	Gynecology	20210204	positive	1014673137
1001827621	female	54	Gynecology	20210324	positive	1015187204
1001827621	female	55	Gynecology	20211222	positive	1018355579
1001830271	female	35	Gynecology	20210514	positive	1015766277
1001853494	female	21	Gynecology	20210227	positive	1014886467
1001876149	female	28	Gynecology	20210128	positive	1014598184
1001897613	female	25	Gynecology	20210324	positive	1015183484
1001897613	female	25	Gynecology	20210612	positive	1016101164
1001911187	female	49	Gynecology	20210107	positive	1014375657
1001940722	female	38	Gynecology	20211223	positive	1018368751
1001960286	female	42	Gynecology	20210306	positive	1014973253
1001986791	female	31	Gynecology	20210519	positive	1015816508
1001986791	female	31	Gynecology	20210908	positive	1017155443
1001993966	female	21	Gynecology	20210326	positive	1015209370
1002022591	female	31	Reproductive Gynecology	20211014	positive	1017548607
1002030685	female	22	Gynecology	20210608	positive	1016046504
1002030685	female	23	Gynecology	20211110	positive	1017871033
1002037272	female	36	Gynecology	20210331	positive	1015268490
1002039160	female	61	Gynecology	20210804	positive	1016733279
1002044923	female	45	Gynecology	20210622	positive	1016199670
1002073532	female	37	Gynecology	20210107	positive	1014376047
1002074400	female	53	Gynecology	20210112	positive	1014424084
1002078116	female	50	Gynecology	20210511	positive	1015720940
1002102415	female	30	Gynecology	20210327	positive	1015227193
1002103157	female	30	Gynecology	20210330	positive	1015243989
1002103157	female	30	Gynecology	20211014	positive	1017543910
1002125560	female	49	Gynecology	20210330	positive	1015242675
1002128734	female	39	Gynecology	20210819	positive	1016913711
1002133769	female	42	Reproductive Gynecology	20210709	positive	1016400890
1002141495	female	35	Gynecology	20210102	positive	1014326536
1002150751	female	28	Gynecology	20210111	positive	1014411179
1002168389	female	23	Reproductive Gynecology	20210121	positive	1014524664
1002168389	female	24	Gynecology	20210819	positive	1016913816
1002170543	female	23	Gynecology	20210126	positive	1014569715
1002170543	female	23	Gynecology	20210610	positive	1016075653
1002176879	female	20	Gynecology	20210804	positive	1016733455
1002178203	female	28	Gynecology	20210127	positive	1014588801
1002187774	female	49	Gynecology	20210202	positive	1014647792
1002193926	female	28	Gynecology	20210210	positive	1014727095
1002199097	female	22	Gynecology	20210226	positive	1014874901
1002215864	female	29	Gynecology	20210224	positive	1014843737
1002221483	female	24	Gynecology	20210325	positive	1015198667
1002222193	female	46	Gynecology	20210302	positive	1014905487
1002228501	female	53	Gynecology	20210309	positive	1014988642
1002229790	female	26	Reproductive Gynecology	20210302	positive	1014909352
1002247312	female	23	Gynecology	20210312	positive	1015046256
1002249229	female	52	Gynecology	20210312	positive	1015044984
1002252554	female	37	Gynecology	20210316	positive	1015074152
1002259440	female	33	Gynecology	20210318	positive	1015113535
1002259744	female	43	Gynecology	20210318	positive	1015116106
1002263740	female	33	Gynecology	20210812	positive	1016827214
1002276825	female	56	Reproductive Gynecology	20210330	positive	1015253538
1002278749	female	45	Gynecology	20210826	positive	1017005048
1002280411	female	29	Gynecology	20210331	positive	1015266361
1002288004	female	31	Gynecology	20210612	positive	1016093776
1002292013	female	44	Gynecology	20210407	positive	1015342196
1002300532	female	32	Gynecology	20210607	positive	1016028972
1002301028	female	23	Gynecology	20211211	positive	1018223151
1002305891	female	51	Gynecology	20210415	positive	1015444175
1002312296	female	27	Reproductive Gynecology	20211104	positive	1017796888
1002315133	female	24	Gynecology	20210427	positive	1015580630
1002321516	female	29	Gynecology	20211227	positive	1018406259
1002323045	female	25	Gynecology	20210814	positive	1016855995
1002323755	female	50	Gynecology	20210427	positive	1015582985
1002325905	female	43	Gynecology	20210428	positive	1015589936
1002325941	female	49	Gynecology	20211010	positive	1017493517
1002326905	female	40	Gynecology	20210428	positive	1015598728
1002338159	female	19	Gynecology	20210519	positive	1015821604
1002345965	female	65	Gynecology	20210511	positive	1015726049
1002353174	female	32	Gynecology	20210616	positive	1016118249
1002355840	female	33	Gynecology	20210520	positive	1015834221
1002355840	female	33	Gynecology	20211117	positive	1017948475
1002369641	female	51	Gynecology	20210601	positive	1015960603
1002377491	female	32	Gynecology	20210601	positive	1015967217
1002377491	female	32	Gynecology	20211104	positive	1017797333
1002378500	female	41	Gynecology	20210602	positive	1015983972
1002389140	female	28	Reproductive Gynecology	20211023	positive	1017658388
1002397795	female	49	Gynecology	20210616	positive	1016130266
1002397851	female	42	Gynecology	20210922	positive	1017300813
1002400006	female	31	Gynecology	20210616	positive	1016125204
1002400006	female	31	Gynecology	20210812	positive	1016832256
1002416427	female	34	Gynecology	20211111	positive	1017885576
1002417650	female	47	Gynecology	20210626	positive	1016256153
1002420231	female	51	Gynecology	20210707	positive	1016376577
1002420938	female	30	Gynecology	20210629	positive	1016277719
1002422946	female	47	Gynecology	20210630	positive	1016296462
1002425734	female	23	Reproductive Gynecology	20210701	positive	1016311397
1002445692	female	45	Gynecology	20210713	positive	1016438366
1002447413	female	53	Gynecology	20210724	positive	1016596762
1002450691	female	43	Gynecology	20210714	positive	1016467427
1002461524	female	37	Gynecology	20210720	positive	1016535831
1002468369	female	33	Gynecology	20210722	positive	1016570492
1002470105	female	20	Gynecology	20210907	positive	1017142585
1002475338	female	24	Gynecology	20210816	positive	1016869194
1002484776	female	35	Gynecology	20210729	positive	1016662229
1002487220	female	55	Gynecology	20210730	positive	1016676482
1002497483	female	32	Gynecology	20210814	positive	1016854265
1002504938	female	19	Gynecology	20210807	positive	1016775162
1002507603	female	57	Gynecology	20210810	positive	1016797297
1002511333	female	32	Reproductive Gynecology	20210811	positive	1016814314
1002514153	female	23	Reproductive Gynecology	20211013	positive	1017533644
1002517280	female	46	Gynecology	20210813	positive	1016848547
1002521940	female	41	Gynecology	20210817	positive	1016880270
1002531457	female	25	Reproductive Gynecology	20210821	positive	1016945446
1002550192	female	21	Gynecology	20210914	positive	1017226084
1002564475	female	29	Gynecology	20210915	positive	1017240083
1002572750	female	27	Gynecology	20210910	positive	1017187291
1002587944	female	32	Gynecology	20211016	positive	1017577307
1002595233	female	32	Gynecology	20210928	positive	1017377414
1002604594	female	55	Gynecology	20210930	positive	1017408870
1002613389	female	39	Gynecology	20211013	positive	1017531611
1002615607	female	29	Gynecology	20211008	positive	1017462270
1002615766	female	21	Gynecology	20211019	positive	1017603559
1002620558	female	41	Gynecology	20211010	positive	1017494976
1002624645	female	51	Gynecology	20211020	positive	1017615740
1002625719	female	54	Reproductive Gynecology	20211013	positive	1017530722
1002629863	female	41	Gynecology	20211019	positive	1017599664
1002630044	female	57	Gynecology	20211015	positive	1017558705
1002634379	female	49	Gynecology	20211018	positive	1017582128
1002651892	female	32	Gynecology	20211028	positive	1017716928
1002653704	female	41	Gynecology	20211028	positive	1017717641
1002656719	female	27	Gynecology	20211102	positive	1017771891
1002664689	female	39	Gynecology	20211103	positive	1017786998
1002695793	female	29	Gynecology	20211126	positive	1018052775
1002700234	female	20	Gynecology	20211125	positive	1018040770
1002700873	female	41	Gynecology	20211124	positive	1018027439
1002702321	female	54	Gynecology	20211125	positive	1018043294
1002706112	female	27	Gynecology	20211229	positive	1018439467
1002707396	female	58	Gynecology	20211215	positive	1018271625
1002714143	female	27	Gynecology	20211130	positive	1018092303
1002717997	female	21	Gynecology	20211203	positive	1018131337
1002732645	female	27	Gynecology	20211209	positive	1018204230
1002737920	female	49	Gynecology	20211214	positive	1018255920
1002756637	female	29	Gynecology	20211228	positive	1018423315
1002775706	female	61	Gynecology	20211231	positive	1018470417
5300-0000610670	female	35	Gynecology	20211106	positive	1017829986
5304-0423052840	female	29	Gynecology	20210624	positive	1016228978
	female	34		20210330	positive	7100777290
0101076836	female	49	Gynecology	20201021	positive	1013575244
0102166110	female	50	Gynecology	20200818	positive	1012956701
0102539188	female	29	Gynecology	20200513	positive	1011941894
0103097822	female	49	Gynecology	20200618	positive	1012285851
0103127595	female	44	Gynecology	20200312	positive	1011413761
0103127595	female	44	Gynecology	20200723	positive	1012695924
0103165648	female	51	Gynecology	20200702	positive	1012501909
0103185552	female	38	Gynecology	20200203	positive	1011239251
0111229130	female	33	Gynecology	20201127	positive	1013965012
0112310954	female	34	Gynecology	20200307	positive	1011379578
0113036808	female	46	Gynecology	20201030	positive	1013668432
1000021683	female	34	Gynecology	20201125	positive	1013943331
1000042464	female	28	Gynecology	20201012	positive	1013463449
1000084383	female	53	Gynecology	20201104	positive	1013714755
1000113351	female	24	Gynecology	20200501	positive	1011848743
1000113351	female	24	Gynecology	20200919	positive	1013287087
1000120028	female	31	Gynecology	20200826	positive	1013046232
1000127345	female	30	Gynecology	20201029	positive	1013657672
1000138465	female	41	Gynecology	20201031	positive	1013677636
1000199224	female	32	Gynecology	20200622	positive	1012313054
1000199224	female	32	Gynecology	20201214	positive	1014131590
1000201341	female	40	Gynecology	20200409	positive	1011639380
1000209000	female	29	Gynecology	20200609	positive	1012193998
1000228999	female	41	Gynecology	20200825	positive	1013027972
1000325819	female	32	Gynecology	20200827	positive	1013059804
1000348947	female	28	Gynecology	20201103	positive	1013705929
1000348985	female	41	Gynecology	20200806	positive	1012828595
1000392387	female	41	Gynecology	20200924	positive	1013334951
1000437882	female	30	Gynecology	20201028	positive	1013648548
1000442538	female	30	Gynecology	20201117	positive	1013852854
1000588451	female	28	Reproductive Gynecology	20200826	positive	1013042836
1000590238	female	44	Gynecology	20201024	positive	1013607853
1000593023	female	34	Gynecology	20200415	positive	1011695797
1000670161	female	27	Gynecology	20201210	positive	1014099787
1000725913	female	48	Reproductive Gynecology	20201024	positive	1013608949
1000795277	female	29	Gynecology	20200507	positive	1011885039
1000819499	female	47	Gynecology	20200717	positive	1012640372
1000895854	female	40	Gynecology	20200410	positive	1011655639
1000933409	female	39	Gynecology	20200313	positive	1011425940
1000943533	female	26	Gynecology	20200911	positive	1013211758
1000988810	female	49	Gynecology	20200519	positive	1011994473
1001003535	female	46	Gynecology	20201118	positive	1013865098
1001003640	female	35	Gynecology	20200829	positive	1013087130
1001010858	female	28	Gynecology	20200904	positive	1013144461
1001017400	female	24	Gynecology	20201111	positive	1013794513
1001039814	female	52	Gynecology	20200616	positive	1012257146
1001060458	female	37	Gynecology	20200708	positive	1012549298
1001096393	female	28	Gynecology	20200717	positive	1012638646
1001118039	female	41	Gynecology	20200528	positive	1012086970
1001139495	female	26	Gynecology	20200922	positive	1013308360
1001142519	female	54	Gynecology	20201021	positive	1013573761
1001149550	female	31	Reproductive Gynecology	20200416	positive	1011709839
1001177962	female	40	Gynecology	20200928	positive	1013370535
1001181768	female	27	Gynecology	20201123	positive	1013912308
1001250218	female	27	Gynecology	20201224	positive	1014250109
1001256692	female	45	Gynecology	20200508	positive	1011895335
1001260621	female	46	Gynecology	20200602	positive	1012127369
1001291685	female	39	Gynecology	20201028	positive	1013646726
1001320766	female	49	Gynecology	20201204	positive	1014039810
1001324325	female	24	Gynecology	20201030	positive	1013672033
1001339462	female	32	Gynecology	20201215	positive	1014142898
1001363858	female	34	Gynecology	20200422	positive	1011761252
1001396296	female	55	Gynecology	20200924	positive	1013332507
1001415806	female	41	Gynecology	20200730	positive	1012758815
1001475888	female	22	Gynecology	20200901	positive	1013102853
1001479157	female	49	Gynecology	20200902	positive	1013120721
1001524934	female	34	Gynecology	20200403	positive	1011594314
1001544679	female	55	Gynecology	20200408	positive	1011630854
1001581151	female	36	Gynecology	20200416	positive	1011707333
1001587375	female	33	Gynecology	20200812	positive	1012897429
1001656581	female	32	Gynecology	20200617	positive	1012270191
1001669967	female	36	Gynecology	20200704	positive	1012524797
1001670525	female	24	Reproductive Gynecology	20200108	positive	1011070139
1001674995	female	52	Gynecology	20200529	positive	1012092816
1001683380	female	27	Gynecology	20200117	positive	1011158798
1001687794	female	35	Gynecology	20200120	positive	1011183471
1001699196	female	31	Gynecology	20200220	positive	1011297476
1001701857	female	67	Gynecology	20200305	positive	1011364166
1001704899	female	55	Gynecology	20200708	positive	1012557581
1001719042	female	31	Reproductive Gynecology	20200319	positive	1011470864
1001719998	female	42	Gynecology	20200317	positive	1011451804
1001723629	female	48	Gynecology	20200320	positive	1011481299
1001735811	female	36	Gynecology	20200331	positive	1011567119
1001739453	female	30	Reproductive Gynecology	20200403	positive	1011596978
1001743125	female	58	Gynecology	20200408	positive	1011625958
1001745620	female	39	Gynecology	20200409	positive	1011639500
1001755045	female	28	Reproductive Gynecology	20200416	positive	1011708594
1001755800	female	35	Gynecology	20200416	positive	1011710101
1001755884	female	23	Gynecology	20200416	positive	1011710727
1001757423	female	23	Gynecology	20200526	positive	1012064062
1001760390	female	37	Gynecology	20200421	positive	1011748943
1001760542	female	33	Gynecology	20200928	positive	1013369948
1001764966	female	65	Reproductive Gynecology	20200724	positive	1012706516
1001771863	female	22	Gynecology	20200429	positive	1011829813
1001772586	female	51	Gynecology	20200430	positive	1011839461
1001773267	female	38	Gynecology	20200501	positive	1011848446
1001780649	female	46	Gynecology	20201215	positive	1014148389
1001781929	female	29	Gynecology	20200508	positive	1011896340
1001791229	female	54	Gynecology	20200526	positive	1012063628
1001796971	female	43	Gynecology	20200519	positive	1011992986
1001803633	female	36	Gynecology	20200523	positive	1012039832
1001809258	female	18	Gynecology	20200527	positive	1012076594
1001810254	female	59	Gynecology	20200606	positive	1012170787
1001813779	female	23	Gynecology	20200530	positive	1012108911
1001820586	female	38	Reproductive Gynecology	20200604	positive	1012152959
1001827621	female	54	Gynecology	20200930	positive	1013392140
1001830271	female	34	Gynecology	20201208	positive	1014069256
1001832554	female	22	Gynecology	20200612	positive	1012230975
1001840651	female	33	Reproductive Gynecology	20200618	positive	1012286460
1001845054	female	27	Reproductive Gynecology	20200623	positive	1012324969
1001847775	female	49	Gynecology	20200722	positive	1012681449
1001848133	female	19	Gynecology	20200624	positive	1012338364
1001857752	female	23	Gynecology	20200702	positive	1012505387
1001858204	female	24	Gynecology	20200702	positive	1012504441
1001863276	female	26	Gynecology	20201211	positive	1014108014
1001868757	female	44	Gynecology	20200709	positive	1012567046
1001868757	female	44	Gynecology	20201203	positive	1014026936
1001880910	female	21	Gynecology	20200718	positive	1012647394
1001897613	female	24	Gynecology	20200729	positive	1012753026
1001907091	female	36	Gynecology	20201113	positive	1013817559
1001910217	female	30	Gynecology	20200805	positive	1012822983
1001912847	female	19	Gynecology	20200807	positive	1012849060
1001926132	female	33	Gynecology	20201223	positive	1014231516
1001928363	female	41	Gynecology	20200814	positive	1012921552
1001957482	female	41	Gynecology	20200828	positive	1013072817
1001958540	female	47	Gynecology	20200828	positive	1013076114
1001995743	female	33	Gynecology	20200923	positive	1013323403
1001999934	female	49	Gynecology	20200926	positive	1013357877
1002022967	female	42	Gynecology	20201014	positive	1013500812
1002037272	female	35	Gynecology	20201023	positive	1013599997
1002044923	female	44	Gynecology	20201028	positive	1013648470
1002048909	female	28	Gynecology	20201225	positive	1014254729
1002049236	female	25	Gynecology	20201031	positive	1013682127
1002056088	female	56	Gynecology	20201104	positive	1013721597
1002064919	female	26	Gynecology	20201110	positive	1013778616
1002091118	female	49	Gynecology	20201127	positive	1013965083
1002093935	female	49	Gynecology	20201202	positive	1014014932
1002098434	female	29	Gynecology	20201202	positive	1014014174
1002098770	female	57	Gynecology	20201209	positive	1014085051
1002102415	female	30	Gynecology	20201204	positive	1014041304
1002104869	female	66	Gynecology	20201209	positive	1014090081
1002106421	female	69	Gynecology	20201210	positive	1014100245
1002116493	female	23	Gynecology	20201216	positive	1014162467
1002119737	female	31	Reproductive Gynecology	20201216	positive	1014161462
1002123209	female	34	Gynecology	20201222	positive	1014213814
1002129400	female	49	Gynecology	20201226	positive	1014264870
1002130861	female	34	Gynecology	20201231	positive	1014316975
1002131668	female	50	Gynecology	20201224	positive	1014249988
5306-0627012002	female	69	Reproductive Gynecology	20200429	positive	1011830177
				20200408	positive	7100666005
1001067658	female	54	Gynecology	20191207	positive	1010802818
1001591292	female	33	Gynecology	20191106	positive	1010533240
1001639133	female	49	Reproductive Gynecology	20191212	positive	1010844863
1001641438	female	44	Reproductive Gynecology	20191214	positive	1010863033
1001654399	female	65	Gynecology	20191225	positive	1010958000
1001660995	female	33	Gynecology	20191231	positive	1011001449

## Sheet: HPV6+
Patient ID	Patient Gender	Patient Age	Department	Test Date	Result	Barcode
0125011661	女	51	Gynecology	20240711	positive	1030362731
1001251655	女	39	Gynecology	20240607	positive	1029897466
1001272294	女	29	Gynecology	20240423	positive	1029288490
1001561716	女	40	Gynecology	20240515	positive	1029578309
1001996999	女	27	Gynecology	20240422	positive	1029265484
1002028433	女	36	Gynecology	20240518	positive	1029627854
1002790238	女	24	Gynecology	20240221	positive	1028440377
1002906908	女	33	Gynecology	20240411	positive	1029123838
1003130645	男	28	Dermatology Department	20240405	positive	1029038062
1003383883	女	26	Gynecology	20240126	positive	1028179315
1003462959	女	28	Gynecology	20240122	positive	1028107171
1003502254	女	31	Gynecology	20240123	positive	1028129529
1003526364	女	19	Gynecology	20240326	positive	1028909679
1003742540	女	32	Gynecology	20240716	positive	1030437551
1003914912	女	28	Gynecology	20240511	positive	1029517111
1004093180	女	23	Gynecology	20240228	positive	1028535911
1004171833	女	28	Gynecology	20240308	positive	1028669937
1004280822	女	46	Gynecology	20240529	positive	1029774861
1004307471	女	47	Gynecology	20240619	positive	1030055988
1004352439	女	28	Reproductive Gynecology	20240719	positive	1030489968
1004355910	女	29	Gynecology	20240710	positive	1030348894
1000027426	女	58	Gynecology	20231122	positive	1027366773
1000232679	女	30	Reproductive Gynecology	20230527	positive	1025204243
1000247043	女	49	Gynecology	20230216	positive	1023966332
1000384693	女	53	Gynecology	20230706	positive	1025688820
1000384693	女	54	Gynecology	20231114	positive	1027261057
1000486097	女	41	Gynecology	20230828	positive	1026366404
1000702122	女	54	Gynecology	20230401	positive	1024532307
1001809731	女	26	Reproductive Gynecology	20230524	positive	1025156043
1001846186	女	26	Gynecology	20230511	positive	1024999169
1002124736	女	58	Gynecology	20231121	positive	1027355509
1002356580	女	47	Gynecology	20230926	positive	1026711661
1002678568	女	50	Reproductive Gynecology	20231205	positive	1027521056
1002905649	女	37	Gynecology	20231115	positive	1027287374
1003352821	女	21	Gynecology	20230209	positive	1023866893
1003422763	女	33	Reproductive Gynecology	20230211	positive	1023907689
1003551174	女	23	Gynecology	20230105	positive	1023517605
1003554541	女	46	Gynecology	20230111	positive	1023581893
1003639514	女	25	Gynecology	20230315	positive	1024307409
1003673070	女	35	Gynecology	20230607	positive	1025327482
1003719854	女	69	Gynecology	20230510	positive	1024989310
1003729882	女	18	Gynecology	20230516	positive	1025061086
1003761550	女	31	Reproductive Gynecology	20230608	positive	1025345817
1003777054	女	23	Gynecology	20230629	positive	1025599693
1003889639	女	23	Gynecology	20230822	positive	1026296218
1003902894	女	19	Gynecology	20230829	positive	1026385187
1003933846	女	52	Gynecology	20231121	positive	1027359672
1003937473	女	57	Gynecology	20230919	positive	1026635680
1003947642	女	31	Gynecology	20230928	positive	1026738129
0101002722	女	52	Gynecology	20220120	positive	1018691327
0101002722	女	52	Gynecology	20220512	positive	1020090015
0101002722	女	53	Gynecology	20221117	positive	1022976473
0112122846	女	43	Gynecology	20220209	positive	1018894167
1000001720	女	51	Gynecology	20220209	positive	1018895007
1000010829	女	42	Reproductive Gynecology	20220509	positive	1020040717
1000014615	女	40	Gynecology	20220119	positive	1018681497
1000134296	女	52	Gynecology	20220629	positive	1020750864
1000395958	女	39	Gynecology	20220331	positive	1019561597
1000436752	女	47	Gynecology	20220429	positive	1019922535
1000702122	女	53	Gynecology	20221018	positive	1022493406
1000702122	女	53	Gynecology	20221227	positive	1023430240
1000720075	女	26	Gynecology	20220317	positive	1019397157
1000990798	女	52	Reproductive Gynecology	20220311	positive	1019323869
1001016708	女	25	Gynecology	20220210	positive	1018906503
1001021424	女	32	Gynecology	20220106	positive	1018526106
1001021424	女	33	Gynecology	20220628	positive	1020739557
1001021751	女	56	Gynecology	20221021	positive	1022538520
1001100308	女	42	Gynecology	20220118	positive	1018668673
1001105423	女	44	Gynecology	20220315	positive	1019369445
1001258828	女	25	Gynecology	20220219	positive	1019043737
1001375976	女	21	Gynecology	20220528	positive	1020315113
1001429204	女	35	Reproductive Gynecology	20221008	positive	1022366387
1001431399	女	65	Gynecology	20220924	positive	1022153353
1001468065	女	53	Gynecology	20220412	positive	1019685078
1001577161	女	30	Reproductive Gynecology	20220113	positive	1018614758
1001586513	女	25	Gynecology	20220426	positive	1019875480
1001606786	女	23	Gynecology	20220311	positive	1019324032
1001665257	女	33	Gynecology	20221021	positive	1022535265
1001666342	女	24	Gynecology	20220811	positive	1021434891
1001704910	女	49	Gynecology	20220629	positive	1020757810
1001706766	女	42	Reproductive Gynecology	20220622	positive	1020652784
1001716545	女	44	Reproductive Gynecology	20220215	positive	1018966474
1001722907	女	49	Gynecology	20220207	positive	1018847625
1001722907	女	49	Gynecology	20220615	positive	1020555332
1001754886	女	35	Gynecology	20220128	positive	1018791902
1001770242	女	27	Gynecology	20220627	positive	1020716000
1001825976	女	24	Gynecology	20220423	positive	1019845063
1001835591	女	27	Gynecology	20220524	positive	1020253770
1001978643	女	64	Reproductive Gynecology	20220622	positive	1020656396
1001985806	女	25	Gynecology	20220512	positive	1020097477
1002102292	女	22	Gynecology	20220924	positive	1022158676
1002307200	女	25	Gynecology	20220111	positive	1018582699
1002335070	女	44	Gynecology	20220215	positive	1018971093
1002353447	女	27	Gynecology	20221103	positive	1022747127
1002408981	女	24	Gynecology	20220324	positive	1019480353
1002510469	女	29	Reproductive Gynecology	20220810	positive	1021410019
1002512393	女	36	Gynecology	20220804	positive	1021318620
1002574142	女	31	Gynecology	20221208	positive	1023295602
1002583679	女	30	Reproductive Gynecology	20221020	positive	1022523719
1002587566	女	24	Gynecology	20220423	positive	1019846905
1002716415	女	20	Gynecology	20220609	positive	1020471940
1002732012	女	23	Gynecology	20220326	positive	1019499998
1002732012	女	24	Gynecology	20221005	positive	1022322653
1002747267	女	20	Gynecology	20220531	positive	1020350100
1002780917	女	24	Gynecology	20220518	positive	1020173489
1002793922	女	28	Gynecology	20220112	positive	1018600412
1002801848	女	54	Gynecology	20220209	positive	1018893364
1002807403	女	37	Gynecology	20220122	positive	1018723783
1002807556	女	51	Gynecology	20220120	positive	1018693866
1002817720	女	20	Gynecology	20220824	positive	1021654632
1002854140	女	28	Gynecology	20220215	positive	1018976463
1002860444	女	25	Gynecology	20220312	positive	1019338207
1002862464	女	35	Gynecology	20220215	positive	1018970961
1002909395	女	25	Gynecology	20220331	positive	1019558423
1002914869	女	49	Gynecology	20220324	positive	1019480814
1002932281	女	35	Gynecology	20220316	positive	1019382420
1002939110	女	22	Gynecology	20220504	positive	1019977487
1002940310	女	18	Gynecology	20220322	positive	1019449731
1002972647	女	62	Gynecology	20220414	positive	1019727573
1003050946	女	46	Gynecology	20221012	positive	1022437118
1003051518	女	20	Gynecology	20220518	positive	1020177127
1003064205	女	53	Gynecology	20221130	positive	1023196850
1003070267	女	34	Gynecology	20220531	positive	1020343872
1003093691	女	19	Gynecology	20220609	positive	1020472954
1003128385	女	24	Gynecology	20220711	positive	1020920076
1003140759	女	31	Gynecology	20220912	positive	1021928825
1003149009	女	22	Gynecology	20220708	positive	1020892400
1003162716	女	20	Gynecology	20220802	positive	1021272897
1003189071	女	30	Gynecology	20220825	positive	1021678276
1003214474	女	27	Gynecology	20220728	positive	1021208925
1003255672	女	62	Gynecology	20220804	positive	1021324349
1003280733	女	22	Gynecology	20220812	positive	1021454569
1003317339	女	24	Gynecology	20221020	positive	1022528588
1003367150	女	45	Gynecology	20220920	positive	1022077432
1003372569	女	60	Gynecology	20220917	positive	1022036443
1003384290	女	33	Gynecology	20220922	positive	1022119582
1003390721	女	58	Gynecology	20220928	positive	1022218665
1003390765	女	44	Gynecology	20220926	positive	1022170120
1003421072	女	36	Gynecology	20221012	positive	1022432941
1003430822	女	34	Gynecology	20221020	positive	1022525563
1003433409	女	28	Gynecology	20221117	positive	1022981466
1003448431	女	21	Gynecology	20221209	positive	1023302800
1003484877	女	32	Gynecology	20221122	positive	1023058145
1003546770	女	20	Gynecology	20221230	positive	1023461063
	女	23		20220303	positive	7100888088
0102127757	女	53	Gynecology	20210119	positive	1014492448
0102314538	女	43	Gynecology	20211231	positive	1018481661
0111187942	女	39	Gynecology	20210306	positive	1014966951
0112020362	女	66	Gynecology	20210409	positive	1015372355
1000001720	女	50	Gynecology	20210421	positive	1015502345
1000020456	女	39	Gynecology	20210414	positive	1015428061
1000020456	女	40	Gynecology	20210630	positive	1016296077
1000076666	女	40	Gynecology	20210616	positive	1016122782
1000185509	女	45	Gynecology	20210818	positive	1016904367
1000233833	女	36	Gynecology	20211231	positive	1018478609
1000273307	女	44	Gynecology	20210709	positive	1016402938
1000364881	女	45	Gynecology	20210720	positive	1016529667
1000421291	女	32	Gynecology	20210331	positive	1015269389
1000423056	女	54	Gynecology	20210414	positive	1015422962
1000436752	女	47	Gynecology	20211124	positive	1018026980
1000843063	女	22	Gynecology	20211110	positive	1017871633
1000886589	女	52	Gynecology	20211106	positive	1017826855
1000900997	女	25	Gynecology	20210325	positive	1015200063
1000941931	女	33	Gynecology	20210524	positive	1015866629
1000964071	女	37	Reproductive Gynecology	20210317	positive	1015095397
1000965982	女	24	Gynecology	20210310	positive	1015016836
1000965982	女	24	Gynecology	20210616	positive	1016129607
1000965982	女	25	Gynecology	20211124	positive	1018031243
1001018745	女	26	Gynecology	20210827	positive	1017017230
1001067679	女	46	Gynecology	20210129	positive	1014610670
1001098943	女	45	Gynecology	20210814	positive	1016859531
1001108745	女	43	Gynecology	20210420	positive	1015486695
1001120901	女	33	Gynecology	20210120	positive	1014512590
1001125702	女	29	Gynecology	20210617	positive	1016146129
1001148725	女	27	Gynecology	20210225	positive	1014861508
1001148725	女	28	Gynecology	20210812	positive	1016833686
1001206775	女	27	Gynecology	20210302	positive	1014911830
1001224961	女	50	Gynecology	20210821	positive	1016943674
1001254390	女	24	Gynecology	20210612	positive	1016101332
1001262779	女	77	Gynecology	20210820	positive	1016932406
1001309258	女	45	Gynecology	20210413	positive	1015408932
1001422495	女	27	Gynecology	20210107	positive	1014382635
1001442195	女	27	Gynecology	20211217	positive	1018300660
1001459159	女	26	Reproductive Gynecology	20210601	positive	1015966556
1001467106	女	45	Gynecology	20211009	positive	1017475292
1001468065	女	52	Gynecology	20210824	positive	1016968912
1001477159	女	43	Gynecology	20210119	positive	1014497345
1001484008	女	58	Gynecology	20210223	positive	1014820564
1001493827	女	28	Gynecology	20210401	positive	1015279544
1001592448	女	54	Gynecology	20211022	positive	1017646620
1001606786	女	22	Gynecology	20210105	positive	1014354201
1001609003	女	46	Gynecology	20210917	positive	1017269967
1001624457	女	24	Gynecology	20210326	positive	1015214834
1001744437	女	26	Reproductive Gynecology	20211116	positive	1017937954
1001755858	女	27	Gynecology	20210207	positive	1014700838
1001767283	女	27	Gynecology	20210309	positive	1014999974
1001767283	女	27	Gynecology	20210526	positive	1015903223
1001835034	女	28	Reproductive Gynecology	20211109	positive	1017855826
1001842551	女	32	Gynecology	20210518	positive	1015801941
1001842977	女	26	Gynecology	20210723	positive	1016580253
1001944980	女	26	Gynecology	20210508	positive	1015692881
1001952859	女	20	Gynecology	20210425	positive	1015560456
1002044184	女	31	Reproductive Gynecology	20210507	positive	1015672079
1002051629	女	25	Gynecology	20210413	positive	1015412444
1002055371	女	32	Gynecology	20210728	positive	1016640127
1002056088	女	56	Gynecology	20210428	positive	1015597068
1002056088	女	57	Gynecology	20210927	positive	1017365310
1002082011	女	25	Gynecology	20210703	positive	1016335753
1002097208	女	41	Gynecology	20210420	positive	1015495081
1002106143	女	53	Gynecology	20211103	positive	1017787156
1002113126	女	25	Reproductive Gynecology	20210619	positive	1016171417
1002130474	女	27	Gynecology	20210414	positive	1015421705
1002148402	女	56	Gynecology	20210610	positive	1016070223
1002148402	女	56	Gynecology	20210930	positive	1017405081
1002155069	女	50	Gynecology	20211026	positive	1017680040
1002157599	女	36	Gynecology	20211019	positive	1017591636
1002159473	女	21	Reproductive Gynecology	20210115	positive	1014462186
1002162220	女	22	Gynecology	20211019	positive	1017591550
1002177470	女	29	Gynecology	20210127	positive	1014581675
1002188115	女	38	Gynecology	20210202	positive	1014650612
1002218116	女	42	Gynecology	20210225	positive	1014859610
1002222512	女	26	Gynecology	20210811	positive	1016817876
1002225599	女	31	Gynecology	20210301	positive	1014896358
1002228431	女	25	Gynecology	20210316	positive	1015079214
1002239375	女	53	Gynecology	20210425	positive	1015557354
1002276953	女	66	Gynecology	20210330	positive	1015251892
1002277310	女	51	Gynecology	20210415	positive	1015443084
1002301513	女	34	Gynecology	20210413	positive	1015412853
1002307236	女	29	Gynecology	20210624	positive	1016229421
1002308515	女	43	Gynecology	20210417	positive	1015468312
1002327066	女	29	Gynecology	20210428	positive	1015597915
1002341901	女	20	Gynecology	20210508	positive	1015694530
1002346256	女	29	Gynecology	20210511	positive	1015725950
1002348001	女	45	Gynecology	20210512	positive	1015739978
1002385397	女	45	Gynecology	20210819	positive	1016915365
1002433341	女	19	Gynecology	20210706	positive	1016362794
1002462435	女	16	Gynecology	20210720	positive	1016532697
1002463132	女	24	Gynecology	20210910	positive	1017186823
1002479149	女	24	Gynecology	20210805	positive	1016745342
1002483657	女	37	Gynecology	20210729	positive	1016658417
1002486707	女	25	Gynecology	20210730	positive	1016675586
1002486991	女	43	Gynecology	20210731	positive	1016683660
1002498539	女	24	Gynecology	20211111	positive	1017882517
1002516450	女	21	Gynecology	20211217	positive	1018302205
1002524084	女	22	Gynecology	20210831	positive	1017059875
1002536362	女	26	Gynecology	20210827	positive	1017013636
1002564475	女	29	Gynecology	20210915	positive	1017240083
1002572569	女	27	Gynecology	20210910	positive	1017188254
1002589302	女	44	Gynecology	20210922	positive	1017301389
1002606253	女	31	Gynecology	20211001	positive	1017422355
1002664774	女	50	Gynecology	20211105	positive	1017815089
1002678666	女	43	Gynecology	20211116	positive	1017933897
1002692210	女	20	Gynecology	20211117	positive	1017953209
1002700234	女	20	Gynecology	20211125	positive	1018040770
1002704741	女	33	Gynecology	20211124	positive	1018029077
1002717997	女	21	Gynecology	20211203	positive	1018131337
1002740550	女	22	Gynecology	20211221	positive	1018333900
1002747136	女	31	Gynecology	20211231	positive	1018481334
1002777187	女	26	Gynecology	20211231	positive	1018481260
5015279886	女	31	Gynecology	20210324	positive	1015183796
5015478918	女	31	Gynecology	20210102	positive	1014324941
5015497879	女	29	Gynecology	20211106	positive	1017829821
5300-0000770898	女	31	Gynecology	20210608	positive	1016046502
5300-0000790622	女	36	Gynecology	20210625	positive	1016240089
5300-0000799853	女	29	Gynecology	20210720	positive	1016529737
5303-0326040993	女	39	Gynecology	20210929	positive	1017398423
0000845215	女	32	Gynecology	20200801	positive	1012784915
0101111517	女	33	Gynecology	20200120	positive	1011182458
0101311794	女	33	Gynecology	20201229	positive	1014285401
0102714429	女	23	Gynecology	20201027	positive	1013632386
0111187942	女	39	Gynecology	20201110	positive	1013770277
1000044781	女	53	Gynecology	20200604	positive	1012148836
1000085421	女	31	Gynecology	20200922	positive	1013312650
1000136811	女	46	Gynecology	20201118	positive	1013867612
1000220032	女	35	Gynecology	20200416	positive	1011710786
1000247923	女	66	Gynecology	20200710	positive	1012576400
1000271532	女	33	Gynecology	20201215	positive	1014143686
1000339089	女	51	Gynecology	20200918	positive	1013277896
1000422787	女	46	Gynecology	20201014	positive	1013499960
1000436752	女	46	Gynecology	20200930	positive	1013389240
1000458967	女	25	Gynecology	20200904	positive	1013141641
1000458967	女	25	Gynecology	20201128	positive	1013975909
1000706007	女	51	Gynecology	20200521	positive	1012019829
1000727307	女	24	Gynecology	20200708	positive	1012557089
1000801436	女	23	Gynecology	20200415	positive	1011699801
1000965982	女	24	Gynecology	20201105	positive	1013732335
1000978989	女	23	Gynecology	20200716	positive	1012633216
1001018745	女	25	Gynecology	20200508	positive	1011899404
1001018745	女	25	Gynecology	20201105	positive	1013730915
1001021751	女	54	Gynecology	20201017	positive	1013532433
1001351862	女	22	Gynecology	20200425	positive	1011797512
1001402434	女	44	Reproductive Gynecology	20201230	positive	1014307347
1001419874	女	47	Gynecology	20201027	positive	1013632440
1001420848	女	24	Gynecology	20200326	positive	1011527284
1001490707	女	39	Gynecology	20200526	positive	1012055329
1001555770	女	32	Gynecology	20201224	positive	1014248440
1001598568	女	25	Gynecology	20201231	positive	1014317686
1001631652	女	19	Gynecology	20201226	positive	1014270962
1001638435	女	29	Reproductive Gynecology	20200511	positive	1011917804
1001639059	女	33	Gynecology	20201118	positive	1013864582
1001689405	女	30	Gynecology	20201008	positive	1013428479
1001695060	女	24	Gynecology	20200204	positive	1011244158
1001714854	女	73	Gynecology	20200314	positive	1011430614
1001715004	女	27	Gynecology	20200314	positive	1011433467
1001720431	女	39	Gynecology	20200821	positive	1012994314
1001734307	女	19	Gynecology	20200403	positive	1011595209
1001735681	女	28	Gynecology	20200617	positive	1012274140
1001743125	女	58	Gynecology	20200408	positive	1011625958
1001754695	女	28	Gynecology	20200416	positive	1011710236
1001754695	女	28	Gynecology	20200813	positive	1012911210
1001757423	女	23	Gynecology	20200526	positive	1012064062
1001759962	女	32	Gynecology	20200421	positive	1011744875
1001771863	女	22	Gynecology	20200429	positive	1011829813
1001789605	女	31	Gynecology	20200515	positive	1011961295
1001807904	女	27	Gynecology	20200526	positive	1012064119
1001834730	女	37	Gynecology	20200620	positive	1012304669
1001837232	女	16	Gynecology	20200701	positive	1012494473
1001840142	女	27	Gynecology	20200619	positive	1012290272
1001847830	女	34	Gynecology	20200930	positive	1013394221
1001847830	女	34	Gynecology	20201106	positive	1013741871
1001849410	女	44	Gynecology	20201120	positive	1013886125
1001854452	女	32	Gynecology	20200701	positive	1012494388
1001873395	女	50	Gynecology	20200716	positive	1012630577
1001877452	女	26	Gynecology	20201029	positive	1013657021
1001877600	女	55	Gynecology	20200716	positive	1012627664
1001888213	女	25	Gynecology	20200731	positive	1012775484
1001895265	女	30	Gynecology	20200728	positive	1012735261
1001897613	女	24	Gynecology	20200729	positive	1012753026
1001903559	女	24	Gynecology	20201231	positive	1014316056
1001921341	女	47	Gynecology	20201225	positive	1014260415
1001930063	女	37	Gynecology	20200815	positive	1012928936
1001931337	女	38	Gynecology	20200815	positive	1012935489
1001940352	女	38	Gynecology	20200819	positive	1012974546
1001940693	女	28	Gynecology	20200820	positive	1012980030
1001960286	女	42	Gynecology	20200829	positive	1013087551
1001965512	女	22	Gynecology	20200903	positive	1013131307
1001965725	女	27	Gynecology	20200903	positive	1013127485
1001980495	女	20	Gynecology	20200912	positive	1013218214
1001980495	女	20	Gynecology	20200914	positive	1013227226
1001983601	女	58	Gynecology	20201023	positive	1013594400
1001986447	女	21	Gynecology	20200917	positive	1013261670
1001996885	女	49	Gynecology	20200926	positive	1013357780
1001999440	女	20	Gynecology	20200925	positive	1013349255
1002003217	女	27	Gynecology	20200928	positive	1013372761
1002004608	女	23	Gynecology	20200929	positive	1013384301
1002031354	女	28	Gynecology	20201020	positive	1013558496
1002055386	女	57	Gynecology	20201104	positive	1013719758
1002056088	女	56	Gynecology	20201104	positive	1013721597
1002064919	女	26	Gynecology	20201110	positive	1013778616
1002082935	女	23	Gynecology	20201121	positive	1013906171
1002084885	女	22	Gynecology	20201124	positive	1013927572
1002096611	女	50	Gynecology	20201205	positive	1014049424
1002098761	女	49	Gynecology	20201204	positive	1014038596
1002104191	女	16	Gynecology	20201205	positive	1014052751
1002130117	女	24	Gynecology	20201223	positive	1014237846
1002130474	女	26	Gynecology	20201230	positive	1014301463
5300-0000379438	女	34	Gynecology	20201020	positive	1013556958
5327-2724000657	女	53	Gynecology	20201201	positive	1013995973
1001593375	女	50	Reproductive Gynecology	20191107	positive	1010548157
1001638607	女	32	Reproductive Gynecology	20191212	positive	1010845328

## Sheet: HPV39+
Patient ID	Patient Gender	Patient Age	Department	Test Date	Result	Barcode
0101325962	female	27	Gynecology	20240202	positive	1028254549
0102502738	female	37	Gynecology	20240525	positive	1029723579
0111245613	female	35	Reproductive Gynecology	20240619	positive	1030045885
0112138788	female	59	Gynecology	20240314	positive	1028744752
0125011661	female	51	Gynecology	20240711	positive	1030362731
1000083720	female	40	Reproductive Gynecology	20240326	positive	1028913838
1000116646	female	42	Gynecology	20240627	positive	1030171561
1000209410	female	41	Gynecology	20240301	positive	1028568195
1000259921	female	30	Reproductive Gynecology	20240403	positive	1029017903
1000304848	female	46	Gynecology	20240328	positive	1028943572
1000358702	female	29	Gynecology	20240410	positive	1029105108
1000416674	female	63	Reproductive Gynecology	20240313	positive	1028734936
1000521985	female	43	Reproductive Gynecology	20240604	positive	1029844676
1000556679	female	28	Reproductive Gynecology	20240706	positive	1030299150
1000767271	female	27	Gynecology	20240510	positive	1029509310
1000902944	female	41	Reproductive Gynecology	20240705	positive	1030277697
1001006140	female	31	Gynecology	20240710	positive	1030350465
1001014206	female	34	Gynecology	20240628	positive	1030191015
1001098559	female	41	Reproductive Gynecology	20240717	positive	1030456135
1001298260	female	32	Gynecology	20240423	positive	1029288890
1001321851	female	28	Gynecology	20240305	positive	1028619918
1001321851	female	29	Gynecology	20240706	positive	1030296778
1001335266	female	59	Gynecology	20240521	positive	1029661812
1001468783	female	29	Gynecology	20240508	positive	1029478175
1001511164	female	44	Gynecology	20240309	positive	1028682247
1001579923	female	32	Gynecology	20240502	positive	1029405040
1001586924	female	52	Gynecology	20240725	positive	1030586379
1001636794	female	29	Gynecology	20240320	positive	1028834338
1001723074	female	28	Gynecology	20240417	positive	1029207973
1001866110	female	51	Reproductive Gynecology	20240626	positive	1030155086
1002024287	female	48	Gynecology	20240328	positive	1028942896
1002145241	female	31	Gynecology	20240424	positive	1029307474
1002172031	female	28	Gynecology	20240313	positive	1028737227
1002185892	female	42	Reproductive Gynecology	20240221	positive	1028436299
1002235420	female	25	Gynecology	20240329	positive	1028957896
1002318607	female	32	Gynecology	20240528	positive	1029756618
1002340872	female	34	Gynecology	20240515	positive	1029576782
1002359097	female	55	Reproductive Gynecology	20240207	positive	1028315701
1002394658	female	28	Gynecology	20240527	positive	1029732736
1002470355	female	33	Gynecology	20240131	positive	1028235666
1002573962	female	51	Gynecology	20240123	positive	1028118716
1002637867	female	28	Gynecology	20240725	positive	1030582189
1002992095	female	69	Reproductive Gynecology	20240508	positive	1029471152
1003085577	female	34	Gynecology	20240720	positive	1030509411
1003120063	female	50	Gynecology	20240229	positive	1028555868
1003165206	female	52	Gynecology	20240329	positive	1028960112
1003207156	female	41	Gynecology	20240727	positive	1030621172
1003419611	female	45	Reproductive Gynecology	20240410	positive	1029105665
1003499420	female	27	Gynecology	20240109	positive	1027946077
1003662432	female	51	Gynecology	20240328	positive	1028945078
1003745516	female	30	Reproductive Gynecology	20240711	positive	1030368419
1003758784	female	39	Reproductive Gynecology	20240507	positive	1029451556
1003773089	female	35	Reproductive Gynecology	20240124	positive	1028149404
1003806407	female	24	Reproductive Gynecology	20240529	positive	1029773046
1003851069	female	59	Gynecology	20240119	positive	1028080486
1003853970	female	76	Reproductive Gynecology	20240702	positive	1030233210
1003892650	female	35	Gynecology	20240424	positive	1029300638
1003988984	female	22	Gynecology	20240411	positive	1029125903
1004055522	female	38	Gynecology	20240326	positive	1028909565
1004088261	female	68	Gynecology	20240120	positive	1028097819
1004109659	female	26	Reproductive Gynecology	20240126	positive	1028175479
1004114093	female	39	Gynecology	20240219	positive	1028400402
1004116242	female	34	Gynecology	20240130	positive	1028218614
1004139373	female	53	Gynecology	20240220	positive	1028414449
1004143744	female	62	Gynecology	20240220	positive	1028426580
1004144616	female	33	Reproductive Gynecology	20240222	positive	1028460200
1004146279	female	18	Gynecology	20240223	positive	1028473873
1004147071	female	43	Gynecology	20240312	positive	1028711062
1004164827	female	60	Gynecology	20240305	positive	1028618779
1004167814	female	61	Reproductive Gynecology	20240614	positive	1029982970
1004207831	female	28	Gynecology	20240408	positive	1029076620
1004208228	female	48	Gynecology	20240509	positive	1029494596
1004208247	female	31	Gynecology	20240408	positive	1029073922
1004225353	female	60	Gynecology	20240416	positive	1029180948
1004227873	female	50	Reproductive Gynecology	20240416	positive	1029188805
1004238833	female	19	Gynecology	20240424	positive	1029307109
1004258607	female	33	Gynecology	20240508	positive	1029477644
1004266871	female	54	Gynecology	20240725	positive	1030582692
1004277171	female	29	Gynecology	20240528	positive	1029745154
1004287791	female	53	Gynecology	20240528	positive	1029747600
1004293631	female	46	Gynecology	20240531	positive	1029799964
1004301241	female	42	Gynecology	20240607	positive	1029905335
1004309539	female	53	Gynecology	20240612	positive	1029953800
1004314752	female	47	Gynecology	20240619	positive	1030055848
1004343843	female	34	Gynecology	20240702	positive	1030237184
1004354750	female	34	Reproductive Gynecology	20240716	positive	1030426810
1004355910	female	29	Gynecology	20240710	positive	1030348894
1004361468	female	48	Gynecology	20240714	positive	1030410034
1004395577	female	49	Gynecology	20240725	positive	1030586333
5010712850	female	43	Gynecology	20240426	positive	1029335361
5013662427	female	47	Gynecology	20240717	positive	1030453521
5300-0000203345	female	76	Gynecology	20240427	positive	1029351640
5300-0000797556	female	34	Gynecology	20240722	positive	1030520273
5300-0000802479	female	32	Gynecology	20240118	positive	1028072046
530102-KM0102103634	female	69	Gynecology	20240103	positive	1027873109
0101321189	female	29	Gynecology	20230912	positive	1026552130
0102050374	female	64	Gynecology	20230829	positive	1026380196
0102502738	female	36	Gynecology	20230104	positive	1023505140
0103367493	female	31	Gynecology	20230309	positive	1024237970
0111210380	female	41	Reproductive Gynecology	20231128	positive	1027436363
0122008838	female	53	Gynecology	20230208	positive	1023858037
1000020242	female	33	Gynecology	20231121	positive	1027350248
1000129991	female	36	Gynecology	20230211	positive	1023907327
1000145512	female	45	Gynecology	20230304	positive	1024174497
1000170118	female	21	Gynecology	20230118	positive	1023650329
1000260553	female	29	Gynecology	20230915	positive	1026591802
1000337933	female	35	Gynecology	20230811	positive	1026162997
1000423515	female	26	Gynecology	20230204	positive	1023812176
1000520976	female	48	Gynecology	20230308	positive	1024226598
1000548392	female	63	Gynecology	20230901	positive	1026423364
1000629223	female	35	Reproductive Gynecology	20230617	positive	1025461512
1000665504	female	37	Gynecology	20231003	positive	1026752742
1000729066	female	27	Gynecology	20230311	positive	1024265559
1000796110	female	24	Reproductive Gynecology	20230304	positive	1024177271
1000898659	female	55	Gynecology	20230606	positive	1025320178
1000902944	female	40	Reproductive Gynecology	20230614	positive	1025423653
1000929484	female	37	Gynecology	20231014	positive	1026892071
1000990745	female	60	Gynecology	20230516	positive	1025060284
1001011429	female	44	Gynecology	20230405	positive	1024577221
1001014206	female	33	Gynecology	20230316	positive	1024324471
1001048904	female	60	Gynecology	20230506	positive	1024939553
1001059999	female	32	Gynecology	20231102	positive	1027124364
1001098559	female	40	Reproductive Gynecology	20230728	positive	1025984406
1001124430	female	55	Gynecology	20231010	positive	1026839483
1001128846	female	44	Reproductive Gynecology	20230823	positive	1026315290
1001136531	female	23	Gynecology	20230323	positive	1024421824
1001265528	female	57	Gynecology	20230905	positive	1026466591
1001425781	female	37	Gynecology	20231206	positive	1027544188
1001458723	female	53	Gynecology	20231114	positive	1027267928
1001469404	female	36	Gynecology	20230711	positive	1025742165
1001488332	female	60	Gynecology	20231117	positive	1027317672
1001530308	female	59	Gynecology	20230208	positive	1023850027
1001568331	female	40	Gynecology	20231101	positive	1027114150
1001589396	female	32	Gynecology	20230928	positive	1026737442
1001622716	female	45	Gynecology	20230628	positive	1025586906
1001733335	female	27	Gynecology	20231025	positive	1027027949
1001766289	female	39	Gynecology	20231021	positive	1026981885
1001838650	female	53	Reproductive Gynecology	20230420	positive	1024759852
1001889203	female	37	Gynecology	20231027	positive	1027054075
1001963447	female	33	Gynecology	20230601	positive	1025265003
1001988697	female	52	Gynecology	20230131	positive	1023752577
1001999407	female	48	Gynecology	20230908	positive	1026509413
1002022125	female	25	Gynecology	20230407	positive	1024586813
1002024364	female	49	Reproductive Gynecology	20231207	positive	1027559287
1002032061	female	54	Gynecology	20230218	positive	1023995562
1002053556	female	52	Gynecology	20230621	positive	1025506927
1002053556	female	53	Gynecology	20231101	positive	1027113337
1002120071	female	30	Gynecology	20230112	positive	1023594333
1002185892	female	41	Reproductive Gynecology	20230721	positive	1025884935
1002301701	female	36	Gynecology	20230915	positive	1026591136
1002359097	female	54	Reproductive Gynecology	20230120	positive	1023666576
1002359097	female	54	Reproductive Gynecology	20230830	positive	1026397142
1002442025	female	25	Gynecology	20230222	positive	1024046482
1002449939	female	26	Gynecology	20230606	positive	1025318648
1002581991	female	45	Gynecology	20230608	positive	1025345261
1002594342	female	56	Reproductive Gynecology	20230720	positive	1025875824
1002663739	female	61	Gynecology	20230714	positive	1025791591
1002698816	female	27	Gynecology	20230520	positive	1025117611
1002744482	female	41	Reproductive Gynecology	20230309	positive	1024233130
1002770247	female	39	Gynecology	20231208	positive	1027568280
1002805440	female	35	Gynecology	20230626	positive	1025551931
1002809464	female	47	Gynecology	20230221	positive	1024018965
1002850777	female	26	Gynecology	20230208	positive	1023855328
1002859539	female	44	Gynecology	20230510	positive	1024981375
1002973443	female	24	Reproductive Gynecology	20230518	positive	1025092261
1002992095	female	67	Reproductive Gynecology	20230421	positive	1024768683
1002992095	female	68	Reproductive Gynecology	20230830	positive	1026395776
1003020531	female	29	Gynecology	20231017	positive	1026923991
1003041482	female	25	Gynecology	20230113	positive	1023600346
1003041482	female	25	Gynecology	20230712	positive	1025759490
1003051557	female	71	Gynecology	20230221	positive	1024024756
1003120063	female	49	Gynecology	20230209	positive	1023875732
1003191350	female	24	Gynecology	20230725	positive	1025935353
1003216112	female	58	Gynecology	20230228	positive	1024118916
1003249101	female	56	Gynecology	20230921	positive	1026662558
1003279708	female	57	Gynecology	20230215	positive	1023949163
1003332708	female	27	Reproductive Gynecology	20230902	positive	1026433455
1003427984	female	27	Gynecology	20230824	positive	1026324351
1003486736	female	33	Gynecology	20231116	positive	1027302350
1003503843	female	65	Reproductive Gynecology	20230726	positive	1025950861
1003504966	female	23	Gynecology	20231010	positive	1026835707
1003522021	female	43	Gynecology	20230207	positive	1023842387
1003538636	female	23	Gynecology	20230411	positive	1024637931
1003542266	female	57	Gynecology	20230413	positive	1024672198
1003548885	female	47	Gynecology	20230129	positive	1023715968
1003550671	female	22	Gynecology	20230105	positive	1023524263
1003571530	female	44	Gynecology	20230130	positive	1023736326
1003576403	female	22	Gynecology	20230211	positive	1023907300
1003580677	female	28	Reproductive Gynecology	20230203	positive	1023795563
1003581713	female	53	Gynecology	20230203	positive	1023792235
1003581805	female	27	Gynecology	20230207	positive	1023841217
1003581810	female	64	Gynecology	20230206	positive	1023820135
1003598927	female	45	Gynecology	20230215	positive	1023949093
1003612360	female	46	Gynecology	20230302	positive	1024142490
1003631144	female	51	Gynecology	20230620	positive	1025486340
1003632686	female	51	Gynecology	20230315	positive	1024311243
1003649616	female	24	Reproductive Gynecology	20230325	positive	1024441605
1003672857	female	64	Gynecology	20230412	positive	1024647443
1003682254	female	45	Gynecology	20230415	positive	1024699660
1003708803	female	45	Gynecology	20230428	positive	1024863150
1003719118	female	51	Gynecology	20230509	positive	1024973186
1003720094	female	28	Gynecology	20230510	positive	1024987545
1003730817	female	47	Gynecology	20230531	positive	1025249178
1003730817	female	47	Gynecology	20230908	positive	1026502376
1003734558	female	27	Reproductive Gynecology	20230921	positive	1026658215
1003735125	female	33	Gynecology	20230518	positive	1025092848
1003736845	female	32	Gynecology	20230519	positive	1025106805
1003742896	female	52	Gynecology	20230523	positive	1025142547
1003751771	female	44	Reproductive Gynecology	20230531	positive	1025248923
1003751771	female	45	Reproductive Gynecology	20231008	positive	1026807723
1003760428	female	27	Gynecology	20230613	positive	1025403653
1003778549	female	32	Gynecology	20230620	positive	1025492357
1003822047	female	41	Gynecology	20231205	positive	1027528655
1003827817	female	33	Reproductive Gynecology	20230825	positive	1026339274
1003828034	female	15	Gynecology	20230719	positive	1025860516
1003838130	female	26	Gynecology	20230725	positive	1025936265
1003842781	female	40	Gynecology	20230804	positive	1026071155
1003851069	female	59	Gynecology	20231103	positive	1027141351
1003862695	female	26	Reproductive Gynecology	20230804	positive	1026077645
1003866295	female	35	Gynecology	20231024	positive	1027012865
1003908213	female	47	Gynecology	20230831	positive	1026407083
1003908976	female	33	Reproductive Gynecology	20230904	positive	1026445062
1003909145	female	56	Gynecology	20230901	positive	1026422912
1003930689	female	59	Gynecology	20230916	positive	1026600072
1003935603	female	23	Gynecology	20230923	positive	1026689935
1003938193	female	53	Gynecology	20230920	positive	1026651258
1003958148	female	55	Gynecology	20231019	positive	1026952426
1003962696	female	51	Gynecology	20231017	positive	1026921696
1003978862	female	33	Gynecology	20231027	positive	1027049811
1003980815	female	37	Gynecology	20231226	positive	1027785043
1003988984	female	22	Gynecology	20231104	positive	1027154843
1004037363	female	36	Gynecology	20231212	positive	1027605856
1004043817	female	34	Gynecology	20231212	positive	1027615924
5306-0627012002	female	72	Reproductive Gynecology	20230222	positive	1024047100
5328-2822007510	female	56	Gynecology	20230506	positive	1024929936
5328-2822007510	female	57	Gynecology	20231110	positive	1027222767
5335-3500000780	female	65	Reproductive Gynecology	20230818	positive	1026253478
0101002722	female	52	Gynecology	20220512	positive	1020090015
0101047949	female	44	Gynecology	20221104	positive	1022765998
0102502738	female	35	Gynecology	20220329	positive	1019530566
0102560751	female	31	Reproductive Gynecology	20220309	positive	1019291656
0102568598	female	30	Reproductive Gynecology	20220531	positive	1020346590
0111253795	female	63	Gynecology	20221110	positive	1022858501
0111266919	female	31	Gynecology	20220512	positive	1020097401
0111316038	female	29	Reproductive Gynecology	20221208	positive	1023290627
0122008838	female	53	Gynecology	20220416	positive	1019751376
1000083720	female	39	Reproductive Gynecology	20221027	positive	1022630891
1000085321	female	34	Gynecology	20220902	positive	1021793548
1000157506	female	54	Gynecology	20221117	positive	1022982219
1000159036	female	32	Gynecology	20220812	positive	1021454898
1000170118	female	21	Gynecology	20220802	positive	1021272546
1000198604	female	33	Gynecology	20220425	positive	1019868530
1000238827	female	46	Gynecology	20220811	positive	1021426470
1000245999	female	36	Gynecology	20220312	positive	1019331440
1000245999	female	36	Gynecology	20220413	positive	1019704579
1000256566	female	41	Gynecology	20221019	positive	1022507569
1000272312	female	52	Gynecology	20220802	positive	1021275632
1000295749	female	21	Gynecology	20220421	positive	1019816242
1000307576	female	49	Gynecology	20220921	positive	1022100241
1000330222	female	40	Gynecology	20220513	positive	1020106505
1000335232	female	33	Gynecology	20221124	positive	1023114050
1000346143	female	29	Gynecology	20220927	positive	1022205971
1000365313	female	25	Gynecology	20220309	positive	1019290479
1000373474	female	57	Reproductive Gynecology	20220518	positive	1020170149
1000374482	female	31	Gynecology	20220509	positive	1020036958
1000376375	female	23	Gynecology	20220208	positive	1018870601
1000407704	female	38	Gynecology	20220607	positive	1020438032
1000425052	female	35	Gynecology	20221108	positive	1022819428
1000426257	female	36	Gynecology	20220402	positive	1019588858
1000429110	female	30	Gynecology	20220628	positive	1020738511
1000432364	female	37	Gynecology	20220112	positive	1018598182
1000452754	female	54	Reproductive Gynecology	20220728	positive	1021209690
1000471583	female	56	Gynecology	20220712	positive	1020938057
1000534382	female	55	Gynecology	20220622	positive	1020652404
1000536674	female	41	Reproductive Gynecology	20221129	positive	1023180282
1000564739	female	32	Gynecology	20221012	positive	1022436663
1000586419	female	28	Gynecology	20220415	positive	1019741594
1000623165	female	25	Gynecology	20220826	positive	1021696827
1000623165	female	26	Gynecology	20221103	positive	1022749252
1000640116	female	44	Gynecology	20220609	positive	1020472231
1000658703	female	54	Gynecology	20220630	positive	1020767590
1000660478	female	33	Gynecology	20221025	positive	1022594826
1000661860	female	22	Gynecology	20220207	positive	1018846564
1000666217	female	30	Reproductive Gynecology	20220513	positive	1020111134
1000705347	female	27	Gynecology	20220425	positive	1019864508
1000710869	female	38	Reproductive Gynecology	20220302	positive	1019195972
1000715863	female	41	Gynecology	20220510	positive	1020052566
1000752380	female	48	Gynecology	20220720	positive	1021081796
1000807520	female	22	Gynecology	20220525	positive	1020273377
1000812293	female	40	Gynecology	20220216	positive	1018986305
1000848596	female	39	Gynecology	20220611	positive	1020504266
1000858894	female	24	Gynecology	20220118	positive	1018662956
1000859396	female	30	Gynecology	20220528	positive	1020317411
1000869361	female	48	Gynecology	20220527	positive	1020303097
1000927276	female	39	Gynecology	20220726	positive	1021165778
1000984963	female	30	Gynecology	20220519	positive	1020191893
1000990745	female	60	Gynecology	20220726	positive	1021166426
1001006140	female	30	Gynecology	20221020	positive	1022527544
1001019739	female	28	Gynecology	20221026	positive	1022612568
1001021424	female	33	Gynecology	20220628	positive	1020739557
1001029105	female	38	Gynecology	20220210	positive	1018912732
1001035669	female	33	Gynecology	20220316	positive	1019379015
1001036590	female	50	Gynecology	20220510	positive	1020052985
1001071835	female	42	Gynecology	20220809	positive	1021395482
1001083609	female	50	Gynecology	20220518	positive	1020172398
1001128846	female	43	Reproductive Gynecology	20220824	positive	1021652688
1001135822	female	58	Gynecology	20220528	positive	1020318536
1001141430	female	38	Gynecology	20220111	positive	1018582326
1001173649	female	46	Gynecology	20220112	positive	1018593831
1001208835	female	64	Gynecology	20220617	positive	1020581854
1001217527	female	24	Gynecology	20220823	positive	1021636275
1001229624	female	38	Gynecology	20220428	positive	1019912699
1001241622	female	49	Gynecology	20220915	positive	1021995758
1001258828	female	25	Gynecology	20220219	positive	1019043737
1001314060	female	44	Gynecology	20220422	positive	1019832442
1001321046	female	54	Gynecology	20220721	positive	1021100790
1001341788	female	38	Gynecology	20221119	positive	1023021116
1001349043	female	59	Gynecology	20220210	positive	1018901305
1001351069	female	27	Gynecology	20220428	positive	1019914821
1001377848	female	56	Gynecology	20220611	positive	1020494933
1001381304	female	51	Reproductive Gynecology	20220107	positive	1018538159
1001403065	female	32	Gynecology	20220127	positive	1018780973
1001403065	female	32	Gynecology	20220530	positive	1020327406
1001407713	female	50	Reproductive Gynecology	20220923	positive	1022140991
1001425781	female	36	Gynecology	20221124	positive	1023107917
1001532535	female	45	Gynecology	20220113	positive	1018607136
1001561753	female	27	Gynecology	20220604	positive	1020396691
1001562855	female	38	Gynecology	20220429	positive	1019928752
1001564310	female	37	Gynecology	20220130	positive	1018813120
1001573938	female	36	Reproductive Gynecology	20220308	positive	1019271656
1001575935	female	47	Gynecology	20220802	positive	1021285997
1001586924	female	50	Gynecology	20220317	positive	1019394785
1001586924	female	50	Gynecology	20220623	positive	1020665081
1001586924	female	50	Gynecology	20221013	positive	1022461311
1001589396	female	30	Gynecology	20220526	positive	1020283362
1001619275	female	23	Gynecology	20220412	positive	1019688638
1001623585	female	50	Gynecology	20220216	positive	1018986415
1001623585	female	51	Gynecology	20220630	positive	1020769995
1001623585	female	51	Gynecology	20220804	positive	1021323075
1001623585	female	51	Gynecology	20221209	positive	1023301043
1001645252	female	59	Gynecology	20220824	positive	1021647812
1001704626	female	28	Gynecology	20220421	positive	1019809583
1001704626	female	29	Gynecology	20220428	positive	1019911676
1001704626	female	29	Gynecology	20220730	positive	1021239405
1001720168	female	32	Gynecology	20220510	positive	1020064881
1001720431	female	40	Reproductive Gynecology	20220702	positive	1020805795
1001750276	female	31	Gynecology	20220302	positive	1019188420
1001770242	female	27	Gynecology	20220627	positive	1020716000
1001787638	female	27	Gynecology	20220531	positive	1020338003
1001812669	female	25	Gynecology	20220107	positive	1018543323
1001856138	female	32	Gynecology	20220621	positive	1020638954
1001871858	female	51	Gynecology	20220426	positive	1019883557
1001872529	female	34	Gynecology	20220425	positive	1019862283
1001887386	female	34	Gynecology	20221227	positive	1023427886
1001889203	female	36	Reproductive Gynecology	20220803	positive	1021304661
1001898731	female	48	Gynecology	20220920	positive	1022085230
1001915208	female	46	Gynecology	20220628	positive	1020739555
1001925136	female	25	Gynecology	20220518	positive	1020174026
1001926785	female	49	Reproductive Gynecology	20220303	positive	1019206123
1001946544	female	54	Gynecology	20220722	positive	1021109867
1001956015	female	34	Gynecology	20220106	positive	1018528028
1001988697	female	51	Gynecology	20220119	positive	1018683163
1002015985	female	50	Gynecology	20221025	positive	1022590404
1002032061	female	54	Gynecology	20220903	positive	1021815832
1002096311	female	45	Gynecology	20220208	positive	1018858310
1002125726	female	24	Gynecology	20220624	positive	1020683103
1002136827	female	23	Gynecology	20220720	positive	1021074313
1002148402	female	56	Gynecology	20220325	positive	1019489962
1002163874	female	43	Gynecology	20220413	positive	1019709765
1002179514	female	30	Reproductive Gynecology	20220813	positive	1021471731
1002180544	female	31	Gynecology	20220212	positive	1018940972
1002187212	female	41	Gynecology	20220125	positive	1018749454
1002191435	female	24	Gynecology	20221025	positive	1022595235
1002213410	female	32	Gynecology	20220614	positive	1020536969
1002234387	female	26	Gynecology	20220429	positive	1019923617
1002245549	female	60	Gynecology	20220527	positive	1020296965
1002245549	female	60	Gynecology	20221019	positive	1022506422
1002283876	female	49	Gynecology	20221025	positive	1022597960
1002287481	female	61	Gynecology	20220713	positive	1020967163
1002293161	female	26	Gynecology	20220614	positive	1020529148
1002306346	female	57	Gynecology	20220113	positive	1018608254
1002306346	female	58	Gynecology	20220517	positive	1020158792
1002307200	female	25	Gynecology	20220111	positive	1018582699
1002307200	female	25	Gynecology	20220511	positive	1020079129
1002307236	female	30	Gynecology	20220107	positive	1018543524
1002319527	female	58	Gynecology	20220322	positive	1019441364
1002353447	female	27	Gynecology	20221103	positive	1022747127
1002365613	female	26	Gynecology	20220502	positive	1019941576
1002368243	female	59	Gynecology	20220509	positive	1020040386
1002386383	female	78	Gynecology	20220526	positive	1020289058
1002391394	female	44	Gynecology	20220112	positive	1018589756
1002419492	female	29	Gynecology	20220114	positive	1018626545
1002425952	female	25	Gynecology	20221018	positive	1022491218
1002438466	female	26	Gynecology	20220228	positive	1019151665
1002479877	female	65	Gynecology	20220719	positive	1021061540
1002517686	female	26	Gynecology	20220811	positive	1021427839
1002547361	female	27	Gynecology	20220629	positive	1020759377
1002567659	female	33	Gynecology	20220909	positive	1021910560
1002569333	female	52	Gynecology	20221027	positive	1022626344
1002575352	female	27	Gynecology	20220623	positive	1020665092
1002578886	female	44	Gynecology	20220702	positive	1020806689
1002600876	female	31	Gynecology	20220604	positive	1020395919
1002605893	female	31	Gynecology	20220212	positive	1018944834
1002624411	female	45	Gynecology	20220519	positive	1020193279
1002636721	female	30	Gynecology	20220309	positive	1019290288
1002637867	female	26	Gynecology	20220818	positive	1021558087
1002645757	female	32	Reproductive Gynecology	20221024	positive	1022566123
1002649348	female	26	Gynecology	20221020	positive	1022528278
1002652417	female	18	Gynecology	20220208	positive	1018872172
1002666863	female	39	Gynecology	20220126	positive	1018768537
1002674135	female	24	Gynecology	20220117	positive	1018646955
1002716415	female	20	Gynecology	20220609	positive	1020471940
1002724174	female	23	Gynecology	20220422	positive	1019828109
1002732012	female	23	Gynecology	20220326	positive	1019499998
1002732012	female	24	Gynecology	20221005	positive	1022322653
1002745180	female	56	Gynecology	20220623	positive	1020673867
1002745376	female	32	Gynecology	20220610	positive	1020481664
1002745376	female	32	Gynecology	20221005	positive	1022314757
1002747267	female	20	Gynecology	20220531	positive	1020350100
1002759802	female	27	Gynecology	20220107	positive	1018543898
1002797044	female	33	Gynecology	20220803	positive	1021300770
1002800752	female	34	Gynecology	20220115	positive	1018639752
1002801392	female	23	Gynecology	20220115	positive	1018638023
1002802585	female	42	Gynecology	20220118	positive	1018667965
1002834634	female	47	Gynecology	20220211	positive	1018924891
1002835831	female	52	Gynecology	20220208	positive	1018863786
1002843834	female	29	Reproductive Gynecology	20220309	positive	1019291611
1002845325	female	26	Gynecology	20220211	positive	1018927920
1002845408	female	28	Gynecology	20220211	positive	1018927360
1002846566	female	34	Gynecology	20220214	positive	1018951444
1002851948	female	25	Gynecology	20220211	positive	1018924614
1002859539	female	43	Gynecology	20220216	positive	1018984238
1002859539	female	43	Gynecology	20220804	positive	1021319542
1002870749	female	27	Gynecology	20220218	positive	1019027660
1002875282	female	23	Gynecology	20220224	positive	1019106784
1002880576	female	56	Gynecology	20220223	positive	1019084786
1002892668	female	56	Gynecology	20220302	positive	1019195376
1002904163	female	27	Gynecology	20220322	positive	1019449723
1002904713	female	49	Gynecology	20221012	positive	1022427958
1002906779	female	52	Gynecology	20220514	positive	1020128305
1002906822	female	27	Gynecology	20220311	positive	1019315974
1002907268	female	36	Gynecology	20220304	positive	1019221161
1002907268	female	37	Gynecology	20220826	positive	1021687402
1002910340	female	26	Gynecology	20220305	positive	1019242540
1002914920	female	67	Gynecology	20220623	positive	1020674014
1002935940	female	35	Gynecology	20220319	positive	1019419090
1002938977	female	40	Reproductive Gynecology	20220409	positive	1019663894
1002944696	female	25	Gynecology	20220329	positive	1019533909
1002953586	female	28	Gynecology	20220401	positive	1019576484
1002954603	female	22	Gynecology	20220609	positive	1020469407
1002962889	female	45	Gynecology	20220414	positive	1019726463
1002963062	female	40	Gynecology	20220519	positive	1020191671
1002973443	female	23	Gynecology	20220414	positive	1019721828
1002983578	female	23	Gynecology	20220714	positive	1020985360
1002986807	female	27	Gynecology	20220421	positive	1019815823
1002990706	female	25	Gynecology	20220611	positive	1020502177
1002992095	female	67	Reproductive Gynecology	20220921	positive	1022101469
1002994890	female	27	Gynecology	20220601	positive	1020363269
1002997067	female	28	Gynecology	20220531	positive	1020348734
1003010098	female	28	Gynecology	20220521	positive	1020219559
1003017241	female	34	Gynecology	20220507	positive	1020019524
1003018518	female	46	Gynecology	20220511	positive	1020076743
1003033117	female	41	Gynecology	20221012	positive	1022427061
1003033764	female	32	Gynecology	20220519	positive	1020184425
1003037315	female	19	Gynecology	20220511	positive	1020082446
1003039016	female	58	Gynecology	20220512	positive	1020098961
1003043129	female	47	Gynecology	20220519	positive	1020191995
1003063758	female	19	Gynecology	20220531	positive	1020350659
1003068471	female	66	Gynecology	20220531	positive	1020338923
1003070182	female	57	Gynecology	20220607	positive	1020437126
1003074983	female	44	Gynecology	20220616	positive	1020572798
1003076947	female	37	Gynecology	20220608	positive	1020456486
1003077598	female	45	Gynecology	20220607	positive	1020426730
1003080391	female	46	Gynecology	20220629	positive	1020752234
1003082594	female	31	Gynecology	20220607	positive	1020436595
1003083577	female	41	Gynecology	20220824	positive	1021653192
1003087298	female	28	Gynecology	20220624	positive	1020690109
1003120063	female	49	Gynecology	20220624	positive	1020691576
1003120935	female	30	Gynecology	20220729	positive	1021226774
1003121592	female	48	Gynecology	20220624	positive	1020689816
1003131477	female	26	Gynecology	20220624	positive	1020691834
1003141773	男	28	Dermatology Department	20220630	positive	1020770519
1003151799	female	68	Reproductive Gynecology	20220707	positive	1020874123
1003160192	female	44	Gynecology	20220723	positive	1021136720
1003160625	female	34	Gynecology	20220713	positive	1020964406
1003165530	female	32	Gynecology	20220714	positive	1020981568
1003165866	female	28	Gynecology	20220712	positive	1020946960
1003176999	female	22	Gynecology	20220715	positive	1021005175
1003184778	female	25	Gynecology	20220721	positive	1021092590
1003192811	female	46	Gynecology	20220722	positive	1021109535
1003205868	female	39	Gynecology	20220721	positive	1021095949
1003211823	female	28	Gynecology	20220723	positive	1021137509
1003223056	female	25	Gynecology	20220804	positive	1021316773
1003314071	female	33	Gynecology	20220927	positive	1022192333
1003322520	female	22	Gynecology	20221028	positive	1022650155
1003334266	female	53	Gynecology	20220831	positive	1021767476
1003340542	female	46	Reproductive Gynecology	20220903	positive	1021810886
1003344536	female	31	Gynecology	20220914	positive	1021980789
1003349780	female	49	Gynecology	20220907	positive	1021871424
1003368205	female	36	Gynecology	20220915	positive	1021998351
1003369495	female	35	Gynecology	20220916	positive	1022018627
1003372788	female	38	Gynecology	20220917	positive	1022041607
1003372788	female	38	Gynecology	20221124	positive	1023110805
1003381047	female	26	Gynecology	20221213	positive	1023335625
1003429086	female	20	Gynecology	20221020	positive	1022528903
1003438535	female	26	Reproductive Gynecology	20221026	positive	1022609363
1003439532	female	33	Gynecology	20221025	positive	1022594951
1003467562	female	27	Gynecology	20221109	positive	1022838856
1003482994	female	53	Gynecology	20221117	positive	1022981207
1003489325	female	42	Gynecology	20221123	positive	1023089619
1003501988	female	23	Gynecology	20221202	positive	1023225198
1003506984	female	76	Gynecology	20221206	positive	1023261483
5010283075	female	31	Gynecology	20220324	positive	1019481577
5300-0000183690	female	47	Reproductive Gynecology	20220318	positive	1019403975
5300-0000804014	female	34	Gynecology	20220512	positive	1020099256
5306-0622014953	female	36	Gynecology	20220212	positive	1018938716
5306-0627012002	female	71	Reproductive Gynecology	20220608	positive	1020447668
533102-DH3124008246	female	38	Gynecology	20220218	positive	1019029768
0101002722	female	52	Gynecology	20210917	positive	1017269221
0101320128	female	31	Gynecology	20211014	positive	1017551170
0101329901	female	29	Gynecology	20210605	positive	1016021506
0102259064	female	65	Gynecology	20210325	positive	1015198528
0102543723	female	33	Gynecology	20210610	positive	1016075150
0102685422	female	26	Gynecology	20211125	positive	1018042805
0103051853	female	54	Gynecology	20211110	positive	1017872739
0103254554	female	35	Gynecology	20210813	positive	1016847338
0103352155	female	29	Gynecology	20210319	positive	1015125625
0103368401	female	36	Reproductive Gynecology	20210116	positive	1014474389
0111168372	female	62	Reproductive Gynecology	20210106	positive	1014363056
0111171246	female	36	Gynecology	20211104	positive	1017803386
0111231570	female	35	Gynecology	20210120	positive	1014508057
0112138788	female	56	Gynecology	20210929	positive	1017392837
0122008838	female	52	Gynecology	20210604	positive	1016011044
0122008838	female	52	Gynecology	20211015	positive	1017562045
1000021430	female	24	Gynecology	20210828	positive	1017029245
1000035951	female	35	Gynecology	20210313	positive	1015055145
1000061867	female	37	Gynecology	20210929	positive	1017394773
1000072089	female	54	Gynecology	20210312	positive	1015045494
1000072089	female	54	Gynecology	20210902	positive	1017088240
1000076877	female	50	Gynecology	20210903	positive	1017100369
1000083720	female	37	Reproductive Gynecology	20210427	positive	1015582711
1000083720	female	38	Reproductive Gynecology	20211211	positive	1018225078
1000101213	female	32	Gynecology	20210324	positive	1015181925
1000144536	female	57		20210708	positive	7100810250
1000181786	female	38	Gynecology	20210513	positive	1015747450
1000197051	female	53	Gynecology	20210222	positive	1014805026
1000199224	female	33	Gynecology	20210621	positive	1016180472
1000204970	female	38	Gynecology	20211019	positive	1017602734
1000205435	female	30	Gynecology	20210218	positive	1014753514
1000238622	female	37	Reproductive Gynecology	20211030	positive	1017739023
1000242740	female	33	Gynecology	20210204	positive	1014667992
1000242740	female	33	Gynecology	20210624	positive	1016221257
1000242740	female	33	Gynecology	20211103	positive	1017778646
1000242740	female	33	Reproductive Gynecology	20210804	positive	1016726117
1000275590	female	30	Gynecology	20211215	positive	1018271692
1000280769	female	34	Gynecology	20211102	positive	1017771388
1000283792	female	23	Gynecology	20210401	positive	1015278995
1000283792	female	23	Gynecology	20210527	positive	1015910259
1000288681	female	32	Gynecology	20210120	positive	1014510720
1000307923	female	23	Gynecology	20211215	positive	1018272417
1000342094	female	34	Gynecology	20211104	positive	1017794681
1000373474	female	56	Reproductive Gynecology	20210703	positive	1016335960
1000397025	female	56	Gynecology	20210309	positive	1014994480
1000411297	female	48	Gynecology	20210429	positive	1015605497
1000434781	female	45	Gynecology	20211214	positive	1018257209
1000509854	female	31	Gynecology	20211214	positive	1018256716
1000520976	female	47	Gynecology	20210827	positive	1017016126
1000587218	female	37	Gynecology	20210706	positive	1016358429
1000632010	female	25	Gynecology	20210219	positive	1014769408
1000633299	female	47	Gynecology	20210521	positive	1015844899
1000635873	female	60	Gynecology	20210706	positive	1016352685
1000695027	female	27	Reproductive Gynecology	20211116	positive	1017939543
1000710390	female	31	Gynecology	20210724	positive	1016601637
1000749280	female	41	Reproductive Gynecology	20210902	positive	1017086386
1000765478	female	33	Gynecology	20210409	positive	1015372095
1000766272	female	39	Gynecology	20211130	positive	1018096303
1000771862	female	31	Reproductive Gynecology	20210422	positive	1015524097
1000790593	female	56	Gynecology	20210421	positive	1015503536
1000810272	female	28	Gynecology	20210202	positive	1014645960
1000832740	female	26	Gynecology	20210729	positive	1016661981
1000848596	female	38	Gynecology	20210722	positive	1016567544
1000848596	female	39	Gynecology	20211217	positive	1018292835
1000857346	female	50	Gynecology	20211118	positive	1017964683
1000863307	female	23	Gynecology	20211124	positive	1018025092
1000906059	female	57	Gynecology	20210716	positive	1016495958
1000909707	female	52	Gynecology	20210914	positive	1017226953
1000922523	female	53	Gynecology	20210317	positive	1015099971
1000928489	female	57	Gynecology	20211112	positive	1017899082
1000934129	female	50	Gynecology	20211119	positive	1017974958
1000970844	female	33	Gynecology	20211125	positive	1018046102
1000984963	female	30	Gynecology	20210720	positive	1016537316
1000999767	female	25	Gynecology	20210424	positive	1015548860
1001015073	female	40	Gynecology	20210714	positive	1016463831
1001020070	female	24	Gynecology	20211123	positive	1018019845
1001021643	female	34	Gynecology	20210811	positive	1016813509
1001052197	female	42	Gynecology	20210323	positive	1015165924
1001087865	female	31	Gynecology	20211112	positive	1017897197
1001105425	female	31	Gynecology	20211116	positive	1017931660
1001108745	female	43	Gynecology	20210803	positive	1016711500
1001118099	female	38	Gynecology	20211112	positive	1017899253
1001127710	female	43	Gynecology	20211015	positive	1017564029
1001128846	female	42	Reproductive Gynecology	20211027	positive	1017702754
1001147464	female	38	Reproductive Gynecology	20210324	positive	1015182884
1001180501	female	51	Gynecology	20211013	positive	1017534516
1001199354	female	27	Reproductive Gynecology	20210309	positive	1014996509
1001212858	female	38	Gynecology	20210519	positive	1015821977
1001274603	female	46	Gynecology	20210203	positive	1014661011
1001275119	female	29	Gynecology	20211110	positive	1017867737
1001302365	female	45	Gynecology	20210720	positive	1016537099
1001303697	female	34	Gynecology	20211117	positive	1017950901
1001321046	female	53	Gynecology	20210705	positive	1016343611
1001324270	female	40	Gynecology	20210623	positive	1016212188
1001324270	female	40	Gynecology	20211217	positive	1018295673
1001330331	female	51	Gynecology	20210525	positive	1015885904
1001334456	female	26	Gynecology	20210326	positive	1015211095
1001368079	female	40	Gynecology	20211105	positive	1017808577
1001371718	female	57	Reproductive Gynecology	20211216	positive	1018284048
1001375560	female	46	Gynecology	20210610	positive	1016076442
1001375560	female	50	Gynecology	20211015	positive	1017560027
1001406568	female	34	Gynecology	20211211	positive	1018227532
1001451443	female	37	Gynecology	20210630	positive	1016296312
1001457463	female	26	Gynecology	20210721	positive	1016552419
1001464679	female	49	Gynecology	20210416	positive	1015457247
1001481225	female	58	Gynecology	20210511	positive	1015724189
1001501244	female	58	Gynecology	20210908	positive	1017157003
1001509406	female	53	Gynecology	20211231	positive	1018481992
1001518613	female	57	Gynecology	20211130	positive	1018088765
1001532527	female	31	Gynecology	20210908	positive	1017161026
1001533057	female	27	Gynecology	20210630	positive	1016294081
1001551541	female	29	Gynecology	20210310	positive	1015016381
1001558159	female	37	Gynecology	20210430	positive	1015622240
1001562855	female	37	Gynecology	20210902	positive	1017085458
1001574656	female	30	Reproductive Gynecology	20210908	positive	1017158078
1001575809	female	34	Gynecology	20210222	positive	1014804082
1001586924	female	49	Gynecology	20211211	positive	1018226867
1001596211	female	52	Gynecology	20211216	positive	1018283986
1001603714	female	35	Gynecology	20210225	positive	1014859404
1001603714	female	36	Gynecology	20210624	positive	1016226839
1001606412	female	57	Gynecology	20210901	positive	1017068364
1001630416	female	28	Gynecology	20210317	positive	1015093927
1001636759	female	34	Reproductive Gynecology	20211117	positive	1017951479
1001640467	female	55	Gynecology	20210325	positive	1015198605
1001677873	female	46	Gynecology	20210703	positive	1016337103
1001677873	female	47	Gynecology	20211204	positive	1018147217
1001688578	female	57	Gynecology	20210121	positive	1014525187
1001704910	female	48	Gynecology	20211208	positive	1018189631
1001716055	female	33	Reproductive Gynecology	20210803	positive	1016715281
1001720814	female	45	Gynecology	20210421	positive	1015507997
1001741133	female	36	Gynecology	20210727	positive	1016624356
1001764754	female	27	Gynecology	20210803	positive	1016713059
1001765892	female	38	Gynecology	20210408	positive	1015353864
1001839371	female	39	Gynecology	20210302	positive	1014902383
1001839371	female	40	Gynecology	20210716	positive	1016489518
1001873092	female	25	Gynecology	20210501	positive	1015630351
1001878001	female	56	Gynecology	20210617	positive	1016143632
1001891652	female	50	Gynecology	20210121	positive	1014518611
1001913713	female	40	Gynecology	20210414	positive	1015420587
1001921764	female	46	Gynecology	20210406	positive	1015327165
1001931570	female	31	Gynecology	20211211	positive	1018229887
1001950067	female	61	Reproductive Gynecology	20211221	positive	1018341103
1001953121	female	57	Gynecology	20210222	positive	1014806914
1001953121	female	58	Gynecology	20210610	positive	1016070492
1001958066	female	35	Reproductive Gynecology	20210701	positive	1016308734
1001963855	female	30	Gynecology	20210122	positive	1014536335
1001963855	female	30	Gynecology	20210416	positive	1015451367
1001984795	female	42	Gynecology	20211013	positive	1017527733
1001988697	female	50	Gynecology	20210709	positive	1016400969
1001993141	female	35	Gynecology	20211022	positive	1017645908
1001997292	female	27	Gynecology	20210322	positive	1015150810
1002017493	female	42	Gynecology	20210930	positive	1017412566
1002019093	female	33	Gynecology	20211208	positive	1018190016
1002074269	female	40	Gynecology	20210929	positive	1017393017
1002082011	female	25	Gynecology	20210703	positive	1016335753
1002094096	female	33	Gynecology	20210302	positive	1014906401
1002134142	female	23	Gynecology	20210615	positive	1016107107
1002139746	female	26	Gynecology	20211001	positive	1017418031
1002148402	female	55	Gynecology	20210107	positive	1014378468
1002148402	female	56	Gynecology	20210610	positive	1016070223
1002148402	female	56	Gynecology	20210930	positive	1017405081
1002150751	female	28	Gynecology	20210111	positive	1014411179
1002150751	female	29	Gynecology	20210715	positive	1016476891
1002155866	female	19	Gynecology	20210319	positive	1015131476
1002156832	female	23	Gynecology	20210826	positive	1016995110
1002157545	female	32	Gynecology	20210115	positive	1014456446
1002157844	female	50	Gynecology	20210114	positive	1014450690
1002167170	female	24	Gynecology	20210603	positive	1015997253
1002168221	female	43	Gynecology	20210121	positive	1014524350
1002170543	female	23	Gynecology	20210610	positive	1016075653
1002192340	female	38	Gynecology	20210205	positive	1014680638
1002192340	female	39	Gynecology	20210605	positive	1016016058
1002192949	female	43	Gynecology	20210210	positive	1014726514
1002198645	female	31	Gynecology	20210209	positive	1014720594
1002209185	female	33	Gynecology	20210219	positive	1014779181
1002213162	female	63	Gynecology	20210222	positive	1014808533
1002213444	female	56	Gynecology	20210610	positive	1016074792
1002214140	female	34	Gynecology	20210222	positive	1014809939
1002214276	female	30	Gynecology	20210223	positive	1014825132
1002215288	female	35	Gynecology	20210225	positive	1014858964
1002215939	female	30	Gynecology	20210227	positive	1014886872
1002218143	female	37	Gynecology	20210225	positive	1014861159
1002233044	female	28	Gynecology	20210303	positive	1014929984
1002233891	female	32	Reproductive Gynecology	20210304	positive	1014945497
1002238085	female	50	Gynecology	20210310	positive	1015012375
1002241368	female	45	Gynecology	20210310	positive	1015017411
1002247210	female	28	Reproductive Gynecology	20210311	positive	1015031870
1002256053	female	21	Gynecology	20210316	positive	1015084303
1002260166	female	55	Gynecology	20210318	positive	1015115908
1002260344	female	55	Gynecology	20210318	positive	1015115910
1002268764	female	23	Gynecology	20210326	positive	1015215993
1002272420	female	16	Gynecology	20210329	positive	1015235468
1002273354	female	35	Reproductive Gynecology	20210326	positive	1015212687
1002281742	female	46	Gynecology	20210401	positive	1015276001
1002287852	female	33	Reproductive Gynecology	20211221	positive	1018335325
1002300180	female	41	Gynecology	20210414	positive	1015429653
1002302695	female	35	Gynecology	20210414	positive	1015423162
1002302695	female	35	Gynecology	20211012	positive	1017520430
1002308515	female	43	Gynecology	20210417	positive	1015468312
1002314726	female	39	Gynecology	20210428	positive	1015598285
1002319527	female	57	Gynecology	20210612	positive	1016096203
1002319527	female	57	Gynecology	20210914	positive	1017221539
1002323602	female	18	Gynecology	20210428	positive	1015597089
1002324360	female	32	Reproductive Gynecology	20210522	positive	1015854672
1002340836	female	29	Reproductive Gynecology	20210508	positive	1015688852
1002360290	female	34	Gynecology	20210520	positive	1015834310
1002374017	female	33	Gynecology	20211214	positive	1018256568
1002374198	female	25	Gynecology	20210529	positive	1015941669
1002382930	female	44	Gynecology	20210604	positive	1016007099
1002383142	female	49	Gynecology	20210605	positive	1016018962
1002383640	female	55	Medical Oncology Department	20210603	positive	1016010783
1002388995	female	29	Gynecology	20210608	positive	1016046477
1002391394	female	44	Gynecology	20210629	positive	1016282072
1002397851	female	42	Gynecology	20210922	positive	1017300813
1002401593	female	22	Gynecology	20210617	positive	1016137131
1002404398	female	52	Gynecology	20210618	positive	1016159721
1002408812	female	44	Gynecology	20210623	positive	1016216089
1002410598	female	23	Gynecology	20210625	positive	1016239322
1002414151	female	27	Gynecology	20210625	positive	1016239187
1002415524	female	50	Gynecology	20210629	positive	1016280785
1002416071	female	29	Gynecology	20211217	positive	1018297205
1002417076	female	25	Gynecology	20210626	positive	1016255822
1002420397	female	48	Gynecology	20210629	positive	1016272989
1002433341	female	19	Gynecology	20210706	positive	1016362794
1002435367	female	48	Gynecology	20210707	positive	1016377364
1002441098	female	34	Gynecology	20211018	positive	1017583947
1002456290	female	32	Gynecology	20210719	positive	1016518999
1002481122	female	50	Gynecology	20210728	positive	1016643440
1002485794	female	31	Gynecology	20210811	positive	1016817661
1002485978	female	33	Gynecology	20210819	positive	1016918490
1002493649	female	56	Gynecology	20210807	positive	1016773961
1002514153	female	23	Reproductive Gynecology	20211013	positive	1017533644
1002514344	female	38	Gynecology	20210814	positive	1016858366
1002517686	female	25	Gynecology	20210907	positive	1017139210
1002518328	female	43	Gynecology	20210814	positive	1016859017
1002531736	female	43	Gynecology	20210821	positive	1016946759
1002540037	female	37	Gynecology	20210826	positive	1016997109
1002541040	female	33	Gynecology	20210828	positive	1017027076
1002557734	female	25	Gynecology	20210903	positive	1017098067
1002569333	female	51	Gynecology	20211222	positive	1018350741
1002572088	female	38	Gynecology	20211209	positive	1018195347
1002572884	female	36	Gynecology	20210915	positive	1017243027
1002579294	female	29	Gynecology	20210914	positive	1017227579
1002581991	female	44	Gynecology	20210916	positive	1017253056
1002586609	female	54	Reproductive Gynecology	20211009	positive	1017477574
1002595529	female	32	Gynecology	20211023	positive	1017654157
1002608843	female	38	Gynecology	20211104	positive	1017801893
1002610160	female	49	Gynecology	20211010	positive	1017498714
1002611549	female	26	Gynecology	20211117	positive	1017945691
1002615766	female	21	Gynecology	20211019	positive	1017603559
1002632484	female	24	Reproductive Gynecology	20211016	positive	1017570779
1002637605	female	57	Gynecology	20211019	positive	1017602646
1002649331	female	26	Gynecology	20211026	positive	1017685154
1002653016	female	31	Gynecology	20211126	positive	1018059464
1002663739	female	60	Gynecology	20211222	positive	1018353380
1002668078	female	45	Reproductive Gynecology	20211104	positive	1017802421
1002677331	female	39	Gynecology	20211111	positive	1017885741
1002678666	female	43	Gynecology	20211116	positive	1017933897
1002681920	female	48	Gynecology	20211111	positive	1017886398
1002682288	female	35	Gynecology	20211112	positive	1017900443
1002688028	female	31	Gynecology	20211119	positive	1017976878
1002695774	female	29	Gynecology	20211123	positive	1018013473
1002696702	female	24	Gynecology	20211203	positive	1018133253
1002707396	female	58	Gynecology	20211215	positive	1018271625
1002714925	female	25	Gynecology	20211130	positive	1018091822
1002717811	female	25	Gynecology	20211201	positive	1018110328
1002739614	female	31	Gynecology	20211214	positive	1018255801
1002754114	female	43	Gynecology	20211221	positive	1018334206
1002762364	female	38	Gynecology	20211225	positive	1018394759
5010115520	female	29	Gynecology	20210210	positive	1014728266
5010737837	female	32	Gynecology	20211016	positive	1017574601
5010765339	female	28	Gynecology	20210203	positive	1014661058
5012373208	female	32	Gynecology	20210312	positive	1015043385
5300-0000183690	female	46	Reproductive Gynecology	20210317	positive	1015092959
5300-0000799439	female	31	Gynecology	20210707	positive	1016372934
5304-0423052840	female	29	Gynecology	20210624	positive	1016228978
5323-2300313711	female	33	Reproductive Gynecology	20210714	positive	1016465767
5327-2700010599	female	46	Gynecology	20211126	positive	1018053702
5335-3528000467	female	46	Gynecology	20210720	positive	1016538874
0101324195	female	28	Gynecology	20201013	positive	1013484950
0102297209	female	39	Reproductive Gynecology	20200324	positive	1011506283
0102336117	female	38	Gynecology	20200327	positive	1011539996
0102498076	female	32	Gynecology	20200416	positive	1011706354
0103283709	female	34	Gynecology	20200924	positive	1013338595
0103314069	female	31	Gynecology	20201027	positive	1013633505
0103378685	female	30	Gynecology	20200821	positive	1013000010
0111193462	female	32	Gynecology	20201117	positive	1013843860
0111214853	female	28	Gynecology	20200813	positive	1012905255
0112312006	female	37	Gynecology	20201030	positive	1013672186
1000036364	female	37	Reproductive Gynecology	20200929	positive	1013380424
1000072089	female	53	Gynecology	20200306	positive	1011374143
1000072089	female	53	Gynecology	20200826	positive	1013048657
1000083720	female	36	Reproductive Gynecology	20200416	positive	1011705453
1000083720	female	36	Reproductive Gynecology	20201015	positive	1013512203
1000107736	female	27	Gynecology	20200725	positive	1012719707
1000160345	female	36	Gynecology	20200610	positive	1012203767
1000199224	female	32	Gynecology	20200622	positive	1012313054
1000199224	female	32	Gynecology	20201214	positive	1014131590
1000200438	female	57	Gynecology	20200818	positive	1012957476
1000200438	female	57	Gynecology	20201110	positive	1013779594
1000205435	female	29	Gynecology	20200111	positive	1011102556
1000258345	female	43	Gynecology	20200811	positive	1012873776
1000263166	female	33	Gynecology	20201031	positive	1013682016
1000301820	female	27	Gynecology	20201114	positive	1013827197
1000320032	female	52	Gynecology	20200701	positive	1012490791
1000340627	female	49	Gynecology	20201020	positive	1013559182
1000353015	female	34	Gynecology	20200714	positive	1012600182
1000357209	female	23	Gynecology	20200526	positive	1012063634
1000373503	female	28	Gynecology	20200801	positive	1012785456
1000406188	female	29	Gynecology	20201020	positive	1013560391
1000418527	female	48	Gynecology	20201014	positive	1013496883
1000440157	female	38	Gynecology	20200805	positive	1012817737
1000508091	female	27	Gynecology	20200226	positive	1011318829
1000509470	female	31	Gynecology	20200520	positive	1012008612
1000529925	female	38	Gynecology	20201222	positive	1014215302
1000537684	female	34	Gynecology	20201212	positive	1014126022
1000577832	female	18	Gynecology	20200312	positive	1011417993
1000669272	female	24	Reproductive Gynecology	20200507	positive	1011881526
1000670457	female	27	Gynecology	20200902	positive	1013118058
1000721231	female	36	Gynecology	20200917	positive	1013267654
1000758580	female	32	Gynecology	20200916	positive	1013252807
1000771862	female	30	Reproductive Gynecology	20200811	positive	1012881788
1000786542	female	31	Gynecology	20201106	positive	1013746190
1000811591	female	33	Gynecology	20201225	positive	1014259860
1000813029	female	37	Gynecology	20201128	positive	1013979112
1000818184	female	50	Gynecology	20200624	positive	1012337889
1000819499	female	47	Gynecology	20200717	positive	1012640372
1000839103	female	48	Gynecology	20201119	positive	1013875276
1000859396	female	29	Gynecology	20201016	positive	1013521755
1000922523	female	52	Gynecology	20200617	positive	1012267741
1000923271	female	27	Gynecology	20201027	positive	1013625268
1000943533	female	26	Gynecology	20200911	positive	1013211758
1000963008	female	37	Gynecology	20200915	positive	1013236708
1001017864	female	40	Gynecology	20200818	positive	1012956871
1001076425	female	43	Gynecology	20200528	positive	1012086987
1001090356	female	25	Gynecology	20200318	positive	1011460845
1001096492	female	31	Gynecology	20200310	positive	1011396910
1001101259	female	42	Gynecology	20200829	positive	1013084982
1001128846	female	41	Reproductive Gynecology	20200819	positive	1012971071
1001134991	female	41	Gynecology	20200522	positive	1012032743
1001136614	female	44	Gynecology	20200604	positive	1012152375
1001147464	female	37	Reproductive Gynecology	20200918	positive	1013275396
1001151179	female	32	Gynecology	20200714	positive	1012607105
1001178118	female	31	Gynecology	20200616	positive	1012258244
1001184877	female	42	Gynecology	20200718	positive	1012652424
1001213511	female	31	Gynecology	20201211	positive	1014114639
1001214660	female	47	Gynecology	20200429	positive	1011825383
1001233985	female	28	Gynecology	20200911	positive	1013214988
1001294723	female	26	Gynecology	20200326	positive	1011530084
1001340103	female	32	Gynecology	20191218	positive	1010893468
1001362437	female	38	Gynecology	20200108	positive	1011069940
1001378811	female	37	Gynecology	20200610	positive	1012208353
1001400138	female	52	Gynecology	20200825	positive	1013035975
1001422551	female	31	Gynecology	20201127	positive	1013965456
1001437087	female	31	Gynecology	20200903	positive	1013131481
1001449661	female	39	Gynecology	20201127	positive	1013965699
1001456730	female	34	Gynecology	20201215	positive	1014147451
1001457463	female	26	Gynecology	20201217	positive	1014172810
1001464679	female	48	Gynecology	20201128	positive	1013978433
1001471920	female	29	Gynecology	20191206	positive	1010797028
1001479355	female	22	Gynecology	20201223	positive	1014237159
1001481225	female	58	Gynecology	20200828	positive	1013072590
1001481225	female	58	Gynecology	20201010	positive	1013441222
1001485644	female	22	Gynecology	20200110	positive	1011094918
1001493619	female	49	Reproductive Gynecology	20200819	positive	1012971512
1001518089	female	52	Gynecology	20200912	positive	1013219280
1001543367	female	51	Reproductive Gynecology	20201022	positive	1013582833
1001554675	female	27	Gynecology	20200408	positive	1011631038
1001562855	female	36	Gynecology	20191219	positive	1010908233
1001562855	female	36	Gynecology	20200902	positive	1013120265
1001565143	female	57	Reproductive Gynecology	20191017	positive	1010368546
1001571486	female	25	Gynecology	20201013	positive	1013484307
1001584815	female	50	Gynecology	20200421	positive	1011752517
1001585838	female	38	Gynecology	20201022	positive	1013585611
1001610884	female	43	Reproductive Gynecology	20201210	positive	1014099420
1001614638	female	29	Gynecology	20201103	positive	1013706120
1001633507	female	54	Gynecology	20191212	positive	1010848336
1001640467	female	55	Gynecology	20200713	positive	1012590200
1001647985	female	28	Gynecology	20200917	positive	1013261978
1001651441	female	24	Gynecology	20200612	positive	1012230820
1001653559	female	34	Gynecology	20191227	positive	1010979596
1001653761	female	25	Gynecology	20191224	positive	1010947350
1001671020	female	46	Gynecology	20200516	positive	1011973994
1001671020	female	46	Gynecology	20200904	positive	1013143213
1001677873	female	45	Gynecology	20200114	positive	1011122837
1001687794	female	35	Gynecology	20200120	positive	1011183471
1001688578	female	56	Gynecology	20200811	positive	1012876933
1001689977	female	30	Gynecology	20200122	positive	1011197841
1001697756	female	47	Gynecology	20201107	positive	1013753773
1001699196	female	31	Gynecology	20200220	positive	1011297476
1001701908	female	32	Gynecology	20201106	positive	1013741327
1001704626	female	27	Gynecology	20200630	positive	1012476045
1001714854	female	73	Gynecology	20200314	positive	1011430614
1001722087	female	35	Gynecology	20200717	positive	1012640179
1001722248	female	33	Reproductive Gynecology	20200414	positive	1011682750
1001722907	female	47	Gynecology	20200319	positive	1011472706
1001733007	female	40	Gynecology	20200714	positive	1012606891
1001734307	female	19	Gynecology	20200403	positive	1011595209
1001737651	female	30	Gynecology	20200403	positive	1011598993
1001741133	female	36	Gynecology	20201215	positive	1014141910
1001745956	female	33	Gynecology	20200410	positive	1011656553
1001750276	female	30	Gynecology	20201125	positive	1013941565
1001757423	female	23	Gynecology	20200526	positive	1012064062
1001762775	female	51	Gynecology	20200422	positive	1011764463
1001763049	female	51	Gynecology	20200425	positive	1011796823
1001764630	female	35	Gynecology	20200424	positive	1011784782
1001765892	female	37	Gynecology	20201012	positive	1013460699
1001765892	female	37	Gynecology	20201217	positive	1014170501
1001771176	female	36	Gynecology	20200522	positive	1012033161
1001771863	female	22	Gynecology	20200429	positive	1011829813
1001778634	female	26	Reproductive Gynecology	20200521	positive	1012016795
1001780486	female	42	Gynecology	20200507	positive	1011885214
1001783457	female	20	Reproductive Gynecology	20200530	positive	1012108025
1001787638	female	25	Gynecology	20200922	positive	1013305002
1001799918	female	22	Gynecology	20201111	positive	1013792143
1001802878	female	44	Gynecology	20200522	positive	1012033317
1001816177	female	32	Reproductive Gynecology	20200602	positive	1012127966
1001825284	female	24	Gynecology	20201020	positive	1013553718
1001827674	female	45	Gynecology	20200609	positive	1012195659
1001835138	female	52	Gynecology	20200616	positive	1012252795
1001838140	female	50	Gynecology	20200619	positive	1012296322
1001839206	female	29	Reproductive Gynecology	20200618	positive	1012285263
1001849400	female	38	Gynecology	20201210	positive	1014102364
1001852534	female	44	Gynecology	20200629	positive	1012368770
1001854752	female	35	Gynecology	20200701	positive	1012493329
1001858204	female	24	Gynecology	20200702	positive	1012504441
1001858204	female	25	Gynecology	20201119	positive	1013874273
1001875934	female	62	Gynecology	20200805	positive	1012818010
1001878001	female	56	Gynecology	20201211	positive	1014115199
1001884550	female	41	Reproductive Gynecology	20200723	positive	1012695930
1001885734	female	38	Gynecology	20200815	positive	1012935272
1001889152	female	25	Gynecology	20200814	positive	1012922049
1001890064	female	30	Gynecology	20200731	positive	1012771495
1001891652	female	50	Gynecology	20200730	positive	1012765184
1001895265	female	30	Gynecology	20200728	positive	1012735261
1001902014	female	27	Gynecology	20201126	positive	1013954704
1001916612	female	39	Gynecology	20200814	positive	1012924391
1001927344	female	47	Gynecology	20200814	positive	1012925064
1001929346	female	53	Gynecology	20200815	positive	1012935161
1001940581	female	37	Gynecology	20200820	positive	1012985235
1001944487	female	34	Gynecology	20200821	positive	1012999178
1001965512	female	22	Gynecology	20200903	positive	1013131307
1001972448	female	52	Reproductive Gynecology	20200915	positive	1013241498
1001977472	female	23	Gynecology	20200910	positive	1013202826
1001987935	female	47	Gynecology	20200922	positive	1013307660
1001988296	female	21	Gynecology	20201014	positive	1013500316
1001997451	female	29	Reproductive Gynecology	20200924	positive	1013338239
1001998467	female	55	Gynecology	20200925	positive	1013345488
1002001438	female	43	Gynecology	20201010	positive	1013441313
1002019448	female	45	Gynecology	20201013	positive	1013474437
1002033079	female	23	Gynecology	20201021	positive	1013569832
1002039148	female	51	Gynecology	20201027	positive	1013628545
1002059894	female	46	Gynecology	20201126	positive	1013954681
1002064919	female	26	Gynecology	20201110	positive	1013778616
1002072418	female	53	Gynecology	20201117	positive	1013844230
1002078275	female	37	Gynecology	20201119	positive	1013880836
1002084885	female	22	Gynecology	20201124	positive	1013927572
1002087554	female	47	Reproductive Gynecology	20201125	positive	1013938990
1002089559	female	23	Reproductive Gynecology	20201126	positive	1013954897
1002095797	female	23	Gynecology	20201204	positive	1014039218
1002098761	female	49	Gynecology	20201204	positive	1014038596
1002104191	female	16	Gynecology	20201205	positive	1014052751
1002104602	female	41	Gynecology	20201208	positive	1014067830
1002109189	female	44	Gynecology	20201211	positive	1014115216
1002130802	female	58	Gynecology	20201224	positive	1014248868
5011737656	female	23	Gynecology	20200806	positive	1012831887
5300-5001389545	female	20	Reproductive Gynecology	20191010	positive	1010303128
5303-0381017845	female	45	Gynecology	20200819	positive	1012973279
5306-0627012002	female	69	Reproductive Gynecology	20200429	positive	1011830177
5323-2327008467	female	48	Gynecology	20200330	positive	1011553247
5325-2531010394	female	33	Reproductive Gynecology	20200416	positive	1011708213
5326-2626008897	female	58	Gynecology	20200417	positive	1011721122
5326-2627022131	female	29	Gynecology	20200724	positive	1012709009
5327-2700010599	female	45	Gynecology	20201112	positive	1013806269
5328-2800089203	female	34	Reproductive Gynecology	20201201	positive	1014002241

## Sheet: HPV42+
Patient ID	Patient Gender	Patient Age	Department	Test Date	Result	Barcode
0102057171	female	54	Gynecology	20240511	positive	1029525893
0127079110	female	45	Reproductive Gynecology	20240522	positive	1029671053
1000132024	female	57	Reproductive Gynecology	20240724	positive	1030568953
1000151775	female	48	Gynecology	20240202	positive	1028267253
1000358702	female	29	Gynecology	20240410	positive	1029105108
1000523213	female	26	Gynecology	20240423	positive	1029283349
1000539196	female	24	Gynecology	20240531	positive	1029800834
1000640216	female	41	Reproductive Gynecology	20240710	positive	1030352982
1000701319	female	51	Gynecology	20240727	positive	1030621174
1001166831	female	40	Gynecology	20240425	positive	1029322195
1001217527	female	26	Gynecology	20240424	positive	1029305562
1001411298	female	34	Gynecology	20240412	positive	1029137715
1001449459	female	32	Reproductive Gynecology	20240523	positive	1029691220
1001540860	female	49	Gynecology	20240613	positive	1029971860
1001599356	female	32	Gynecology	20240127	positive	1028192498
1001611576	female	32	Gynecology	20240403	positive	1029018765
1001617249	female	30	Gynecology	20240714	positive	1030410484
1001662146	female	52	Reproductive Gynecology	20240201	positive	1028253490
1001687766	female	29	Gynecology	20240206	positive	1028306641
1001689804	female	48	Gynecology	20240207	positive	1028316755
1001735153	female	76	Gynecology	20240418	positive	1029222466
1001760978	female	56	Gynecology	20240604	positive	1029845601
1001873663	female	40	Gynecology	20240605	positive	1029869446
1001906448	female	35	Gynecology	20240312	positive	1028719237
1001934205	female	29	Reproductive Gynecology	20240313	positive	1028731193
1001953369	female	58	Gynecology	20240510	positive	1029511246
1002089339	female	38	Gynecology	20240502	positive	1029405493
1002145241	female	31	Gynecology	20240424	positive	1029307474
1002198934	female	28	Reproductive Gynecology	20240325	positive	1028890971
1002531693	female	50	Gynecology	20240530	positive	1029782691
1002691190	female	31	Reproductive Gynecology	20240620	positive	1030071167
1002703055	female	51	Reproductive Gynecology	20240725	positive	1030588762
1002776062	female	34	Gynecology	20240515	positive	1029572699
1003112755	female	33	Gynecology	20240724	positive	1030558924
1003122792	female	48	Gynecology	20240111	positive	1027978361
1003122792	female	48	Gynecology	20240620	positive	1030068205
1003185165	female	43	Reproductive Gynecology	20240111	positive	1027977074
1003382179	female	28	Reproductive Gynecology	20240424	positive	1029306758
1003415188	female	29	Gynecology	20240522	positive	1029671881
1003427221	female	61	Gynecology	20240712	positive	1030380229
1003521395	female	23	Gynecology	20240327	positive	1028931342
1003526364	female	19	Gynecology	20240326	positive	1028909679
1003540670	female	24	Gynecology	20240329	positive	1028960661
1003566720	female	45	Gynecology	20240725	positive	1030587561
1003724293	female	34	Gynecology	20240424	positive	1029304298
1003778220	female	32	Gynecology	20240401	positive	1028985625
1003809440	female	50	Gynecology	20240423	positive	1029280147
1003875041	female	38	Gynecology	20240523	positive	1029694843
1003904703	female	42	Gynecology	20240718	positive	1030473992
1003970686	female	34	Reproductive Gynecology	20240425	positive	1029322462
1003981647	female	54	Reproductive Gynecology	20240301	positive	1028569557
1004032289	female	37	Gynecology	20240417	positive	1029201143
1004062689	female	31	Gynecology	20240208	positive	1028326792
1004073103	female	21	Gynecology	20240103	positive	1027871959
1004074885	female	35	Reproductive Gynecology	20240205	positive	1028294584
1004086934	female	31	Gynecology	20240113	positive	1028009531
1004090827	female	30	Gynecology	20240127	positive	1028192413
1004096010	female	47	Gynecology	20240118	positive	1028070883
1004106918	female	56	Reproductive Gynecology	20240124	positive	1028148207
1004107497	female	50	Gynecology	20240312	positive	1028719152
1004114005	female	58	Gynecology	20240202	positive	1028263230
1004145643	female	25	Reproductive Gynecology	20240322	positive	1028864714
1004150450	female	53	Gynecology	20240227	positive	1028508937
1004158712	female	47	Reproductive Gynecology	20240229	positive	1028556514
1004167136	female	43	Reproductive Gynecology	20240629	positive	1030203864
1004167335	female	32	Gynecology	20240316	positive	1028785330
1004190048	female	19	Gynecology	20240322	positive	1028868664
1004198869	female	44	Gynecology	20240328	positive	1028941354
1004214956	female	26	Gynecology	20240416	positive	1029185956
1004225353	female	60	Gynecology	20240416	positive	1029180948
1004227490	female	27	Gynecology	20240424	positive	1029306135
1004228018	female	36	Gynecology	20240417	positive	1029208683
1004274986	female	52	Gynecology	20240612	positive	1029944271
1004275074	female	28	Reproductive Gynecology	20240524	positive	1029701583
1004319705	female	19	Gynecology	20240621	positive	1030087547
1004325381	female	25	Gynecology	20240620	positive	1030075141
1004326147	female	44	Gynecology	20240628	positive	1030183718
1004333231	female	37	Gynecology	20240629	positive	1030202337
1004336314	female	48	Gynecology	20240629	positive	1030203584
1004350595	female	38	Gynecology	20240706	positive	1030301797
5014460926	female	60	Gynecology	20240709	positive	1030332076
5015670732	female	36	Gynecology	20240627	positive	1030175960
5300-0000401307	female	38	Gynecology	20240302	positive	1028588071
5300-5001084321	female	26	Reproductive Gynecology	20240422	positive	1029264708
5303-0326024389	female	44	Gynecology	20240202	positive	1028261891
5323-2322022975	female	59	Gynecology	20240425	positive	1029322969
5334-3421015176	female	33	Gynecology	20240401	positive	1028983822
0102178688	female	63	Reproductive Gynecology	20231019	positive	1026955469
0103223776	female	47	Gynecology	20230222	positive	1024037649
0111084251	female	68	Gynecology	20230415	positive	1024696600
0111173797	female	36	Gynecology	20231221	positive	1027732932
0111264420	female	37	Reproductive Gynecology	20230203	positive	1023798352
0111297051	female	27	Gynecology	20230118	positive	1023652380
1000027426	female	58	Gynecology	20231122	positive	1027366773
1000064509	female	37	Gynecology	20231104	positive	1027153408
1000077091	female	61	Gynecology	20230818	positive	1026255590
1000150895	female	41	Gynecology	20231109	positive	1027210850
1000180338	female	33	Reproductive Gynecology	20230211	positive	1023905440
1000220978	female	76	Gynecology	20230815	positive	1026207965
1000232053	female	31	Gynecology	20231108	positive	1027201743
1000302955	female	44	Gynecology	20230525	positive	1025171401
1000325223	female	40	Gynecology	20230420	positive	1024758030
1000539196	female	23	Gynecology	20230511	positive	1025001642
1000570278	female	44	Gynecology	20231206	positive	1027542814
1000588702	female	67	Reproductive Gynecology	20230726	positive	1025951943
1000608616	female	25	Gynecology	20230908	positive	1026510887
1000653535	female	26	Gynecology	20230509	positive	1024973008
1000667664	female	38	Gynecology	20231014	positive	1026889626
1000669951	female	38	Gynecology	20231116	positive	1027297850
1000729786	female	30	Gynecology	20230221	positive	1024030001
1000871526	female	61	Gynecology	20230526	positive	1025191720
1001002597	female	39	Gynecology	20230424	positive	1024802729
1001003535	female	49	Gynecology	20231009	positive	1026824204
1001033503	female	35	Gynecology	20230216	positive	1023970419
1001053006	female	31	Reproductive Gynecology	20230901	positive	1026422328
1001059999	female	32	Gynecology	20231102	positive	1027124364
1001062352	female	42	Gynecology	20230113	positive	1023602638
1001258483	female	56	Gynecology	20230902	positive	1026435797
1001464417	female	31	Gynecology	20230505	positive	1024922891
1001488332	female	60	Gynecology	20231117	positive	1027317672
1001501566	female	29	Reproductive Gynecology	20231109	positive	1027214976
1001510667	female	49	Gynecology	20230424	positive	1024803207
1001540860	female	48	Gynecology	20230525	positive	1025173811
1001540860	female	48	Gynecology	20231207	positive	1027558001
1001562792	female	33	Gynecology	20231221	positive	1027734947
1001611576	female	31	Gynecology	20230331	positive	1024520435
1001611576	female	31	Gynecology	20230615	positive	1025435699
1001640730	female	50	Gynecology	20230323	positive	1024421851
1001686563	female	30	Gynecology	20230328	positive	1024468892
1001760978	female	55	Gynecology	20230906	positive	1026478486
1001760978	female	55	Gynecology	20231206	positive	1027545924
1001870789	female	41	Reproductive Gynecology	20230304	positive	1024174316
1001886703	female	52	Gynecology	20230221	positive	1024030203
1001906448	female	34	Gynecology	20231017	positive	1026925801
1001959132	female	51	Gynecology	20231206	positive	1027544335
1001963761	female	47	Gynecology	20230126	positive	1023697793
1001963761	female	47	Gynecology	20230518	positive	1025092158
1001966618	female	35	Gynecology	20230619	positive	1025474537
1002003357	female	36	Gynecology	20231012	positive	1026868776
1002005616	female	36	Reproductive Gynecology	20230506	positive	1024931630
1002027862	female	44	Gynecology	20230608	positive	1025348296
1002045268	female	28	Reproductive Gynecology	20230203	positive	1023793849
1002060466	female	39	Reproductive Gynecology	20230615	positive	1025438359
1002121497	female	33	Gynecology	20230126	positive	1023699389
1002124736	female	58	Gynecology	20231121	positive	1027355509
1002143029	female	50	Gynecology	20230308	positive	1024217785
1002160913	female	41	Reproductive Gynecology	20231228	positive	1027814442
1002220517	female	37	Reproductive Gynecology	20230129	positive	1023710706
1002220517	female	37	Reproductive Gynecology	20230726	positive	1025951117
1002446131	female	40	Gynecology	20230719	positive	1025851358
1002839181	female	60	Gynecology	20230914	positive	1026575038
1002859539	female	44	Gynecology	20230510	positive	1024981375
1002977837	female	39	Gynecology	20230330	positive	1024506552
1003034732	female	33	Gynecology	20230323	positive	1024415659
1003040575	female	25	Gynecology	20230927	positive	1026729194
1003046972	female	36	Gynecology	20230927	positive	1026731023
1003069092	female	47	Gynecology	20230824	positive	1026323420
1003084538	female	26	Gynecology	20230316	positive	1024327380
1003101169	female	68	Reproductive Gynecology	20230404	positive	1024554212
1003122792	female	48	Gynecology	20230831	positive	1026409204
1003123687	female	40	Reproductive Gynecology	20230302	positive	1024149040
1003155293	female	56	Gynecology	20230208	positive	1023854388
1003161882	female	26	Gynecology	20230110	positive	1023565407
1003185165	female	42	Reproductive Gynecology	20230404	positive	1024553650
1003188200	female	38	Reproductive Gynecology	20230614	positive	1025424307
1003191350	female	24	Gynecology	20230725	positive	1025935353
1003213627	female	24	Gynecology	20230328	positive	1024470672
1003332708	female	27	Reproductive Gynecology	20230902	positive	1026433455
1003343275	female	28	Gynecology	20231118	positive	1027330063
1003354467	female	53	Gynecology	20230302	positive	1024149576
1003360433	female	43	Gynecology	20230116	positive	1023622953
1003409102	female	30	Reproductive Gynecology	20230211	positive	1023900745
1003415188	female	28	Gynecology	20230322	positive	1024400748
1003415188	female	29	Gynecology	20230816	positive	1026225016
1003419345	female	25	Gynecology	20230526	positive	1025188516
1003422661	female	62	Gynecology	20230209	positive	1023876890
1003432538	female	31	Gynecology	20230530	positive	1025232491
1003435099	female	30	Gynecology	20230920	positive	1026651238
1003450768	female	35	Gynecology	20230628	positive	1025583915
1003451467	female	54	Gynecology	20230330	positive	1024505635
1003456369	female	29	Gynecology	20230811	positive	1026168446
1003557979	female	31	Gynecology	20230113	positive	1023605140
1003566720	female	44	Gynecology	20230208	positive	1023855849
1003566720	female	44	Gynecology	20230810	positive	1026153419
1003573013	female	40	Gynecology	20230228	positive	1024118042
1003599889	female	28	Gynecology	20230214	positive	1023933009
1003602917	female	41	Gynecology	20230217	positive	1023983128
1003604218	female	34	Gynecology	20230216	positive	1023969853
1003615948	female	76	Gynecology	20230225	positive	1024085834
1003617110	female	59	Gynecology	20230310	positive	1024249324
1003619362	female	50	Gynecology	20230302	positive	1024149757
1003642594	female	19	Reproductive Gynecology	20230317	positive	1024335839
1003647758	female	33	Gynecology	20230321	positive	1024381881
1003654526	female	27	Reproductive Gynecology	20230417	positive	1024708354
1003657715	female	33	Gynecology	20230928	positive	1026740861
1003657715	female	33	Reproductive Gynecology	20230328	positive	1024473540
1003673933	female	62	Gynecology	20230404	positive	1024556282
1003681722	female	47	Gynecology	20230413	positive	1024663198
1003692508	female	28	Gynecology	20230427	positive	1024845202
1003696782	female	37	Gynecology	20230425	positive	1024816219
1003704659	female	24	Gynecology	20230425	positive	1024824112
1003718357	female	20	Gynecology	20231009	positive	1026824739
1003724293	female	34	Gynecology	20230805	positive	1026092394
1003727577	female	54	Gynecology	20230512	positive	1025019259
1003743851	female	42	Gynecology	20230525	positive	1025174966
1003755832	female	29	Reproductive Gynecology	20230605	positive	1025298599
1003757923	female	40	Gynecology	20231027	positive	1027052926
1003772257	female	33	Gynecology	20230629	positive	1025600426
1003778901	female	32	Gynecology	20231028	positive	1027070679
1003786567	female	23	Gynecology	20230624	positive	1025523782
1003796840	female	47	Reproductive Gynecology	20230701	positive	1025625358
1003799562	female	31	Reproductive Gynecology	20230703	positive	1025637607
1003809869	female	27	Reproductive Gynecology	20230711	positive	1025740097
1003822781	female	46	Gynecology	20230718	positive	1025833297
1003827134	female	24	Reproductive Gynecology	20230721	positive	1025884848
1003834047	female	55	Gynecology	20231205	positive	1027529865
1003870483	female	52	Gynecology	20230811	positive	1026169890
1003873685	female	51	Gynecology	20230815	positive	1026210889
1003885301	female	52	Gynecology	20230815	positive	1026210284
1003888203	female	67	Gynecology	20231121	positive	1027354941
1003893555	female	50	Gynecology	20230907	positive	1026494688
1003894004	female	29	Reproductive Gynecology	20230824	positive	1026325823
1003902894	female	19	Gynecology	20230829	positive	1026385187
1003904703	female	41	Gynecology	20230905	positive	1026465442
1003909882	female	22	Gynecology	20230831	positive	1026413292
1003916437	female	23	Gynecology	20231021	positive	1026980998
1003924197	female	20	Gynecology	20230915	positive	1026593305
1003929055	female	55	Gynecology	20230923	positive	1026689756
1003944608	female	45	Gynecology	20230927	positive	1026730801
1003956441	female	52	Gynecology	20231014	positive	1026895344
1003964913	female	32	Gynecology	20231013	positive	1026880962
1003978862	female	33	Gynecology	20231027	positive	1027049811
1003982080	female	28	Gynecology	20231202	positive	1027501381
1003982115	female	22	Reproductive Gynecology	20231025	positive	1027027379
1003986684	female	51	Gynecology	20231104	positive	1027154275
1004000294	female	27	Reproductive Gynecology	20231229	positive	1027827945
1004002443	female	22	Gynecology	20231108	positive	1027203366
1004005148	female	22	Gynecology	20231110	positive	1027228322
1004020780	female	76	Gynecology	20231121	positive	1027360375
1004039141	female	27	Gynecology	20231212	positive	1027615467
1004049875	female	28	Reproductive Gynecology	20231212	positive	1027617349
5300-0000238297	female	64	Gynecology	20230617	positive	1025464436
5329-2900016314	female	54	Reproductive Gynecology	20231124	positive	1027400247
0000166268	female	51	Gynecology	20220218	positive	1019023682
0101086646	female	37	Gynecology	20220818	positive	1021556279
0101298457	female	37	Gynecology	20220210	positive	1018910676
0102130454	female	62	Gynecology	20220806	positive	1021361244
0102178688	female	62	Reproductive Gynecology	20220518	positive	1020176364
0102184170	female	63	Gynecology	20220331	positive	1019560584
0102654621	female	39	Gynecology	20221209	positive	1023305691
0103314715	female	43	Reproductive Gynecology	20220105	positive	1018504596
0103317988	female	32	Gynecology	20220423	positive	1019844891
0111189064	female	40	Gynecology	20221111	positive	1022873261
0111231177	female	38	Gynecology	20220111	positive	1018579861
0112128702	female	56	Gynecology	20220217	positive	1019007645
0112128702	female	56	Gynecology	20220728	positive	1021207523
0112373518	female	26	Gynecology	20221129	positive	1023187381
0181111718	female	45	Gynecology	20220307	positive	1019248505
1000002453	female	56	Reproductive Gynecology	20220718	positive	1021028565
1000061867	female	38	Gynecology	20220119	positive	1018683156
1000092331	female	58	Gynecology	20220421	positive	1019814581
1000111989	female	46	Gynecology	20220325	positive	1019486940
1000150895	female	40	Gynecology	20220928	positive	1022226075
1000189523	female	50	Gynecology	20220908	positive	1021882350
1000248054	female	44	Gynecology	20220610	positive	1020485777
1000250516	female	38	Reproductive Gynecology	20220119	positive	1018681162
1000268558	female	29	Gynecology	20221209	positive	1023299510
1000279145	female	51	Gynecology	20220729	positive	1021221814
1000281408	female	48	Gynecology	20220108	positive	1018555139
1000287961	female	45	Gynecology	20220426	positive	1019878171
1000291288	female	29	Gynecology	20220512	positive	1020091029
1000291930	female	40	Gynecology	20220325	positive	1019490637
1000295749	female	21	Gynecology	20220421	positive	1019816242
1000298170	female	45	Reproductive Gynecology	20220818	positive	1021547979
1000307704	female	52	Gynecology	20220802	positive	1021284316
1000322914	female	43	Gynecology	20220125	positive	1018755358
1000361028	female	40	Reproductive Gynecology	20220211	positive	1018926403
1000361028	female	41	Reproductive Gynecology	20220826	positive	1021687110
1000399187	female	37	Reproductive Gynecology	20220829	positive	1021720499
1000416885	female	50	Gynecology	20220527	positive	1020300704
1000429110	female	30	Gynecology	20220628	positive	1020738511
1000443564	female	22	Gynecology	20220415	positive	1019740878
1000461550	female	57	Reproductive Gynecology	20220927	positive	1022202914
1000481080	female	28	Gynecology	20220222	positive	1019069036
1000552655	female	45	Gynecology	20220722	positive	1021117951
1000611701	female	29	Gynecology	20220215	positive	1018974871
1000632708	female	39	Gynecology	20220302	positive	1019188246
1000669951	female	36	Gynecology	20221027	positive	1022627254
1000809628	female	26	Gynecology	20220317	positive	1019395923
1000809628	female	26	Gynecology	20220702	positive	1020799786
1000815479	female	36	Gynecology	20220107	positive	1018539500
1000819655	female	32	Gynecology	20220510	positive	1020054515
1000819655	female	33	Gynecology	20221013	positive	1022449371
1000842313	female	24	Gynecology	20220310	positive	1019302224
1000879374	female	42	Gynecology	20220118	positive	1018666823
1000880050	female	39	Gynecology	20221230	positive	1023460238
1000945961	female	23	Gynecology	20220225	positive	1019125211
1000948171	female	66	Reproductive Gynecology	20220506	positive	1020002801
1000948171	female	66	Reproductive Gynecology	20221118	positive	1023004813
1000996288	female	35	Reproductive Gynecology	20220923	positive	1022134215
1001003535	female	48	Gynecology	20221101	positive	1022705893
1001011203	female	30	Gynecology	20220818	positive	1021550251
1001040700	female	38	Gynecology	20220104	positive	1018494661
1001072376	female	32	Reproductive Gynecology	20220412	positive	1019691737
1001094212	female	44	Gynecology	20220210	positive	1018907087
1001099347	female	29	Gynecology	20220330	positive	1019549878
1001099347	female	29	Gynecology	20220915	positive	1021998806
1001109107	female	25	Reproductive Gynecology	20220308	positive	1019260909
1001117439	female	40	Gynecology	20220129	positive	1018798987
1001125769	female	54	Gynecology	20220804	positive	1021320419
1001173649	female	46	Gynecology	20220112	positive	1018593831
1001173649	female	46	Gynecology	20220325	positive	1019489094
1001174729	female	49	Reproductive Gynecology	20220211	positive	1018925832
1001217527	female	24	Gynecology	20220823	positive	1021636275
1001226015	female	24	Gynecology	20220413	positive	1019702041
1001229624	female	38	Gynecology	20220428	positive	1019912699
1001229969	female	32	Gynecology	20220616	positive	1020565486
1001236241	female	47	Gynecology	20220127	positive	1018784440
1001262872	female	57	Gynecology	20220423	positive	1019847261
1001267424	female	38	Gynecology	20220712	positive	1020950297
1001277765	female	27	Reproductive Gynecology	20220216	positive	1018994766
1001351069	female	27	Gynecology	20220428	positive	1019914821
1001385450	female	63	Gynecology	20220701	positive	1020790208
1001391683	female	28	Gynecology	20220108	positive	1018556402
1001412299	female	34	Gynecology	20220511	positive	1020079347
1001430362	female	19	Gynecology	20220423	positive	1019848199
1001449459	female	30	Reproductive Gynecology	20220520	positive	1020204242
1001511316	female	39	Gynecology	20221026	positive	1022616334
1001511725	female	33	Reproductive Gynecology	20220514	positive	1020126245
1001528283	female	30	Gynecology	20220311	positive	1019323684
1001540860	female	47	Gynecology	20220707	positive	1020873879
1001540860	female	47	Gynecology	20221207	positive	1023277702
1001542535	female	45	Gynecology	20220519	positive	1020192638
1001571318	female	35	Gynecology	20220816	positive	1021507115
1001591388	female	47	Gynecology	20220826	positive	1021695151
1001604684	female	33	Gynecology	20220331	positive	1019565428
1001606786	female	23	Gynecology	20220311	positive	1019324032
1001611576	female	30	Gynecology	20220921	positive	1022105375
1001677873	female	47	Gynecology	20220817	positive	1021531136
1001683545	female	28	Gynecology	20220712	positive	1020946648
1001686563	female	30	Gynecology	20220624	positive	1020691879
1001689804	female	46	Gynecology	20220112	positive	1018589459
1001689804	female	47	Gynecology	20220817	positive	1021522760
1001704626	female	28	Gynecology	20220421	positive	1019809583
1001704626	female	29	Gynecology	20220428	positive	1019911676
1001704626	female	29	Gynecology	20220730	positive	1021239405
1001720431	female	40	Reproductive Gynecology	20220702	positive	1020805795
1001756481	female	34	Gynecology	20221020	positive	1022524949
1001758503	female	55	Gynecology	20220630	positive	1020775065
1001770242	female	27	Gynecology	20220627	positive	1020716000
1001774699	female	33	Gynecology	20220525	positive	1020266004
1001812669	female	25	Gynecology	20220107	positive	1018543323
1001820795	female	45	Gynecology	20220819	positive	1021568450
1001820795	female	45	Gynecology	20221110	positive	1022855810
1001835591	female	27	Gynecology	20220524	positive	1020253770
1001875506	female	60	Gynecology	20221004	positive	1022281010
1001946544	female	54	Gynecology	20220722	positive	1021109867
1001954779	female	37	Gynecology	20220730	positive	1021244884
1001959967	female	51	Gynecology	20220524	positive	1020254360
1001973303	female	33	Gynecology	20220512	positive	1020093695
1001985806	female	25	Gynecology	20220512	positive	1020097477
1001997292	female	28	Gynecology	20220606	positive	1020406928
1002002702	female	24	Gynecology	20220721	positive	1021099683
1002006618	female	29	Reproductive Gynecology	20221028	positive	1022652531
1002027862	female	43	Gynecology	20220802	positive	1021284843
1002044671	female	46	Gynecology	20220316	positive	1019384394
1002057758	female	71	Gynecology	20220803	positive	1021297095
1002060466	female	38	Reproductive Gynecology	20220425	positive	1019866330
1002089339	female	36	Gynecology	20220915	positive	1022000231
1002098274	female	44	Gynecology	20220112	positive	1018600261
1002108183	female	34	Gynecology	20220212	positive	1018939118
1002143029	female	49	Gynecology	20220302	positive	1019189937
1002143029	female	49	Gynecology	20220818	positive	1021549312
1002148645	female	38	Gynecology	20220602	positive	1020376579
1002153228	female	30	Gynecology	20220922	positive	1022115548
1002179514	female	30	Reproductive Gynecology	20220813	positive	1021471731
1002197965	female	26	Gynecology	20220623	positive	1020673361
1002204465	female	55	Gynecology	20220601	positive	1020366069
1002227199	female	26	Gynecology	20221201	positive	1023217212
1002255204	female	54	Gynecology	20220726	positive	1021171670
1002307294	female	48	Gynecology	20221203	positive	1023242197
1002321944	female	55	Gynecology	20220419	positive	1019779487
1002321944	female	56	Gynecology	20221025	positive	1022587233
1002336130	female	38	Gynecology	20220928	positive	1022224135
1002344801	female	38	Reproductive Gynecology	20220804	positive	1021322613
1002352020	female	33	Reproductive Gynecology	20220505	positive	1019989371
1002357722	female	54	Gynecology	20220216	positive	1018995326
1002358619	female	23	Gynecology	20220719	positive	1021055128
1002361643	female	39	Gynecology	20221011	positive	1022405968
1002398060	female	34	Gynecology	20220924	positive	1022153174
1002398060	female	34	Gynecology	20220924	positive	1022153173
1002416787	female	46	Gynecology	20221013	positive	1022461101
1002422475	female	39	Gynecology	20220720	positive	1021077406
1002442334	female	23	Gynecology	20220728	positive	1021212952
1002446131	female	39	Gynecology	20220217	positive	1019009460
1002446326	female	43	Gynecology	20220506	positive	1020009692
1002466196	female	59	Gynecology	20220211	positive	1018928166
1002473623	female	37	Gynecology	20220428	positive	1019916232
1002517075	female	28	Gynecology	20220711	positive	1020921735
1002521128	female	21	Gynecology	20220416	positive	1019754372
1002523176	female	25	Gynecology	20220507	positive	1020026881
1002526838	female	24	Gynecology	20220120	positive	1018692187
1002552406	female	29	Reproductive Gynecology	20220218	positive	1019027602
1002587566	female	24	Gynecology	20220423	positive	1019846905
1002594972	female	26	Gynecology	20220225	positive	1019122633
1002598773	female	24	Gynecology	20220107	positive	1018542019
1002627704	female	49	Gynecology	20220223	positive	1019092823
1002627704	female	49	Gynecology	20220706	positive	1020854111
1002655321	female	32	Gynecology	20220524	positive	1020255483
1002666866	female	53	Gynecology	20220215	positive	1018976207
1002716031	female	51	Gynecology	20220809	positive	1021391103
1002721255	female	52	Gynecology	20220714	positive	1020987362
1002750346	female	31	Gynecology	20220723	positive	1021131646
1002763588	female	18	Gynecology	20220906	positive	1021853079
1002785773	female	56	Gynecology	20220107	positive	1018539072
1002790434	female	39	Gynecology	20220112	positive	1018594082
1002794942	female	23	Gynecology	20220112	positive	1018598947
1002820845	female	27	Gynecology	20220225	positive	1019118818
1002820845	female	27	Gynecology	20220623	positive	1020674598
1002831792	female	18	Gynecology	20220924	positive	1022158966
1002834456	female	42	Gynecology	20220208	positive	1018861339
1002839181	female	59	Gynecology	20221118	positive	1023006265
1002858835	female	49	Gynecology	20220223	positive	1019092964
1002867990	female	28	Gynecology	20220218	positive	1019025266
1002883297	female	51	Gynecology	20220224	positive	1019106618
1002886305	female	24	Gynecology	20220225	positive	1019124901
1002896505	female	51	Gynecology	20220304	positive	1019223939
1002896700	female	30	Gynecology	20220421	positive	1019814631
1002901970	female	48	Gynecology	20220303	positive	1019206569
1002902170	female	20	Gynecology	20220909	positive	1021901668
1002906822	female	27	Gynecology	20220311	positive	1019315974
1002910340	female	26	Gynecology	20220305	positive	1019242540
1002917956	female	60	Gynecology	20220312	positive	1019338293
1002924232	female	32	Gynecology	20220407	positive	1019635653
1002939110	female	22	Gynecology	20221214	positive	1023348406
1002943628	female	49	Gynecology	20220330	positive	1019546818
1002943908	female	50	Gynecology	20220329	positive	1019533124
1002953662	female	30	Gynecology	20220407	positive	1019627574
1002961722	female	27	Reproductive Gynecology	20220408	positive	1019651581
1002962101	female	36	Gynecology	20220407	positive	1019633544
1002966867	female	52	Gynecology	20220408	positive	1019650896
1002973100	female	46	Gynecology	20220412	positive	1019689246
1002974139	female	59	Gynecology	20220412	positive	1019693491
1002974139	female	60	Gynecology	20221110	positive	1022862065
1002986065	female	83	Gynecology	20220420	positive	1019799132
1002987967	female	23	Gynecology	20220421	positive	1019817155
1002991758	female	32	Gynecology	20220623	positive	1020671960
1002991917	female	25	Reproductive Gynecology	20220422	positive	1019827337
1002996956	female	33	Gynecology	20220628	positive	1020738912
1003025510	female	33	Gynecology	20220624	positive	1020681476
1003025821	female	33	Reproductive Gynecology	20220506	positive	1020009506
1003043810	female	28	Gynecology	20220519	positive	1020191532
1003049925	female	51	Gynecology	20220519	positive	1020187531
1003056277	female	21	Gynecology	20220521	positive	1020215660
1003061260	female	43	Gynecology	20220527	positive	1020302643
1003063758	female	19	Gynecology	20220531	positive	1020350659
1003091835	男	31	Gynecology	20220607	positive	1020436016
1003095180	female	34	Gynecology	20220610	positive	1020485529
1003095597	female	42	Gynecology	20220609	positive	1020470005
1003101241	female	58	Gynecology	20220927	positive	1022199203
1003109917	female	31	Gynecology	20220621	positive	1020637172
1003121278	female	34	Gynecology	20220623	positive	1020670590
1003122081	female	32	Gynecology	20220625	positive	1020706137
1003128385	female	24	Gynecology	20220711	positive	1020920076
1003131284	female	30	Gynecology	20220701	positive	1020787357
1003131477	female	26	Gynecology	20220624	positive	1020691834
1003148305	female	30	Gynecology	20220705	positive	1020842396
1003161742	female	58	Gynecology	20220712	positive	1020947500
1003171154	female	51	Gynecology	20220715	positive	1020999094
1003178725	female	56	Gynecology	20220719	positive	1021054546
1003180930	female	42	Gynecology	20220722	positive	1021113115
1003192811	female	46	Gynecology	20220722	positive	1021109535
1003212350	female	54	Reproductive Gynecology	20220728	positive	1021211390
1003217087	female	28	Reproductive Gynecology	20220726	positive	1021164190
1003238956	female	26	Gynecology	20220817	positive	1021533355
1003260628	female	35	Gynecology	20220811	positive	1021433496
1003267555	female	23	Gynecology	20220809	positive	1021391392
1003268323	female	22	Gynecology	20221005	positive	1022321896
1003281119	female	29	Gynecology	20220812	positive	1021455093
1003300018	female	43	Reproductive Gynecology	20220818	positive	1021550595
1003305723	female	51	Gynecology	20220826	positive	1021695589
1003317339	female	24	Gynecology	20221020	positive	1022528588
1003317916	female	31	Gynecology	20220831	positive	1021760700
1003323579	female	54	Gynecology	20220901	positive	1021777895
1003327355	female	43	Gynecology	20220830	positive	1021746833
1003333157	female	30	Reproductive Gynecology	20220831	positive	1021764992
1003352317	female	34	Gynecology	20220908	positive	1021890980
1003358031	female	33	Gynecology	20221207	positive	1023280008
1003369729	female	18	Gynecology	20220920	positive	1022082712
1003370601	female	27	Gynecology	20220916	positive	1022025335
1003371524	female	31	Reproductive Gynecology	20221223	positive	1023403250
1003372340	female	40	Gynecology	20221013	positive	1022459268
1003372569	female	60	Gynecology	20220917	positive	1022036443
1003390765	female	44	Gynecology	20220926	positive	1022170120
1003425089	female	64	Gynecology	20221013	positive	1022459081
1003438764	female	29	Gynecology	20221027	positive	1022631242
1003483064	female	33	Reproductive Gynecology	20221117	positive	1022985518
1003483701	female	37	Gynecology	20221118	positive	1023004368
1003496715	female	50	Gynecology	20221124	positive	1023105482
1003499812	female	30	Gynecology	20221129	positive	1023159491
1003506576	female	32	Gynecology	20221202	positive	1023229432
1003506984	female	76	Gynecology	20221206	positive	1023261483
1003510292	female	55	Gynecology	20221213	positive	1023335875
1003538497	female	28	Gynecology	20221220	positive	1023382072
5300-0000068459	female	59	Gynecology	20220303	positive	1019208545
5300-0000108079	female	52	Gynecology	20220414	positive	1019727417
5300-0000148468	female	52	Gynecology	20220801	positive	1021256994
5300-0000774347	female	38	Reproductive Gynecology	20220329	positive	1019534757
5300-0000775970	female	31	Gynecology	20220707	positive	1020872337
5304-0425007561	female	52	Gynecology	20220728	positive	1021212127
5323-5230014380	female	25	Gynecology	20220514	positive	1020128072
5327-2726007743	female	66	Gynecology	20221102	positive	1022722570
5329-2900016314	female	53	Reproductive Gynecology	20220921	positive	1022100008
5330-3024009250	female	54	Gynecology	20220425	positive	1019862566
0101293070	female	32	Gynecology	20210412	positive	1015393929
0101293070	female	33	Gynecology	20211009	positive	1017478344
0101299498	female	36	Gynecology	20210712	positive	1016426565
0102184170	female	62	Gynecology	20210522	positive	1015858601
0102543723	female	33	Gynecology	20210610	positive	1016075150
0102573026	female	47	Gynecology	20210312	positive	1015039520
0102658744	female	32	Gynecology	20210908	positive	1017159602
0103071676	female	73	Gynecology	20210920	positive	1017287317
0103165060	female	52	Gynecology	20210317	positive	1015091434
0103165060	female	53	Gynecology	20210623	positive	1016207416
0103352155	female	29	Gynecology	20210319	positive	1015125625
0103400677	female	36	Gynecology	20210819	positive	1016914119
0111055284	female	58	Gynecology	20210729	positive	1016661566
0111187942	female	39	Gynecology	20210306	positive	1014966951
0111187942	female	39	Gynecology	20210818	positive	1016904264
0111187942	female	40	Gynecology	20211225	positive	1018399065
0111231177	female	37	Gynecology	20210708	positive	1016390302
0112128702	female	55	Gynecology	20210520	positive	1015836420
0112128702	female	55	Gynecology	20210826	positive	1016998737
0124003168	female	40	Gynecology	20210121	positive	1014518347
1000061867	female	37	Gynecology	20210929	positive	1017394773
1000099567	female	29	Reproductive Gynecology	20211210	positive	1018215406
1000120028	female	31	Gynecology	20210331	positive	1015264225
1000142307	female	27	Gynecology	20210127	positive	1014588114
1000143266	female	56	Gynecology	20211106	positive	1017829835
1000155064	female	30	Reproductive Gynecology	20210715	positive	1016477782
1000186559	female	43	Gynecology	20211211	positive	1018226877
1000198976	female	33	Gynecology	20210612	positive	1016100993
1000240104	female	55	Gynecology	20210508	positive	1015690010
1000248054	female	43	Gynecology	20210415	positive	1015442814
1000248054	female	44	Gynecology	20210729	positive	1016657335
1000279145	female	50	Gynecology	20210402	positive	1015295344
1000291288	female	28	Gynecology	20211014	positive	1017551299
1000301654	female	46	Gynecology	20210320	positive	1015136644
1000301654	female	47	Gynecology	20210731	positive	1016690537
1000309716	female	29	Gynecology	20210111	positive	1014412463
1000335720	female	53	Gynecology	20211225	positive	1018396789
1000338728	female	61	Gynecology	20210702	positive	1016323310
1000345023	female	35	Reproductive Gynecology	20210609	positive	1016055584
1000361156	female	36	Reproductive Gynecology	20210528	positive	1015925118
1000373474	female	56	Reproductive Gynecology	20210703	positive	1016335960
1000455887	female	55	Gynecology	20210630	positive	1016294642
1000534354	female	64	Gynecology	20210402	positive	1015295480
1000539196	female	21	Gynecology	20210429	positive	1015608433
1000550231	female	68	Gynecology	20211117	positive	1017954540
1000565995	female	32	Gynecology	20210106	positive	1014366743
1000611701	female	28	Gynecology	20210930	positive	1017412589
1000633299	female	47	Gynecology	20210521	positive	1015844899
1000669909	female	55	Gynecology	20210916	positive	1017254500
1000702641	female	41	Gynecology	20211218	positive	1018307761
1000713643	female	40	Gynecology	20210429	positive	1015604563
1000715664	female	42	Gynecology	20210916	positive	1017256504
1000732795	female	57	Gynecology	20211203	positive	1018131278
1000747909	female	36	Gynecology	20210722	positive	1016563569
1000749582	female	37	Gynecology	20210310	positive	1015013778
1000749582	female	37	Gynecology	20210827	positive	1017015044
1000768491	female	36	Reproductive Gynecology	20210603	positive	1015993305
1000808622	female	44	Gynecology	20210924	positive	1017333755
1000809628	female	25	Gynecology	20210717	positive	1016512144
1000815479	female	35	Gynecology	20210327	positive	1015222458
1000871526	female	59	Gynecology	20210930	positive	1017408422
1000873776	female	44	Reproductive Gynecology	20211105	positive	1017811396
1000879374	female	42	Gynecology	20210701	positive	1016311390
1000885167	female	24	Gynecology	20210123	positive	1014544675
1000885167	female	25	Gynecology	20210608	positive	1016042707
1000906059	female	57	Gynecology	20210716	positive	1016495958
1000920537	female	35	Gynecology	20211013	positive	1017527547
1000953768	female	30	Gynecology	20211221	positive	1018337532
1000983917	female	57	Gynecology	20211117	positive	1017950050
1000985845	female	22	Gynecology	20211118	positive	1017963625
1001003535	female	47	Gynecology	20211012	positive	1017521197
1001040781	female	37	Reproductive Gynecology	20210112	positive	1014427023
1001046997	female	43	Gynecology	20210619	positive	1016172895
1001076321	female	43	Gynecology	20211014	positive	1017544133
1001096570	female	22	Gynecology	20210120	positive	1014512518
1001121497	female	27	Reproductive Gynecology	20210114	positive	1014450862
1001127176	female	42	Gynecology	20210408	positive	1015357030
1001153171	female	37	Gynecology	20211106	positive	1017828894
1001167400	female	40	Reproductive Gynecology	20210303	positive	1014926586
1001174849	female	37	Gynecology	20211119	positive	1017971870
1001179660	female	36	Gynecology	20211014	positive	1017545039
1001236241	female	46	Gynecology	20210511	positive	1015725614
1001236241	female	46	Gynecology	20210805	positive	1016747059
1001268207	female	37	Gynecology	20210305	positive	1014957010
1001268207	female	37	Gynecology	20210723	positive	1016585063
1001269421	female	41	Gynecology	20210629	positive	1016276835
1001299560	female	50	Gynecology	20210227	positive	1014885432
1001305946	female	32	Gynecology	20210512	positive	1015740465
1001319849	female	35	Gynecology	20210106	positive	1014369832
1001326028	female	26	Gynecology	20211008	positive	1017465246
1001346673	female	29	Gynecology	20211106	positive	1017829593
1001368922	female	54	Gynecology	20211120	positive	1017987109
1001374254	female	25	Gynecology	20211211	positive	1018226933
1001417061	female	28	Gynecology	20211109	positive	1017857826
1001424914	female	44	Gynecology	20210121	positive	1014525632
1001441455	female	46	Gynecology	20210612	positive	1016101531
1001447827	female	43	Gynecology	20210926	positive	1017356399
1001488332	female	58	Gynecology	20210811	positive	1016815425
1001498335	female	56	Gynecology	20211231	positive	1018481811
1001528283	female	29	Gynecology	20210708	positive	1016391674
1001529722	female	35	Gynecology	20211124	positive	1018033394
1001553289	female	37	Gynecology	20211104	positive	1017803055
1001575809	female	34	Gynecology	20210222	positive	1014804082
1001591493	female	29	Gynecology	20210721	positive	1016549386
1001606786	female	23	Gynecology	20210817	positive	1016888880
1001616327	female	56	Gynecology	20210714	positive	1016465811
1001621813	female	52	Gynecology	20210706	positive	1016357312
1001644599	female	39	Reproductive Gynecology	20210520	positive	1015832649
1001675543	female	22	Gynecology	20210120	positive	1014510381
1001675543	female	22	Gynecology	20210616	positive	1016126257
1001677873	female	47	Gynecology	20211204	positive	1018147217
1001686563	female	28	Gynecology	20210323	positive	1015165484
1001686563	female	29	Gynecology	20210717	positive	1016511374
1001689804	female	45	Gynecology	20210222	positive	1014802164
1001689804	female	46	Gynecology	20210818	positive	1016896417
1001720431	female	39	Gynecology	20210116	positive	1014474403
1001758503	female	54	Gynecology	20211014	positive	1017546611
1001791354	female	36	Gynecology	20210318	positive	1015115673
1001791444	female	51	Gynecology	20210423	positive	1015539032
1001792015	female	47	Gynecology	20210508	positive	1015691612
1001799560	female	63	Gynecology	20210429	positive	1015611041
1001801005	female	69	Gynecology	20210422	positive	1015525382
1001809699	female	26	Gynecology	20210407	positive	1015338423
1001838531	female	43	Gynecology	20210525	positive	1015887645
1001839371	female	39	Gynecology	20210302	positive	1014902383
1001840712	female	48	Gynecology	20210603	positive	1015989585
1001840712	female	48	Gynecology	20211119	positive	1017979545
1001871886	female	35	Gynecology	20210402	positive	1015294971
1001878928	female	30	Gynecology	20210113	positive	1014440275
1001889984	female	54	Gynecology	20210609	positive	1016060496
1001899945	female	58	Gynecology	20210119	positive	1014495599
1001906448	female	32	Gynecology	20210129	positive	1014613611
1001906448	female	32	Gynecology	20211217	positive	1018295347
1001917613	female	30	Gynecology	20210818	positive	1016903962
1001918583	female	54	Gynecology	20210608	positive	1016046010
1001924818	female	23	Gynecology	20211126	positive	1018060231
1001932866	female	36	Gynecology	20210310	positive	1015016565
1001940506	female	31	Gynecology	20210112	positive	1014423778
1001940722	female	38	Gynecology	20211223	positive	1018368751
1001958359	female	25	Gynecology	20210415	positive	1015441380
1001965725	female	28	Gynecology	20210723	positive	1016584113
1001971788	female	33	Reproductive Gynecology	20210416	positive	1015455664
1001997292	female	27	Gynecology	20210322	positive	1015150810
1001997292	female	27	Gynecology	20211122	positive	1018000037
1002021920	female	29	Gynecology	20210316	positive	1015084084
1002023507	female	26	Gynecology	20210518	positive	1015806595
1002028433	female	33	Gynecology	20210323	positive	1015163939
1002031238	female	26	Gynecology	20210316	positive	1015084822
1002035565	female	53	Gynecology	20210330	positive	1015253374
1002035565	female	54	Gynecology	20211027	positive	1017698060
1002037272	female	36	Gynecology	20210331	positive	1015268490
1002061635	female	29	Gynecology	20210206	positive	1014697368
1002071165	female	27	Reproductive Gynecology	20210520	positive	1015831501
1002085591	female	32	Gynecology	20211119	positive	1017973036
1002089117	female	54	Gynecology	20211215	positive	1018263627
1002098274	female	43	Gynecology	20210324	positive	1015186748
1002106143	female	53	Gynecology	20211103	positive	1017787156
1002130566	female	49	Gynecology	20210819	positive	1016911484
1002138646	female	47	Gynecology	20211117	positive	1017946975
1002150210	female	29	Gynecology	20210108	positive	1014393371
1002153907	female	27	Gynecology	20210318	positive	1015116814
1002156141	female	50	Gynecology	20210120	positive	1014512068
1002157258	female	45	Gynecology	20210430	positive	1015620147
1002164099	female	32	Gynecology	20210121	positive	1014520570
1002188927	female	46	Gynecology	20211203	positive	1018135352
1002191009	female	27	Gynecology	20210610	positive	1016069540
1002198035	female	32	Gynecology	20210305	positive	1014959638
1002207380	female	32	Gynecology	20210219	positive	1014770179
1002210514	female	75	Gynecology	20210220	positive	1014790029
1002221985	female	41	Gynecology	20210225	positive	1014861194
1002221985	female	42	Gynecology	20211001	positive	1017419714
1002222392	female	36	Reproductive Gynecology	20210225	positive	1014861715
1002225535	female	64	Gynecology	20210304	positive	1014942681
1002228431	female	25	Gynecology	20210316	positive	1015079214
1002232669	female	36	Gynecology	20210812	positive	1016829940
1002236037	female	48	Gynecology	20210417	positive	1015469187
1002243345	female	19	Gynecology	20210817	positive	1016886044
1002245673	female	58	Gynecology	20210310	positive	1015018239
1002248876	female	41	Gynecology	20210510	positive	1015702232
1002272670	female	39	Gynecology	20210326	positive	1015209840
1002278889	female	33	Gynecology	20210331	positive	1015267579
1002280253	female	32	Reproductive Gynecology	20210331	positive	1015264985
1002282158	female	50	Gynecology	20210928	positive	1017383994
1002296117	female	35	Gynecology	20210413	positive	1015413612
1002301353	female	46	Gynecology	20210414	positive	1015429969
1002312870	female	24	Reproductive Gynecology	20210420	positive	1015493822
1002313964	female	37	Gynecology	20210421	positive	1015509411
1002316207	female	44	Gynecology	20210422	positive	1015523425
1002321944	female	54	Gynecology	20210426	positive	1015566214
1002321944	female	55	Gynecology	20211123	positive	1018014304
1002331929	female	33	Gynecology	20210817	positive	1016879043
1002335443	female	39	Gynecology	20210507	positive	1015678207
1002336137	female	51	Gynecology	20210728	positive	1016643426
1002345797	female	51	Gynecology	20210527	positive	1015914904
1002346265	female	57	Gynecology	20210511	positive	1015725979
1002349607	female	26	Gynecology	20210514	positive	1015767890
1002354090	female	29	Gynecology	20211202	positive	1018122182
1002364437	female	46	Gynecology	20210524	positive	1015866918
1002368234	female	49	Reproductive Gynecology	20210526	positive	1015900577
1002369641	female	51	Gynecology	20210601	positive	1015960603
1002374017	female	33	Gynecology	20211214	positive	1018256568
1002376489	female	57	Gynecology	20210604	positive	1016005445
1002388995	female	29	Gynecology	20210608	positive	1016046477
1002411207	female	40	Gynecology	20210623	positive	1016212804
1002422475	female	38	Gynecology	20210630	positive	1016289776
1002427693	female	22	Gynecology	20211130	positive	1018091930
1002428142	female	48	Gynecology	20211217	positive	1018295507
1002432025	female	23	Gynecology	20210707	positive	1016375141
1002433341	female	19	Gynecology	20210706	positive	1016362794
1002439221	female	29	Reproductive Gynecology	20210709	positive	1016405548
1002445777	female	32	Gynecology	20210713	positive	1016439830
1002446131	female	38	Gynecology	20210715	positive	1016482577
1002461974	female	41	Gynecology	20210720	positive	1016534293
1002473623	female	36	Gynecology	20211123	positive	1018019335
1002482310	female	47	Gynecology	20210730	positive	1016671994
1002485755	female	35	Gynecology	20210730	positive	1016667254
1002497634	female	53	Gynecology	20210812	positive	1016831997
1002503548	female	38	Gynecology	20210807	positive	1016773942
1002506065	female	22	Gynecology	20211229	positive	1018443066
1002526706	female	60	Gynecology	20210819	positive	1016913768
1002529036	female	33	Gynecology	20210821	positive	1016943350
1002535416	female	41	Gynecology	20210824	positive	1016966923
1002537320	female	49	Gynecology	20210825	positive	1016985127
1002538094	female	30	Gynecology	20210825	positive	1016989144
1002576569	female	56	Gynecology	20210914	positive	1017218482
1002576569	female	56	Gynecology	20211216	positive	1018280095
1002581896	female	33	Gynecology	20210916	positive	1017248774
1002618427	female	31	Reproductive Gynecology	20211120	positive	1017992935
1002636165	female	22	Gynecology	20211022	positive	1017642914
1002640075	female	27	Gynecology	20211020	positive	1017619201
1002648354	female	45	Gynecology	20211028	positive	1017716008
1002651121	female	45	Gynecology	20211026	positive	1017686426
1002663739	female	60	Gynecology	20211222	positive	1018353380
1002677189	female	34	Gynecology	20211112	positive	1017896665
1002679781	female	27	Gynecology	20211113	positive	1017908614
1002695774	female	29	Gynecology	20211123	positive	1018013473
1002699510	female	41	Gynecology	20211126	positive	1018059812
1002699756	female	38	Gynecology	20211130	positive	1018092278
1002704860	female	41	Gynecology	20211215	positive	1018266537
1002707424	female	44	Gynecology	20211125	positive	1018047225
1002708814	female	27	Gynecology	20211130	positive	1018089415
1002714781	female	67	Gynecology	20211201	positive	1018110173
1002716187	female	29	Gynecology	20211204	positive	1018144053
1002721508	female	41	Gynecology	20211210	positive	1018213713
1002736190	female	50	Gynecology	20211211	positive	1018224120
1002736374	female	24	Gynecology	20211216	positive	1018286329
1002738942	female	22	Gynecology	20211217	positive	1018299921
1002751030	female	20	Gynecology	20211225	positive	1018400552
1002769797	female	30	Gynecology	20211230	positive	1018449816
1002777187	female	26	Gynecology	20211231	positive	1018481260
5010322486	female	29	Gynecology	20210106	positive	1014366784
5010730178	female	51	Gynecology	20210909	positive	1017172403
5010765339	female	28	Gynecology	20210203	positive	1014661058
5010765339	female	29	Gynecology	20210715	positive	1016481480
5300-0000089792	female	64	Gynecology	20211010	positive	1017498660
5300-0000434999	female	37	Reproductive Gynecology	20210414	positive	1015428433
5300-0000846253	female	33	Gynecology	20210224	positive	1014841768
5303-0301121099	female	53	Gynecology	20210724	positive	1016596025
5303-0301121099	female	53	Gynecology	20211119	positive	1017978171
5306-0601018358	female	56	Gynecology	20211208	positive	1018188748
5306-0628002968	female	57	Gynecology	20210522	positive	1015858731
5329-5290064529	female	42	Gynecology	20210203	positive	1014659829
5335-3523000985	female	49	Gynecology	20210127	positive	1014585888
LS10302590	female	59		20210410	positive	7100781232
LS10315150	female	59		20210706	positive	7100809949
0000097966	female	45	Gynecology	20201219	positive	1014195777
0101016650	female	49	Reproductive Gynecology	20201113	positive	1013814538
0101076836	female	49	Gynecology	20201021	positive	1013575244
0101220723	female	40	Gynecology	20200925	positive	1013345522
0101299498	female	35	Gynecology	20200513	positive	1011938418
0101299498	female	36	Gynecology	20201118	positive	1013861896
0102184170	female	62	Gynecology	20201029	positive	1013659679
0102194411	female	56	Gynecology	20200701	positive	1012493931
0102268784	female	37	Gynecology	20201205	positive	1014048806
0102309449	female	35	Gynecology	20200327	positive	1011539630
0102665569	female	34	Gynecology	20201012	positive	1013462172
0102714429	female	23	Gynecology	20201027	positive	1013632386
0103071676	female	72	Gynecology	20200925	positive	1013348494
0103223776	female	44	Gynecology	20200603	positive	1012140057
0103288623	female	31	Gynecology	20200526	positive	1012060186
0103400677	female	35	Gynecology	20201107	positive	1013755453
0111084251	female	66	Gynecology	20200822	positive	1013011889
0111187942	female	39	Gynecology	20201110	positive	1013770277
0111194522	female	34	Gynecology	20200730	positive	1012766555
0154040791	female	35	Gynecology	20200108	positive	1011073730
1000035500	female	45	Gynecology	20200611	positive	1012219255
1000111849	female	30	Gynecology	20200820	positive	1012988422
1000120028	female	31	Gynecology	20200826	positive	1013046232
1000163260	female	44	Gynecology	20200929	positive	1013383861
1000178481	female	30	Gynecology	20200429	positive	1011824491
1000189345	female	46	Gynecology	20201110	positive	1013774224
1000190888	female	51	Gynecology	20200512	positive	1011932442
1000199224	female	32	Gynecology	20200622	positive	1012313054
1000199224	female	32	Gynecology	20201214	positive	1014131590
1000235780	female	39	Gynecology	20200229	positive	1011335909
1000263166	female	32	Gynecology	20200408	positive	1011631888
1000279445	female	45	Gynecology	20200806	positive	1012834784
1000301654	female	46	Gynecology	20200514	positive	1011955472
1000357209	female	23	Gynecology	20200526	positive	1012063634
1000411730	female	59	Gynecology	20201216	positive	1014157357
1000456627	female	34	Reproductive Gynecology	20200925	positive	1013349245
1000501215	female	23	Gynecology	20200908	positive	1013170985
1000532699	female	47	Gynecology	20200430	positive	1011841796
1000553449	female	30	Gynecology	20201118	positive	1013866133
1000611701	female	28	Gynecology	20201210	positive	1014102338
1000626592	female	33	Gynecology	20200421	positive	1011751595
1000665426	female	38	Gynecology	20200711	positive	1012586492
1000702625	female	46	Gynecology	20201223	positive	1014234177
1000710022	female	29	Gynecology	20201021	positive	1013575078
1000717060	female	53	Reproductive Gynecology	20201014	positive	1013493292
1000726348	female	52	Gynecology	20201110	positive	1013779162
1000731270	female	45	Gynecology	20200513	positive	1011943027
1000780499	female	35	Gynecology	20200724	positive	1012708009
1000783056	female	47	Gynecology	20201006	positive	1013401767
1000813029	female	37	Gynecology	20201128	positive	1013979112
1000819919	female	48	Gynecology	20201012	positive	1013465092
1000820141	female	40	Gynecology	20201024	positive	1013606579
1000850152	female	46	Gynecology	20200703	positive	1012514220
1000856788	female	47	Gynecology	20201110	positive	1013775967
1000862397	female	43	Gynecology	20201013	positive	1013484530
1000870215	female	31	Reproductive Gynecology	20201015	positive	1013512471
1000871526	female	58	Gynecology	20200430	positive	1011840966
1000893998	female	45	Gynecology	20200825	positive	1013029816
1000903240	female	31	Gynecology	20200611	positive	1012217216
1000918128	female	34	Reproductive Gynecology	20200908	positive	1013175561
1000919940	female	37	Reproductive Gynecology	20200123	positive	1011208124
1000919960	female	46	Reproductive Gynecology	20201127	positive	1013963347
1000965236	female	29	Gynecology	20201121	positive	1013902046
1000976934	female	33	Gynecology	20200509	positive	1011909630
1001014957	female	34	Gynecology	20200511	positive	1011917069
1001042287	female	50	Gynecology	20200630	positive	1012480749
1001044324	female	26	Reproductive Gynecology	20200611	positive	1012219946
1001062288	female	37	Gynecology	20201021	positive	1013570260
1001088347	female	22	Gynecology	20200429	positive	1011830625
1001088347	female	23	Gynecology	20200909	positive	1013189608
1001094212	female	42	Gynecology	20200725	positive	1012717721
1001121132	female	33	Reproductive Gynecology	20201121	positive	1013902444
1001134351	female	25	Gynecology	20200514	positive	1011957600
1001135964	female	23	Gynecology	20200908	positive	1013175184
1001179660	female	34	Gynecology	20200222	positive	1011307954
1001196070	female	38	Gynecology	20200918	positive	1013277798
1001212431	female	28	Gynecology	20200307	positive	1011380549
1001214660	female	47	Gynecology	20200429	positive	1011825383
1001224690	female	26	Reproductive Gynecology	20200526	positive	1012061086
1001227727	female	20	Gynecology	20200424	positive	1011786484
1001236241	female	46	Gynecology	20201217	positive	1014176938
1001266476	female	28	Gynecology	20200805	positive	1012820273
1001269421	female	40	Gynecology	20201208	positive	1014073441
1001296143	female	57	Gynecology	20200603	positive	1012140053
1001298566	female	31	Gynecology	20200226	positive	1011320755
1001310922	female	46	Gynecology	20201014	positive	1013500828
1001326028	female	24	Gynecology	20200122	positive	1011200728
1001329685	female	34	Gynecology	20200429	positive	1011827736
1001329710	female	56	Gynecology	20200716	positive	1012629923
1001339462	female	32	Gynecology	20201215	positive	1014142898
1001363858	female	34	Gynecology	20200422	positive	1011761252
1001390898	female	34	Gynecology	20200729	positive	1012754132
1001417117	female	30	Reproductive Gynecology	20200408	positive	1011630891
1001443685	female	53	Gynecology	20200707	positive	1012545072
1001460892	female	33	Gynecology	20200116	positive	1011145070
1001497611	female	38	Gynecology	20200117	positive	1011161574
1001509259	female	28	Gynecology	20200610	positive	1012208703
1001528283	female	28	Gynecology	20200406	positive	1011608441
1001528283	female	29	Gynecology	20201204	positive	1014038427
1001536972	female	57	Reproductive Gynecology	20200204	positive	1011248633
1001555770	female	32	Gynecology	20200604	positive	1012148717
1001571486	female	25	Gynecology	20201013	positive	1013484307
1001592161	female	46	Gynecology	20201119	positive	1013877991
1001603598	female	27	Gynecology	20200619	positive	1012295424
1001606692	female	45	Gynecology	20201203	positive	1014028735
1001622305	female	62	Gynecology	20200930	positive	1013394688
1001629396	female	38	Gynecology	20200304	positive	1011359013
1001629396	female	38	Gynecology	20200616	positive	1012253126
1001639221	female	35	Gynecology	20201203	positive	1014026758
1001662146	female	48	Reproductive Gynecology	20200707	positive	1012544819
1001675543	female	21	Gynecology	20200902	positive	1013119378
1001680409	female	20	Gynecology	20200115	positive	1011138859
1001685161	female	28	Gynecology	20200118	positive	1011170110
1001699196	female	31	Gynecology	20200220	positive	1011297476
1001704626	female	27	Gynecology	20200630	positive	1012476045
1001712012	female	63	Gynecology	20200312	positive	1011416798
1001720431	female	39	Gynecology	20200821	positive	1012994314
1001742828	female	20	Gynecology	20201219	positive	1014199985
1001760542	female	33	Gynecology	20200928	positive	1013369948
1001761412	female	51	Reproductive Gynecology	20201107	positive	1013755442
1001764242	female	32	Gynecology	20200424	positive	1011783556
1001779224	female	45	Gynecology	20200513	positive	1011943509
1001789027	female	51	Gynecology	20200513	positive	1011943921
1001792015	female	46	Gynecology	20200515	positive	1011963819
1001796971	female	43	Gynecology	20200519	positive	1011992986
1001801005	female	69	Gynecology	20201029	positive	1013659911
1001809258	female	18	Gynecology	20200527	positive	1012076594
1001809377	female	45	Gynecology	20201124	positive	1013924960
1001813779	female	23	Gynecology	20200530	positive	1012108911
1001815964	female	52	Gynecology	20200602	positive	1012123571
1001819958	female	48	Gynecology	20200604	positive	1012151598
1001820795	female	43	Gynecology	20200604	positive	1012152269
1001837090	female	45	Gynecology	20200624	positive	1012334870
1001838390	female	22	Gynecology	20200618	positive	1012279242
1001849773	female	49	Gynecology	20200626	positive	1012348888
1001854816	female	33	Gynecology	20200701	positive	1012494520
1001859439	female	39	Gynecology	20200703	positive	1012513979
1001866063	female	30	Gynecology	20200708	positive	1012553609
1001873242	female	67	Reproductive Gynecology	20200715	positive	1012616315
1001881229	female	48	Gynecology	20201210	positive	1014101673
1001889436	female	39	Gynecology	20201117	positive	1013849708
1001889505	female	32	Gynecology	20200723	positive	1012699341
1001900143	female	31	Gynecology	20200730	positive	1012766469
1001906211	female	38	Gynecology	20200806	positive	1012822865
1001912392	female	26	Gynecology	20200806	positive	1012835776
1001916287	female	52	Gynecology	20200808	positive	1012859103
1001919439	female	35	Gynecology	20200812	positive	1012894771
1001929241	female	38	Gynecology	20200814	positive	1012923512
1001930664	female	32	Gynecology	20200821	positive	1012997198
1001932866	female	36	Gynecology	20200905	positive	1013152161
1001947303	female	76	Gynecology	20200827	positive	1013062373
1001960905	female	27	Gynecology	20201222	positive	1014215396
1001965725	female	27	Gynecology	20200903	positive	1013127485
1001966758	female	49	Gynecology	20200917	positive	1013267167
1001969336	female	43	Gynecology	20201028	positive	1013644908
1001980234	female	23	Gynecology	20200915	positive	1013240243
1001997451	female	29	Reproductive Gynecology	20200924	positive	1013338239
1002002339	female	22	Gynecology	20200928	positive	1013368941
1002004608	female	23	Gynecology	20200929	positive	1013384301
1002005193	female	27	Gynecology	20200930	positive	1013390412
1002028543	female	22	Gynecology	20201022	positive	1013583450
1002029498	female	24	Gynecology	20201027	positive	1013632456
1002037272	female	35	Gynecology	20201023	positive	1013599997
1002048909	female	28	Gynecology	20201225	positive	1014254729
1002050632	female	52	Gynecology	20201103	positive	1013705479
1002058361	female	54	Gynecology	20201106	positive	1013739003
1002064919	female	26	Gynecology	20201110	positive	1013778616
1002070806	female	26	Gynecology	20201215	positive	1014147390
1002071165	female	26	Reproductive Gynecology	20201114	positive	1013826665
1002071179	female	31	Gynecology	20201114	positive	1013826294
1002095906	female	39	Gynecology	20201201	positive	1013992770
1002104869	female	66	Gynecology	20201209	positive	1014090081
1002124043	female	59	Reproductive Gynecology	20201219	positive	1014198556
1002130566	female	48	Gynecology	20201231	positive	1014315980
1002131836	female	34	Gynecology	20201228	positive	1014277601
1002132397	female	48	Gynecology	20201225	positive	1014256562
1002138646	female	46	Gynecology	20201230	positive	1014301394
5010765339	female	28	Gynecology	20201110	positive	1013778967
5013391795	female	48	Gynecology	20200708	positive	1012555642
5300-0000257076	female	49	Gynecology	20200930	positive	1013393415
5303-0322038573	female	31	Gynecology	20200925	positive	1013342624
5306-0627014387	female	42	Gynecology	20201217	positive	1014174971
5306-0628003973	female	57	Gynecology	20200508	positive	1011896052
5327-2723006056	female	63	Reproductive Gynecology	20200917	positive	1013267794
5327-2726007743	female	64	Gynecology	20201215	positive	1014138328
5330-3024009250	female	53	Gynecology	20201128	positive	1013978388
5335-5354236623	female	37	Gynecology	20200813	positive	1012907911
LS10283750	female	58		20201217	positive	7100746602
				20200408	positive	7100666007
1000153397	female	23	Reproductive Gynecology	20191029	positive	1010469210
1000903240	female	31	Gynecology	20191219	positive	1010909081
1000913093	female	58	Reproductive Gynecology	20191012	positive	1010322637
1001224690	female	25	Reproductive Gynecology	20191112	positive	1010583032
1001269421	female	39	Gynecology	20191228	positive	1010987243
1001605300	female	23	Reproductive Gynecology	20191115	positive	1010618847
1001623603	female	34	Reproductive Gynecology	20191214	positive	1010865667

## Sheet: HPV43+
Patient ID	Patient Gender	Patient Age	Department	Test Date	Result	Barcode
0103092404	female	72	Reproductive Gynecology	20240207	positive	1028319834
1000200025	female	39	Gynecology	20240327	positive	1028931961
1000209410	female	41	Gynecology	20240301	positive	1028568195
1000313842	female	58	Gynecology	20240306	positive	1028633482
1000597823	female	41	Gynecology	20240229	positive	1028548745
1000708670	female	42	Gynecology	20240712	positive	1030383561
1001256943	female	61	Gynecology	20240717	positive	1030456461
1001272465	female	32	Gynecology	20240725	positive	1030584541
1001453602	female	30	Gynecology	20240227	positive	1028516733
1001729541	female	26	Gynecology	20240326	positive	1028912013
1001760978	female	56	Gynecology	20240604	positive	1029845601
1001872194	female	36	Reproductive Gynecology	20240322	positive	1028868141
1002064949	female	32	Reproductive Gynecology	20240227	positive	1028520704
1002318607	female	32	Gynecology	20240528	positive	1029756618
1002340872	female	34	Gynecology	20240515	positive	1029576782
1002444213	female	39	Gynecology	20240117	positive	1028051218
1002873097	female	50	Gynecology	20240223	positive	1028471590
1003422659	female	31	Gynecology	20240511	positive	1029526043
1003526364	female	19	Gynecology	20240326	positive	1028909679
1003549947	female	41	Gynecology	20240705	positive	1030280931
1003569316	female	49	Gynecology	20240222	positive	1028459803
1003774359	female	49	Gynecology	20240313	positive	1028730465
1004067043	female	29	Gynecology	20240410	positive	1029108173
1004078045	female	58	Reproductive Gynecology	20240104	positive	1027889731
1004101295	female	24	Gynecology	20240508	positive	1029475693
1004153508	female	41	Gynecology	20240301	positive	1028567463
1004168445	female	27	Gynecology	20240311	positive	1028694337
1004178524	female	49	Gynecology	20240319	positive	1028812574
1004178524	female	50	Gynecology	20240625	positive	1030135223
1004190048	female	19	Gynecology	20240322	positive	1028868664
1004253419	female	61	Gynecology	20240508	positive	1029476328
1004270898	female	61	Reproductive Gynecology	20240618	positive	1030031270
1004284178	female	48	Reproductive Gynecology	20240524	positive	1029711455
1004327006	female	34	Gynecology	20240628	positive	1030190598
1004394953	female	32	Gynecology	20240731	positive	1030675793
0000098113	female	54	Reproductive Gynecology	20230520	positive	1025116265
0103160442	female	38	Reproductive Gynecology	20230215	positive	1023953597
1000023256	female	40	Reproductive Gynecology	20230517	positive	1025076229
1000027426	female	58	Gynecology	20231122	positive	1027366773
1000055212	female	45	Gynecology	20230330	positive	1024499838
1000313842	female	57	Gynecology	20230308	positive	1024221343
1000325457	female	31	Gynecology	20230530	positive	1025230185
1000462873	female	60	Gynecology	20230628	positive	1025587465
1000496190	female	54	Gynecology	20230517	positive	1025074674
1000629223	female	35	Reproductive Gynecology	20230617	positive	1025461512
1000669862	female	36	Gynecology	20230222	positive	1024046599
1000725700	female	53	Gynecology	20231014	positive	1026895140
1000803468	female	34	Reproductive Gynecology	20231109	positive	1027212813
1000822914	female	25	Reproductive Gynecology	20231212	positive	1027615191
1001170572	female	40	Reproductive Gynecology	20230215	positive	1023950778
1001252482	female	54	Gynecology	20230207	positive	1023833237
1001252482	female	54	Gynecology	20230516	positive	1025048036
1001256943	female	61	Gynecology	20231128	positive	1027445267
1001280856	female	58	Gynecology	20230131	positive	1023751786
1001305458	female	33	Reproductive Gynecology	20230822	positive	1026297018
1001404773	female	43	Gynecology	20230410	positive	1024617597
1001533057	female	29	Gynecology	20230905	positive	1026458246
1001533224	female	29	Reproductive Gynecology	20230817	positive	1026236831
1001622716	female	45	Gynecology	20230628	positive	1025586906
1001710620	female	49	Gynecology	20230905	positive	1026466067
1001760978	female	55	Gynecology	20231206	positive	1027545924
1001881208	female	52	Reproductive Gynecology	20230322	positive	1024395888
1001881208	female	53	Reproductive Gynecology	20230920	positive	1026644700
1001964265	female	54	Gynecology	20230411	positive	1024627843
1001988697	female	52	Gynecology	20230131	positive	1023752577
1002042721	female	36	Gynecology	20231101	positive	1027110334
1002058683	female	42	Gynecology	20230223	positive	1024058957
1002068109	female	46	Gynecology	20230308	positive	1024216140
1002087009	female	44	Gynecology	20230704	positive	1025646067
1002124736	female	58	Gynecology	20231121	positive	1027355509
1002150751	female	30	Gynecology	20230201	positive	1023760028
1002170232	female	21	Gynecology	20230111	positive	1023577038
1002465225	female	56	Gynecology	20230111	positive	1023583678
1002579685	female	50	Gynecology	20230516	positive	1025056752
1002619634	female	47	Gynecology	20230129	positive	1023719355
1002687395	female	50	Gynecology	20230323	positive	1024415317
1002709589	female	37	Gynecology	20230207	positive	1023836860
1002793922	female	30	Gynecology	20230811	positive	1026170762
1002820566	female	44	Reproductive Gynecology	20230104	positive	1023498006
1002931019	female	36	Reproductive Gynecology	20230602	positive	1025280017
1003003785	female	47	Gynecology	20230616	positive	1025444945
1003061573	female	58	Gynecology	20230222	positive	1024046773
1003080832	female	31	Gynecology	20230412	positive	1024656665
1003131135	female	34	Gynecology	20230926	positive	1026713828
1003143849	female	27	Gynecology	20230927	positive	1026731572
1003349780	female	49	Gynecology	20230214	positive	1023933676
1003349780	female	50	Gynecology	20230822	positive	1026291856
1003370292	female	62	Gynecology	20230405	positive	1024572112
1003409102	female	30	Reproductive Gynecology	20230211	positive	1023900745
1003534242	female	61	Gynecology	20230509	positive	1024962858
1003556230	female	47	Gynecology	20230110	positive	1023567918
1003592116	female	47	Gynecology	20230726	positive	1025950689
1003599283	female	26	Reproductive Gynecology	20230218	positive	1023997931
1003617140	female	24	Gynecology	20230506	positive	1024921475
1003629710	female	57	Gynecology	20230309	positive	1024237874
1003647391	female	25	Reproductive Gynecology	20230322	positive	1024395630
1003660104	female	28	Reproductive Gynecology	20231121	positive	1027359737
1003671472	female	25	Gynecology	20230428	positive	1024863767
1003701983	female	20	Gynecology	20230424	positive	1024806515
1003715132	female	31	Reproductive Gynecology	20230728	positive	1025986823
1003718357	female	20	Gynecology	20231009	positive	1026824739
1003729882	female	18	Gynecology	20230516	positive	1025061086
1003735613	female	43	Reproductive Gynecology	20230517	positive	1025077620
1003736628	female	32	Reproductive Gynecology	20230518	positive	1025086951
1003736845	female	32	Gynecology	20230519	positive	1025106805
1003740272	female	23	Gynecology	20230525	positive	1025179110
1003751771	female	44	Reproductive Gynecology	20230531	positive	1025248923
1003755205	female	32	Gynecology	20230628	positive	1025584955
1003760428	female	27	Gynecology	20230613	positive	1025403653
1003765826	female	26	Gynecology	20230821	positive	1026279717
1003769813	female	51	Reproductive Gynecology	20230613	positive	1025407332
1003772257	female	33	Gynecology	20230629	positive	1025600426
1003787759	female	54	Gynecology	20230628	positive	1025586935
1003807355	female	60	Gynecology	20231108	positive	1027203293
1003865847	female	61	Gynecology	20230809	positive	1026132620
1003872785	female	33	Gynecology	20230816	positive	1026227792
1003881988	female	32	Gynecology	20230912	positive	1026547448
1003919703	female	22	Reproductive Gynecology	20230913	positive	1026561139
1003925644	female	39	Gynecology	20231101	positive	1027104867
1003944533	female	55	Gynecology	20230927	positive	1026732106
1003986015	female	51	Gynecology	20231101	positive	1027113758
1004066716	female	26	Gynecology	20231227	positive	1027804265
5300-0000330488	female	50	Gynecology	20230909	positive	1026521314
5328-2800000614	female	53	Reproductive Gynecology	20230721	positive	1025889320
0101299999	female	39	Gynecology	20220408	positive	1019647157
0101309988	female	31	Gynecology	20220104	positive	1018497306
0102321094	female	32	Gynecology	20220409	positive	1019665631
0102327887	female	34	Reproductive Gynecology	20220113	positive	1018612535
0102529180	female	32	Gynecology	20220317	positive	1019395888
0103149178	female	62	Gynecology	20220621	positive	1020638407
0103160442	female	37	Reproductive Gynecology	20221105	positive	1022784650
0112162769	female	45	Gynecology	20220526	positive	1020283328
0112307910	female	32	Gynecology	20220120	positive	1018696117
0112314539	female	61	Gynecology	20220427	positive	1019892184
0124007321	female	47	Gynecology	20220601	positive	1020363381
0153026949	female	49	Gynecology	20220428	positive	1019914817
1000057286	female	48	Gynecology	20220130	positive	1018807224
1000075891	female	30	Reproductive Gynecology	20220526	positive	1020279878
1000080242	female	44	Gynecology	20220312	positive	1019338175
1000120028	female	32	Gynecology	20220323	positive	1019462595
1000152947	female	55	Gynecology	20220510	positive	1020063906
1000154452	female	31	Gynecology	20220224	positive	1019105421
1000161703	female	38	Gynecology	20220614	positive	1020533557
1000313842	female	56	Gynecology	20220712	positive	1020941709
1000365313	female	25	Gynecology	20220309	positive	1019290479
1000393900	female	32	Gynecology	20220524	positive	1020253388
1000476003	female	56	Gynecology	20220222	positive	1019078868
1000532849	female	32	Gynecology	20221118	positive	1023002593
1000534382	female	55	Gynecology	20220622	positive	1020652404
1000597823	female	39	Gynecology	20220206	positive	1018837368
1000620299	female	24	Gynecology	20220303	positive	1019212755
1000624610	female	35	Gynecology	20220818	positive	1021546706
1000670238	female	44	Gynecology	20220126	positive	1018771560
1000705282	female	46	Gynecology	20220509	positive	1020036439
1000710394	female	47	Gynecology	20220330	positive	1019544310
1000721050	female	57	Gynecology	20220409	positive	1019658156
1000724773	female	37	Gynecology	20221006	positive	1022334563
1000878805	female	29	Reproductive Gynecology	20220526	positive	1020280337
1000933220	female	29	Gynecology	20220420	positive	1019804191
1000982457	female	45	Gynecology	20220629	positive	1020754998
1000990745	female	60	Gynecology	20220726	positive	1021166426
1001005262	female	35	Gynecology	20220519	positive	1020187481
1001040700	female	38	Gynecology	20220104	positive	1018494661
1001099347	female	29	Gynecology	20220330	positive	1019549878
1001099347	female	29	Gynecology	20220915	positive	1021998806
1001115417	female	38	Gynecology	20220113	positive	1018610642
1001133539	female	24	Gynecology	20220623	positive	1020674612
1001151098	female	39	Gynecology	20220621	positive	1020633242
1001152101	female	43	Gynecology	20220224	positive	1019107682
1001158465	female	54	Reproductive Gynecology	20220223	positive	1019091053
1001170572	female	40	Reproductive Gynecology	20220708	positive	1020887487
1001258828	female	25	Gynecology	20220219	positive	1019043737
1001277765	female	27	Reproductive Gynecology	20220216	positive	1018994766
1001375976	female	21	Gynecology	20220528	positive	1020315113
1001382259	female	48	Gynecology	20220506	positive	1020008542
1001429204	female	35	Reproductive Gynecology	20221008	positive	1022366387
1001501282	female	40	Gynecology	20220617	positive	1020585645
1001573938	female	36	Reproductive Gynecology	20220308	positive	1019271656
1001583923	female	39	Gynecology	20220520	positive	1020207305
1001601906	female	39	Gynecology	20220701	positive	1020788183
1001606786	female	23	Gynecology	20220311	positive	1019324032
1001647865	female	21	Gynecology	20220425	positive	1019866282
1001754886	female	35	Gynecology	20220128	positive	1018791902
1001769361	female	35	Gynecology	20220329	positive	1019524217
1001812436	female	58	Gynecology	20220125	positive	1018754102
1001812436	female	58	Gynecology	20220915	positive	1022006492
1001868741	female	40	Gynecology	20220122	positive	1018720232
1001868923	female	37	Gynecology	20220419	positive	1019776997
1001881656	female	23	Gynecology	20220209	positive	1018892728
1001887386	female	34	Gynecology	20221227	positive	1023427886
1001988697	female	51	Gynecology	20220119	positive	1018683163
1002024943	female	29	Reproductive Gynecology	20220831	positive	1021759355
1002058683	female	42	Gynecology	20221110	positive	1022861460
1002068109	female	46	Gynecology	20221122	positive	1023059261
1002089339	female	36	Gynecology	20220331	positive	1019559180
1002123395	female	31	Gynecology	20220224	positive	1019108781
1002124434	female	26	Gynecology	20220421	positive	1019816281
1002128435	female	39	Gynecology	20220616	positive	1020567578
1002143768	female	21	Gynecology	20220112	positive	1018591845
1002199097	female	23	Gynecology	20220506	positive	1020002531
1002209207	female	27	Gynecology	20220315	positive	1019364855
1002247230	female	30	Gynecology	20220408	positive	1019643835
1002259372	female	50	Reproductive Gynecology	20220616	positive	1020570890
1002312296	female	27	Gynecology	20220702	positive	1020798412
1002397878	female	53	Gynecology	20220106	positive	1018527589
1002397878	female	53	Gynecology	20220331	positive	1019559501
1002400818	female	31	Gynecology	20220630	positive	1020777136
1002438466	female	26	Gynecology	20220228	positive	1019151665
1002506754	female	25	Gynecology	20220509	positive	1020039195
1002536362	female	27	Gynecology	20220607	positive	1020437746
1002539993	female	28	Gynecology	20220628	positive	1020738487
1002552881	female	39	Gynecology	20220114	positive	1018620179
1002554203	female	34	Gynecology	20220211	positive	1018920739
1002569686	female	71	Gynecology	20220809	positive	1021386248
1002587566	female	24	Gynecology	20220423	positive	1019846905
1002593613	female	53	Gynecology	20220217	positive	1019007636
1002643802	female	28	Reproductive Gynecology	20220726	positive	1021173649
1002708819	female	43	Gynecology	20220211	positive	1018921662
1002715699	female	29	Reproductive Gynecology	20220113	positive	1018610407
1002733911	female	26	Gynecology	20220223	positive	1019089924
1002734897	female	21	Gynecology	20221022	positive	1022557805
1002747469	female	26	Gynecology	20220413	positive	1019708408
1002785323	female	18	Gynecology	20220512	positive	1020097453
1002789207	female	40	Gynecology	20220115	positive	1018640631
1002789247	female	24	Gynecology	20220111	positive	1018580353
1002793178	female	37	Gynecology	20220518	positive	1020175367
1002793922	female	28	Gynecology	20220112	positive	1018600412
1002807240	female	44	Gynecology	20220119	positive	1018685541
1002817968	female	27	Gynecology	20220217	positive	1019012675
1002822798	female	44	Gynecology	20220127	positive	1018783465
1002834634	female	47	Gynecology	20220211	positive	1018924891
1002846566	female	34	Gynecology	20220214	positive	1018951444
1002860432	female	43	Gynecology	20220218	positive	1019019773
1002878852	female	37	Reproductive Gynecology	20220511	positive	1020080889
1002904163	female	27	Gynecology	20220322	positive	1019449723
1002909395	female	25	Gynecology	20220331	positive	1019558423
1002918267	female	31	Gynecology	20221004	positive	1022280925
1002924673	female	50	Gynecology	20220419	positive	1019777167
1002934661	female	24	Gynecology	20220624	positive	1020692168
1002935339	female	32	Gynecology	20220402	positive	1019586640
1002941157	female	36	Gynecology	20220428	positive	1019914076
1002945175	female	34	Gynecology	20220708	positive	1020888820
1002946822	female	29	Gynecology	20220831	positive	1021760118
1002969615	female	25	Gynecology	20221213	positive	1023333642
1002979072	female	49	Gynecology	20220415	positive	1019736605
1002991758	female	32	Gynecology	20220623	positive	1020671960
1002991917	female	25	Reproductive Gynecology	20220422	positive	1019827337
1003003335	female	32	Gynecology	20220923	positive	1022140964
1003017572	female	81	Gynecology	20220506	positive	1019999328
1003030163	female	24	Gynecology	20220514	positive	1020129360
1003046263	female	28	Gynecology	20221123	positive	1023092836
1003049828	female	36	Gynecology	20220525	positive	1020264889
1003091835	男	31	Gynecology	20220607	positive	1020436016
1003128142	female	49	Gynecology	20220622	positive	1020658690
1003131284	female	30	Gynecology	20220701	positive	1020787357
1003135955	female	43	Reproductive Gynecology	20220629	positive	1020752091
1003157952	female	45	Gynecology	20220708	positive	1020891128
1003165751	female	41	Gynecology	20220809	positive	1021395746
1003187939	female	19	Gynecology	20220715	positive	1021003312
1003195900	female	67	Reproductive Gynecology	20220823	positive	1021636226
1003268323	female	22	Gynecology	20221005	positive	1022321896
1003268955	female	21	Gynecology	20221010	positive	1022381051
1003271371	female	25	Reproductive Gynecology	20220811	positive	1021427753
1003319816	female	31	Gynecology	20220902	positive	1021795160
1003324290	female	28	Gynecology	20220915	positive	1022006175
1003364369	female	24	Gynecology	20220914	positive	1021979472
1003370292	female	61	Gynecology	20221021	positive	1022542087
1003410866	female	52	Gynecology	20221006	positive	1022333738
1003416305	female	23	Gynecology	20221115	positive	1022945409
1003431641	female	31	Reproductive Gynecology	20221021	positive	1022541542
1003435854	female	27	Gynecology	20221102	positive	1022719873
1003436614	female	47	Gynecology	20221029	positive	1022667690
1003440189	female	51	Gynecology	20221101	positive	1022698718
1003482994	female	53	Gynecology	20221117	positive	1022981207
1003507583	female	37	Gynecology	20221202	positive	1023228020
1003510234	female	49	Gynecology	20221208	positive	1023292378
1003525721	female	22	Gynecology	20221210	positive	1023315299
1003545669	female	31	Gynecology	20221228	positive	1023443164
5300-0000801151	female	32	Reproductive Gynecology	20220302	positive	1019191633
5306-0601011507	female	59	Gynecology	20220615	positive	1020555580
5325-2500011113	female	39	Gynecology	20220728	positive	1021209899
0000157565	female	40	Gynecology	20210821	positive	1016940152
0102615995	female	35	Reproductive Gynecology	20210825	positive	1016990693
0103165060	female	52	Gynecology	20210317	positive	1015091434
0103165060	female	53	Gynecology	20210623	positive	1016207416
0103165060	female	53	Gynecology	20210902	positive	1017081494
0103413287	female	35	Gynecology	20210616	positive	1016130245
0111245219	female	32	Reproductive Gynecology	20211222	positive	1018354570
0111299795	female	26	Gynecology	20210514	positive	1015763944
0113015100	female	55	Gynecology	20210205	positive	1014685401
1000013591	female	50	Gynecology	20210219	positive	1014779992
1000028998	female	39	Gynecology	20210824	positive	1016970351
1000053118	female	36	Gynecology	20210831	positive	1017054720
1000076475	female	51	Gynecology	20210324	positive	1015185224
1000080242	female	43	Gynecology	20210721	positive	1016553377
1000086610	female	32	Gynecology	20210727	positive	1016619229
1000105618	female	50	Gynecology	20210224	positive	1014841958
1000105618	female	50	Gynecology	20210510	positive	1015704809
1000110910	female	43	Gynecology	20210609	positive	1016059189
1000153385	female	48	Gynecology	20210526	positive	1015892735
1000153385	female	48	Gynecology	20211230	positive	1018448712
1000159428	female	26	Gynecology	20210729	positive	1016653658
1000161703	female	37	Gynecology	20211014	positive	1017545728
1000174407	female	45	Gynecology	20210831	positive	1017058547
1000186559	female	43	Gynecology	20211211	positive	1018226877
1000189315	female	31	Reproductive Gynecology	20211225	positive	1018394989
1000191083	female	24	Gynecology	20210914	positive	1017220042
1000197878	female	25	Gynecology	20210604	positive	1016007602
1000232185	female	27	Gynecology	20210907	positive	1017142061
1000234899	female	49	Gynecology	20210715	positive	1016474452
1000252602	female	50	Gynecology	20211020	positive	1017621128
1000256864	female	29	Gynecology	20210929	positive	1017400062
1000292869	female	22	Gynecology	20210528	positive	1015927279
1000292869	female	22	Gynecology	20211204	positive	1018144637
1000321296	female	47	Gynecology	20210604	positive	1016007114
1000351728	female	38	Gynecology	20210427	positive	1015577237
1000401368	female	25	Gynecology	20210318	positive	1015116912
1000451414	female	25	Gynecology	20210810	positive	1016798592
1000534354	female	64	Gynecology	20210402	positive	1015295480
1000616398	female	50	Gynecology	20210305	positive	1014957113
1000616398	female	50	Gynecology	20210611	positive	1016084133
1000675689	female	41	Gynecology	20210325	positive	1015196759
1000695027	female	27	Reproductive Gynecology	20211116	positive	1017939543
1000703315	female	36	Gynecology	20210518	positive	1015799460
1000718454	female	63	Gynecology	20210413	positive	1015411655
1000760609	female	26	Gynecology	20210119	positive	1014498300
1000760609	female	26	Gynecology	20210602	positive	1015982529
1000821390	female	44	Gynecology	20210323	positive	1015170379
1000829213	female	47	Gynecology	20211105	positive	1017815417
1000873205	female	28	Gynecology	20210325	positive	1015200637
1000878215	female	23	Reproductive Gynecology	20210715	positive	1016483476
1000882789	female	52	Gynecology	20210623	positive	1016213286
1000883694	female	52	Gynecology	20210208	positive	1014711123
1000884032	female	48	Gynecology	20211030	positive	1017744614
1000884616	female	40	Gynecology	20210521	positive	1015848817
1000909382	female	31	Reproductive Gynecology	20211010	positive	1017497273
1000988790	female	33	Gynecology	20210521	positive	1015843675
1001029300	female	43	Gynecology	20211130	positive	1018094600
1001037539	female	29	Gynecology	20210121	positive	1014524347
1001048200	female	32	Gynecology	20211218	positive	1018311918
1001085485	female	33	Gynecology	20210607	positive	1016028893
1001112820	female	57	Gynecology	20210622	positive	1016198808
1001135170	female	47	Gynecology	20210508	positive	1015691242
1001137188	female	48	Gynecology	20210908	positive	1017160693
1001193537	female	40	Gynecology	20210316	positive	1015076486
1001199354	female	27	Reproductive Gynecology	20210309	positive	1014996509
1001252827	female	32	Gynecology	20210317	positive	1015093964
1001273843	female	34	Gynecology	20210626	positive	1016253569
1001273959	female	41	Reproductive Gynecology	20210410	positive	1015386312
1001283367	female	55	Reproductive Gynecology	20210507	positive	1015668221
1001399892	female	27	Gynecology	20211019	positive	1017604455
1001415326	female	42	Gynecology	20210914	positive	1017222751
1001488332	female	58	Gynecology	20210811	positive	1016815425
1001500828	female	48	Gynecology	20210414	positive	1015429111
1001507232	female	37	Gynecology	20210318	positive	1015115130
1001536395	female	56	Reproductive Gynecology	20211125	positive	1018046584
1001572801	female	26	Gynecology	20210203	positive	1014663814
1001621639	female	70	Gynecology	20210510	positive	1015704839
1001627975	female	32	Gynecology	20210127	positive	1014581607
1001637992	female	41	Gynecology	20211209	positive	1018194805
1001640960	female	27	Gynecology	20211102	positive	1017765782
1001665589	female	48	Gynecology	20210220	positive	1014786496
1001669831	female	29	Gynecology	20211021	positive	1017634325
1001704910	female	48	Gynecology	20211208	positive	1018189631
1001729209	female	40	Gynecology	20211218	positive	1018310436
1001754503	female	30	Gynecology	20210519	positive	1015821584
1001769361	female	34	Gynecology	20210924	positive	1017334808
1001808805	female	63	Gynecology	20210318	positive	1015113967
1001831710	female	23	Gynecology	20210612	positive	1016096117
1001831710	female	23	Gynecology	20211126	positive	1018052036
1001837232	female	17	Gynecology	20210309	positive	1014999242
1001930839	female	34	Gynecology	20210914	positive	1017226808
1001935994	female	39	Gynecology	20210616	positive	1016121732
1001941763	female	23	Gynecology	20210811	positive	1016811307
1001977822	female	29	Gynecology	20210219	positive	1014772961
1001978215	female	36	Gynecology	20210401	positive	1015282503
1001985031	female	69	Gynecology	20210203	positive	1014662098
1001988697	female	50	Gynecology	20210709	positive	1016400969
1001996099	female	42	Gynecology	20210108	positive	1014391481
1002001892	female	47	Gynecology	20210818	positive	1016901306
1002063240	female	25	Gynecology	20210304	positive	1014945009
1002063240	female	26	Gynecology	20210630	positive	1016296309
1002065777	female	33	Gynecology	20210317	positive	1015100443
1002085194	female	51	Gynecology	20210220	positive	1014791889
1002114819	female	27	Reproductive Gynecology	20211102	positive	1017770898
1002121306	female	32	Gynecology	20210518	positive	1015799695
1002122805	female	25	Gynecology	20210120	positive	1014503649
1002130086	female	24	Gynecology	20210621	positive	1016179306
1002130842	female	51	Gynecology	20210408	positive	1015353972
1002130842	female	51	Gynecology	20210920	positive	1017291125
1002138344	female	23	Gynecology	20210310	positive	1015013772
1002145601	female	24	Gynecology	20210105	positive	1014351763
1002149718	female	26	Gynecology	20210108	positive	1014392451
1002150751	female	29	Gynecology	20210715	positive	1016476891
1002150751	female	29	Gynecology	20211221	positive	1018342888
1002151525	female	47	Gynecology	20210113	positive	1014439492
1002156439	female	66	Gynecology	20210113	positive	1014438786
1002156555	female	35	Gynecology	20210113	positive	1014438782
1002156707	female	27	Reproductive Gynecology	20210113	positive	1014439486
1002156832	female	23	Gynecology	20210826	positive	1016995110
1002159074	female	43	Gynecology	20210115	positive	1014457866
1002172139	female	26	Gynecology	20210223	positive	1014824120
1002178674	female	24	Gynecology	20210127	positive	1014588000
1002190410	female	38	Gynecology	20210209	positive	1014718843
1002195747	female	30	Gynecology	20210207	positive	1014702903
1002196111	female	46	Gynecology	20210207	positive	1014704027
1002199097	female	22	Gynecology	20210226	positive	1014874901
1002199097	female	22	Gynecology	20210630	positive	1016294596
1002203289	female	33	Gynecology	20211222	positive	1018349073
1002209207	female	26	Gynecology	20210219	positive	1014777761
1002210514	female	75	Gynecology	20210220	positive	1014790029
1002211920	female	30	Gynecology	20210220	positive	1014796391
1002232211	female	30	Gynecology	20210303	positive	1014927921
1002238244	female	38	Gynecology	20210607	positive	1016028036
1002244505	female	64	Gynecology	20210310	positive	1015018287
1002247230	female	29	Gynecology	20210826	positive	1017004001
1002247230	female	29	Gynecology	20211202	positive	1018114839
1002247577	female	35	Gynecology	20210312	positive	1015040384
1002258106	female	24	Gynecology	20210320	positive	1015138257
1002262309	female	38	Gynecology	20210320	positive	1015136375
1002265305	female	44	Gynecology	20210326	positive	1015209444
1002266647	female	47	Gynecology	20210323	positive	1015163789
1002277310	female	51	Gynecology	20210415	positive	1015443084
1002277310	female	52	Gynecology	20211102	positive	1017771841
1002285329	female	33	Gynecology	20210407	positive	1015335345
1002293778	female	26	Gynecology	20210408	positive	1015357402
1002302708	female	46	Gynecology	20210414	positive	1015428149
1002307200	female	24	Gynecology	20210511	positive	1015722061
1002307547	female	34	Gynecology	20211012	positive	1017521187
1002312296	female	27	Reproductive Gynecology	20211104	positive	1017796888
1002315133	female	24	Gynecology	20210427	positive	1015580630
1002318909	female	29	Gynecology	20210423	positive	1015540015
1002336007	female	32	Gynecology	20211026	positive	1017682502
1002339025	female	26	Gynecology	20210507	positive	1015676971
1002348977	female	31	Gynecology	20210513	positive	1015750148
1002358619	female	21	Gynecology	20210520	positive	1015832797
1002360275	female	35	Gynecology	20210520	positive	1015836121
1002371958	female	57	Gynecology	20211215	positive	1018267332
1002380983	female	47	Reproductive Gynecology	20211204	positive	1018140289
1002397851	female	42	Gynecology	20210922	positive	1017300813
1002398192	female	21	Gynecology	20210616	positive	1016119915
1002413065	female	14	Gynecology	20210625	positive	1016235063
1002414087	female	31	Gynecology	20210624	positive	1016230081
1002423788	female	48	Gynecology	20211116	positive	1017934335
1002426792	female	28	Gynecology	20210708	positive	1016392836
1002436547	female	29	Gynecology	20210712	positive	1016427503
1002436547	female	30	Gynecology	20211231	positive	1018470446
1002438867	female	30	Gynecology	20210709	positive	1016406365
1002472490	female	40	Gynecology	20210724	positive	1016598327
1002482459	female	35	Reproductive Gynecology	20211027	positive	1017703134
1002482629	female	29	Gynecology	20210729	positive	1016657403
1002483778	female	32	Gynecology	20210729	positive	1016658449
1002505596	female	35	Reproductive Gynecology	20210810	positive	1016792168
1002507592	female	21	Gynecology	20210811	positive	1016818022
1002530561	female	25	Reproductive Gynecology	20210821	positive	1016940655
1002531457	female	25	Gynecology	20211229	positive	1018443480
1002532191	female	30	Gynecology	20210904	positive	1017112988
1002536362	female	26	Gynecology	20210827	positive	1017013636
1002554203	female	33	Gynecology	20210901	positive	1017074727
1002555482	female	48	Reproductive Gynecology	20210902	positive	1017089182
1002561645	female	49	Gynecology	20210915	positive	1017243550
1002582314	female	34	Gynecology	20211019	positive	1017603135
1002593543	female	59	Gynecology	20210925	positive	1017351529
1002602640	female	27	Gynecology	20210929	positive	1017395760
1002603709	female	48	Gynecology	20210929	positive	1017400114
1002640075	female	27	Gynecology	20211020	positive	1017619201
1002644505	female	32	Gynecology	20211026	positive	1017687422
1002688670	female	36	Gynecology	20211119	positive	1017974952
1002700364	female	49	Gynecology	20211124	positive	1018032856
1002708174	female	24	Gynecology	20211215	positive	1018273780
1002708814	female	27	Gynecology	20211130	positive	1018089415
1002715415	female	29	Gynecology	20211202	positive	1018119378
1002719922	female	17	Reproductive Gynecology	20211217	positive	1018300827
1002720111	female	26	Gynecology	20211208	positive	1018186963
1002738942	female	22	Gynecology	20211217	positive	1018299921
1002754397	female	36	Gynecology	20211221	positive	1018341754
1002754867	female	23	Gynecology	20211221	positive	1018339762
1002777187	female	26	Gynecology	20211231	positive	1018481260
5014818662	female	41	Gynecology	20210114	positive	1014447914
5015478918	female	31	Gynecology	20210102	positive	1014324941
5300-0000204807	female	43	Gynecology	20210208	positive	1014710903
5300-0000770898	female	31	Gynecology	20211021	positive	1017631958
5300-0000803347	female	25	Gynecology	20210518	positive	1015803269
5300-5001389545	female	22	Reproductive Gynecology	20210305	positive	1014960026
5325-2525005786	female	59	Gynecology	20210525	positive	1015877058
0000098905	female	52	Gynecology	20200104	positive	1011040185
0000114938	female	50	Gynecology	20200730	positive	1012761940
0000157565	female	39	Gynecology	20201028	positive	1013646815
0101111517	female	33	Gynecology	20200120	positive	1011182458
0101294988	female	31	Gynecology	20201126	positive	1013953170
0102589426	female	28	Gynecology	20201124	positive	1013920094
0103030347	female	49	Gynecology	20201228	positive	1014277828
0103185552	female	39	Gynecology	20200925	positive	1013349526
0111210693	female	51	Gynecology	20200501	positive	1011847848
0112385686	female	25	Gynecology	20201030	positive	1013672804
1000018793	female	42	Gynecology	20201225	positive	1014257155
1000080242	female	42	Gynecology	20200508	positive	1011893875
1000086610	female	31	Gynecology	20200519	positive	1011989747
1000102086	female	55	Gynecology	20200626	positive	1012348638
1000102086	female	55	Gynecology	20201203	positive	1014028801
1000102117	female	38	Gynecology	20200430	positive	1011839439
1000105618	female	49	Gynecology	20201110	positive	1013778735
1000116059	female	51	Gynecology	20200403	positive	1011594807
1000120028	female	31	Gynecology	20200826	positive	1013046232
1000146756	female	43	Reproductive Gynecology	20201014	positive	1013499373
1000234899	female	48	Gynecology	20200715	positive	1012618640
1000291406	female	41	Reproductive Gynecology	20201012	positive	1013462277
1000305097	female	42	Gynecology	20201006	positive	1013400218
1000313768	female	49	Gynecology	20200501	positive	1011848644
1000313842	female	54	Gynecology	20200909	positive	1013190024
1000351728	female	38	Gynecology	20201107	positive	1013754524
1000362889	female	44	Gynecology	20200422	positive	1011763988
1000436856	female	56	Gynecology	20201120	positive	1013890397
1000500185	female	46	Gynecology	20201215	positive	1014140000
1000504762	female	32	Gynecology	20200925	positive	1013346575
1000509470	female	32	Gynecology	20201219	positive	1014198155
1000518168	female	28	Gynecology	20200401	positive	1011579996
1000520672	female	24	Reproductive Gynecology	20200429	positive	1011827675
1000520814	female	39	Gynecology	20200811	positive	1012874107
1000627861	female	33	Gynecology	20200313	positive	1011421024
1000643487	female	37	Gynecology	20200701	positive	1012493707
1000664132	female	34	Gynecology	20200626	positive	1012346146
1000683525	female	35	Reproductive Gynecology	20200522	positive	1012028965
1000755681	female	34	Gynecology	20200425	positive	1011797371
1000857342	female	57	Gynecology	20200417	positive	1011721112
1000857342	female	57	Gynecology	20200805	positive	1012822329
1000870215	female	31	Reproductive Gynecology	20201015	positive	1013512471
1000876712	female	35	Gynecology	20200716	positive	1012633026
1000923271	female	27	Gynecology	20201027	positive	1013625268
1000964441	female	47	Gynecology	20201119	positive	1013878542
1000987186	female	49	Gynecology	20200917	positive	1013267750
1000990081	female	35	Gynecology	20201124	positive	1013928841
1000993512	female	33	Gynecology	20200312	positive	1011416776
1001094216	female	27	Gynecology	20200901	positive	1013107567
1001114492	female	36	Reproductive Gynecology	20200827	positive	1013062156
1001120894	female	30	Reproductive Gynecology	20200725	positive	1012717157
1001151115	female	27	Gynecology	20200811	positive	1012881170
1001201885	female	21	Gynecology	20200427	positive	1011808172
1001206492	female	63	Gynecology	20201014	positive	1013494427
1001217225	female	36	Gynecology	20200910	positive	1013196941
1001251330	female	57	Gynecology	20201210	positive	1014095803
1001276221	female	29	Reproductive Gynecology	20201015	positive	1013512156
1001300746	female	30	Gynecology	20200729	positive	1012753492
1001331397	female	30	Gynecology	20200428	positive	1011813597
1001387824	female	53	Gynecology	20200109	positive	1011085267
1001499414	female	19	Gynecology	20200718	positive	1012653752
1001502921	female	39	Gynecology	20201022	positive	1013587823
1001512765	female	60	Gynecology	20200623	positive	1012323089
1001515090	female	43	Gynecology	20200402	positive	1011589577
1001515090	female	43	Gynecology	20200825	positive	1013034248
1001528709	female	44	Gynecology	20200519	positive	1011997884
1001538502	female	55	Gynecology	20200305	positive	1011367050
1001552103	female	34	Gynecology	20200529	positive	1012093250
1001557711	female	37	Gynecology	20200526	positive	1012063598
1001573938	female	34	Reproductive Gynecology	20200120	positive	1011180247
1001573938	female	34	Reproductive Gynecology	20200611	positive	1012217968
1001573938	female	35	Reproductive Gynecology	20201230	positive	1014306400
1001584815	female	50	Gynecology	20200421	positive	1011752517
1001610884	female	43	Reproductive Gynecology	20201210	positive	1014099420
1001612437	female	37	Gynecology	20200514	positive	1011951450
1001613776	female	49	Reproductive Gynecology	20200311	positive	1011407706
1001620020	female	51	Gynecology	20200306	positive	1011372870
1001627975	female	32	Gynecology	20200618	positive	1012285142
1001627975	female	32	Gynecology	20201104	positive	1013716703
1001664304	female	66	Gynecology	20200916	positive	1013251684
1001667218	female	22	Gynecology	20200106	positive	1011046450
1001671028	female	40	Gynecology	20200109	positive	1011081314
1001671566	female	34	Gynecology	20200425	positive	1011794260
1001677909	female	42	Reproductive Gynecology	20200428	positive	1011818390
1001678254	female	44	Gynecology	20200925	positive	1013349597
1001679963	female	34	Gynecology	20201123	positive	1013909303
1001704626	female	27	Gynecology	20200630	positive	1012476045
1001711722	female	36	Gynecology	20200312	positive	1011417019
1001712012	female	63	Gynecology	20200312	positive	1011416798
1001716051	female	36	Gynecology	20200318	positive	1011462268
1001734307	female	19	Gynecology	20200403	positive	1011595209
1001735681	female	28	Gynecology	20200617	positive	1012274140
1001741133	female	36	Gynecology	20201215	positive	1014141910
1001753830	female	33	Gynecology	20200415	positive	1011698954
1001753830	female	33	Gynecology	20200718	positive	1012646617
1001757055	female	33	Gynecology	20200417	positive	1011721148
1001765191	female	28	Gynecology	20200424	positive	1011784639
1001770378	female	28	Gynecology	20200428	positive	1011818389
1001771176	female	36	Gynecology	20200522	positive	1012033161
1001771615	female	43	Gynecology	20200429	positive	1011829298
1001771863	female	22	Gynecology	20200429	positive	1011829813
1001773711	female	31	Gynecology	20200527	positive	1012072301
1001781372	female	32	Gynecology	20200507	positive	1011886794
1001783479	female	44	Gynecology	20200509	positive	1011907710
1001787213	female	22	Gynecology	20200519	positive	1011992838
1001799782	female	26	Gynecology	20200520	positive	1012011704
1001815861	female	57	Gynecology	20200605	positive	1012164048
1001815861	female	57	Gynecology	20201014	positive	1013493757
1001817214	female	46	Gynecology	20200602	positive	1012127518
1001819482	female	24	Gynecology	20200610	positive	1012208184
1001823128	female	31	Gynecology	20200609	positive	1012193946
1001824341	female	53	Gynecology	20200611	positive	1012219748
1001825827	female	27	Gynecology	20200610	positive	1012208569
1001833334	female	41	Gynecology	20200613	positive	1012238780
1001838143	female	28	Gynecology	20200618	positive	1012286682
1001838143	female	28	Gynecology	20200915	positive	1013240629
1001846333	female	30	Gynecology	20200623	positive	1012323663
1001853618	female	27	Gynecology	20200629	positive	1012371198
1001855961	female	32	Gynecology	20200701	positive	1012488184
1001869455	female	26	Gynecology	20200710	positive	1012573169
1001870954	female	26	Gynecology	20200711	positive	1012582134
1001911754	female	41	Gynecology	20200806	positive	1012835677
1001916612	female	39	Gynecology	20200814	positive	1012924391
1001925376	female	50	Gynecology	20200818	positive	1012956763
1001929364	female	33	Gynecology	20201012	positive	1013464458
1001935175	female	47	Gynecology	20200818	positive	1012953015
1001937688	female	47	Reproductive Gynecology	20200826	positive	1013045674
1001963795	female	50	Gynecology	20200901	positive	1013107949
1001972289	female	57	Gynecology	20200908	positive	1013171905
1001980234	female	23	Gynecology	20200915	positive	1013240243
1002000060	female	33	Gynecology	20200926	positive	1013359560
1002001892	female	46	Gynecology	20201020	positive	1013560577
1002004608	female	23	Gynecology	20200929	positive	1013384301
1002011564	female	25	Reproductive Gynecology	20201125	positive	1013942814
1002017492	female	23	Gynecology	20201020	positive	1013560234
1002033493	female	44	Gynecology	20201028	positive	1013641358
1002046755	female	42	Gynecology	20201030	positive	1013672661
1002054156	female	26	Gynecology	20201103	positive	1013707803
1002057433	female	26	Gynecology	20201106	positive	1013745647
1002077433	female	49	Gynecology	20201124	positive	1013927030
1002085568	female	42	Gynecology	20201124	positive	1013924128
1002089435	female	31	Gynecology	20201126	positive	1013950196
1002098770	female	57	Gynecology	20201209	positive	1014085051
1002104869	female	66	Gynecology	20201209	positive	1014090081
1002119418	female	60	Gynecology	20201223	positive	1014230508
1002124798	female	47	Gynecology	20201223	positive	1014236026
1002127349	female	38	Gynecology	20201222	positive	1014223319
1002132397	female	48	Gynecology	20201225	positive	1014256562
5012094742	female	30	Gynecology	20200707	positive	1012544317
5015586264	female	46	Gynecology	20201215	positive	1014139266
5300-0000235365	female	47	Gynecology	20200428	positive	1011815568
5325-2527009645	female	36	Gynecology	20200619	positive	1012292455
5325-2527009645	female	36	Gynecology	20201014	positive	1013500330
5326-2627022131	female	29	Gynecology	20200724	positive	1012709009
5327-2723014270	female	37	Gynecology	20200519	positive	1011994130
5334-3400036852	female	36	Gynecology	20200818	positive	1012952914
0129009669	female	49	Gynecology	20191212	positive	1010847196
1000102086	female	54	Gynecology	20191231	positive	1011007738
1000140394	female	32	Reproductive Gynecology	20191008	positive	1010283559
1000428151	female	49	Gynecology	20191225	positive	1010956459
1001350489	female	51	Gynecology	20191213	positive	1010857562
1001565359	female	32	Reproductive Gynecology	20191017	positive	1010370332
1001581999	female	23	Reproductive Gynecology	20191029	positive	1010469206

## Sheet: HPV 44+
Patient ID	Patient Gender	Patient Age	Department	Test Date	Result	Barcode
0129009669	female	49	Gynecology	20191212	positive	1010847196
1000102086	female	54	Gynecology	20191231	positive	1011007738
1000140394	female	32	Reproductive Gynecology	20191008	positive	1010283559
1000428151	female	49	Gynecology	20191225	positive	1010956459
1001350489	female	51	Gynecology	20191213	positive	1010857562
1001565359	female	32	Reproductive Gynecology	20191017	positive	1010370332
1001581999	female	23	Reproductive Gynecology	20191029	positive	1010469206
0102465177	female	36	Gynecology	20230808	positive	1026122026
0111245219	female	33	Reproductive Gynecology	20230118	positive	1023650612
0153013732	female	36	Gynecology	20230307	positive	1024208316
1000048533	female	60	Gynecology	20230601	positive	1025264091
1000108948	female	34	Gynecology	20230815	positive	1026213011
1000338718	female	39	Gynecology	20230223	positive	1024053145
1000567844	female	67	Gynecology	20230314	positive	1024290508
1000854091	female	51	Gynecology	20230812	positive	1026183928
1001028795	female	32	Gynecology	20230118	positive	1023648795
1001048904	female	60	Gynecology	20230506	positive	1024939553
1001279582	female	55	Gynecology	20230531	positive	1025250281
1001324270	female	42	Gynecology	20230317	positive	1024337903
1001413814	female	28	Gynecology	20230407	positive	1024593106
1001619153	female	73	Reproductive Gynecology	20230224	positive	1024070117
1002027862	female	44	Gynecology	20230608	positive	1025348296
1002177465	female	46	Gynecology	20230104	positive	1023501041
1002809212	female	28	Gynecology	20230812	positive	1026180026
1003101169	female	68	Reproductive Gynecology	20230404	positive	1024554212
1003279708	female	57	Gynecology	20230215	positive	1023949163
1003598905	female	33	Reproductive Gynecology	20230320	positive	1024362873
1003631144	female	51	Gynecology	20230620	positive	1025486340
1003680433	female	22	Reproductive Gynecology	20230420	positive	1024760821
1003687088	female	47	Reproductive Gynecology	20230413	positive	1024672584
1003724393	female	39	Gynecology	20230510	positive	1024989495
1003735082	female	65	Gynecology	20230527	positive	1025201091
1003778744	female	48	Reproductive Gynecology	20230616	positive	1025453670
1003792620	female	20	Reproductive Gynecology	20230628	positive	1025583899
1003838130	female	26	Gynecology	20230725	positive	1025936265
1003892754	female	29	Gynecology	20230823	positive	1026310821
LS10403810	female	37		20230323	positive	7101002989
	female	35		20230310	positive	7100999198
0000098356	female	55	Department of Endocrinology and Metabolism	20220125	positive	1018751960
0101104927	female	36	Gynecology	20220903	positive	1021806908
0102619649	female	34	Gynecology	20220310	positive	1019302549
0103280259	female	37	Gynecology	20220712	positive	1020944687
0111132165	female	50	Gynecology	20220502	positive	1019939712
0181113296	female	34	Gynecology	20220520	positive	1020203819
1000023803	female	34	Gynecology	20220720	positive	1021070883
1000039673	female	57	Gynecology	20220519	positive	1020193031
1000071604	female	31	Gynecology	20220517	positive	1020155773
1000071604	female	31	Gynecology	20221111	positive	1022871812
1000118966	female	41	Gynecology	20220223	positive	1019087339
1000139522	female	36	Gynecology	20220719	positive	1021053459
1000167470	female	43	Gynecology	20220110	positive	1018563286
1000175221	female	33	Gynecology	20220422	positive	1019832872
1000292235	female	41	Gynecology	20220518	positive	1020172327
1000297681	female	52	Gynecology	20220407	positive	1019626651
1000297681	female	52	Gynecology	20220908	positive	1021882802
1000322818	female	66	Gynecology	20220623	positive	1020665989
1000341451	female	42	Gynecology	20220119	positive	1018679505
1000440667	female	35	Gynecology	20220120	positive	1018700876
1000629730	female	41	Gynecology	20220519	positive	1020191526
1000638483	female	50	Gynecology	20220413	positive	1019700997
1000697180	female	50	Gynecology	20220513	positive	1020105053
1000807079	female	34	Reproductive Gynecology	20220818	positive	1021555931
1000969350	female	34	Gynecology	20221027	positive	1022627879
1001063402	female	31	Reproductive Gynecology	20220413	positive	1019711227
1001072376	female	32	Reproductive Gynecology	20220412	positive	1019691737
1001105185	female	52	Gynecology	20220217	positive	1019010955
1001105423	female	44	Gynecology	20220315	positive	1019369445
1001108745	female	44	Gynecology	20220517	positive	1020149987
1001127455	female	21	Gynecology	20220624	positive	1020691946
1001129932	female	53	Gynecology	20220130	positive	1018818190
1001159599	female	23	Gynecology	20220315	positive	1019366991
1001168519	female	48	Gynecology	20220128	positive	1018792583
1001398964	female	27	Gynecology	20220906	positive	1021852895
1001429204	female	35	Reproductive Gynecology	20221008	positive	1022366387
1001500698	female	51	Gynecology	20220524	positive	1020254972
1001533748	female	47	Gynecology	20220413	positive	1019707722
1001584426	female	63	Gynecology	20220422	positive	1019829110
1001619153	female	72	Reproductive Gynecology	20220211	positive	1018923641
1001710462	female	28	Gynecology	20221025	positive	1022588134
1001749838	female	47	Gynecology	20220727	positive	1021182776
1001796888	female	53	Gynecology	20220401	positive	1019571975
1001818050	female	60	Gynecology	20220730	positive	1021242727
1001835763	female	50	Gynecology	20220915	positive	1022005758
1001878756	female	32	Gynecology	20220226	positive	1019136620
1001887386	female	34	Gynecology	20221227	positive	1023427886
1001968129	female	33	Gynecology	20220707	positive	1020874640
1001986531	female	70	Gynecology	20220806	positive	1021353547
1002016197	female	21	Gynecology	20220823	positive	1021635658
1002019406	female	32	Gynecology	20220906	positive	1021841486
1002027862	female	43	Gynecology	20220802	positive	1021284843
1002033014	female	57	Gynecology	20220425	positive	1019860663
1002087970	female	27	Gynecology	20220219	positive	1019043939
1002096311	female	45	Gynecology	20220208	positive	1018858310
1002102206	female	35	Gynecology	20220820	positive	1021591236
1002154626	female	28	Gynecology	20220602	positive	1020375626
1002163874	female	43	Gynecology	20220413	positive	1019709765
1002228346	female	50	Gynecology	20220107	positive	1018539093
1002238090	female	29	Gynecology	20220419	positive	1019786953
1002300902	female	35	Gynecology	20220915	positive	1022002614
1002322462	female	37	Gynecology	20220906	positive	1021852866
1002328390	female	33	Gynecology	20220610	positive	1020486852
1002438466	female	26	Gynecology	20220228	positive	1019151665
1002567141	female	31	Reproductive Gynecology	20221027	positive	1022634485
1002624411	female	45	Gynecology	20220519	positive	1020193279
1002777293	female	48	Reproductive Gynecology	20220331	positive	1019562473
1002791406	female	44	Gynecology	20220113	positive	1018608645
1002796714	female	56	Gynecology	20220113	positive	1018606687
1002802661	female	38	Gynecology	20220628	positive	1020734413
1002816909	female	19	Gynecology	20220126	positive	1018771099
1002856614	female	46	Gynecology	20220216	positive	1018995280
1002856730	female	37	Gynecology	20221101	positive	1022705377
1002858009	female	28	Gynecology	20220215	positive	1018974911
1002871901	female	27	Gynecology	20220408	positive	1019649305
1002898943	female	49	Gynecology	20220526	positive	1020279802
1002918232	female	50	Gynecology	20220311	positive	1019323530
1002963565	female	32	Reproductive Gynecology	20220527	positive	1020297913
1002964740	female	59	Gynecology	20220608	positive	1020445180
1002986065	female	83	Gynecology	20220420	positive	1019799132
1003053875	female	26	Gynecology	20220630	positive	1020775558
1003158123	female	42	Gynecology	20220706	positive	1020854696
1003184778	female	25	Gynecology	20220721	positive	1021092590
1003223593	female	54	Gynecology	20220915	positive	1022006345
1003226646	female	56	Gynecology	20220803	positive	1021303393
1003325225	female	48	Gynecology	20220901	positive	1021781301
1003411022	female	33	Reproductive Gynecology	20221006	positive	1022334009
1003415871	female	53	Gynecology	20221013	positive	1022458619
1003506576	female	32	Gynecology	20221202	positive	1023229432
5300-0000108079	female	52	Gynecology	20220414	positive	1019727417
5300-0000853843	female	25	Gynecology	20220614	positive	1020532501
0101104927	female	35	Gynecology	20211208	positive	1018189235
0102166110	female	51	Gynecology	20211106	positive	1017828268
0102607331	female	32	Reproductive Gynecology	20210602	positive	1015983553
0103272274	female	35	Gynecology	20211020	positive	1017616836
0103314647	female	33	Gynecology	20210121	positive	1014518914
0111054555	female	60	Gynecology	20210208	positive	1014709744
0111071278	female	61	Gynecology	20210828	positive	1017025026
0112040212	female	51	Gynecology	20211009	positive	1017483855
0112094757	female	50	Gynecology	20210108	positive	1014392161
0112119731	female	65	Gynecology	20211015	positive	1017555712
0112158569	female	35	Gynecology	20211231	positive	1018478193
0129013849	female	39	Reproductive Gynecology	20210712	positive	1016426481
0154034422	female	31	Gynecology	20211123	positive	1018020164
0155014235	female	35	Gynecology	20211123	positive	1018012927
1000035173	female	31	Gynecology	20210520	positive	1015836232
1000039236	female	26	Gynecology	20210302	positive	1014903255
1000039673	female	57	Gynecology	20211115	positive	1017916615
1000063884	female	33	Gynecology	20210323	positive	1015164034
1000085421	female	32	Gynecology	20210318	positive	1015115677
1000086120	female	53	Gynecology	20210323	positive	1015169170
1000116487	female	27	Gynecology	20210510	positive	1015702810
1000128971	female	26	Gynecology	20210207	positive	1014702446
1000139522	female	36	Gynecology	20211221	positive	1018340998
1000167470	female	43	Gynecology	20210929	positive	1017392316
1000184958	female	32	Gynecology	20210707	positive	1016374453
1000258345	female	44	Gynecology	20210312	positive	1015045249
1000258345	female	45	Gynecology	20211014	positive	1017550096
1000266088	female	51	Gynecology	20210202	positive	1014645720
1000297681	female	51	Gynecology	20210930	positive	1017409180
1000301899	female	37	Gynecology	20211104	positive	1017795278
1000309716	female	29	Gynecology	20210111	positive	1014412463
1000338728	female	61	Gynecology	20210702	positive	1016323310
1000347089	female	41	Gynecology	20210310	positive	1015010429
1000355036	female	28	Reproductive Gynecology	20210422	positive	1015523274
1000364743	female	37	Gynecology	20210915	positive	1017242173
1000421455	female	58	Gynecology	20211014	positive	1017546776
1000428813	female	39	Gynecology	20210601	positive	1015968006
1000428813	female	39	Gynecology	20211110	positive	1017862957
1000472260	female	42	Gynecology	20210723	positive	1016585348
1000495731	female	42	Gynecology	20210507	positive	1015669776
1000516199	female	29	Gynecology	20210603	positive	1015992003
1000537038	female	57	Gynecology	20210323	positive	1015159065
1000571402	female	42	Gynecology	20210804	positive	1016724287
1000638483	female	49	Gynecology	20210820	positive	1016928979
1000655754	female	54	Gynecology	20211124	positive	1018030837
1000720442	female	52	Gynecology	20210226	positive	1014872849
1000732795	female	57	Gynecology	20211203	positive	1018131278
1000783915	female	30	Gynecology	20210320	positive	1015138336
1000807079	female	32	Reproductive Gynecology	20210311	positive	1015030419
1000807079	female	33	Reproductive Gynecology	20210925	positive	1017350534
1000819800	female	26	Reproductive Gynecology	20211001	positive	1017424367
1000869713	female	27	Gynecology	20210402	positive	1015288739
1000940991	female	36	Reproductive Gynecology	20210316	positive	1015082014
1000953015	female	42	Gynecology	20210122	positive	1014536667
1000969350	female	33	Gynecology	20210914	positive	1017217873
1000970461	female	48	Gynecology	20210122	positive	1014537264
1000970461	female	49	Gynecology	20210324	positive	1015187246
1000970461	female	49	Gynecology	20210617	positive	1016145711
1000979097	female	39	Gynecology	20210715	positive	1016481154
1000982565	female	53	Gynecology	20210602	positive	1015982367
1000982565	female	53	Gynecology	20211102	positive	1017763652
1000995822	female	31	Gynecology	20210204	positive	1014674577
1000995822	female	32	Gynecology	20211001	positive	1017423538
1001028795	female	30	Gynecology	20210226	positive	1014871365
1001028795	female	31	Gynecology	20211223	positive	1018368810
1001030582	female	39	Gynecology	20210105	positive	1014349161
1001037539	female	29	Gynecology	20210121	positive	1014524347
1001066491	female	58	Gynecology	20210303	positive	1014929095
1001092927	female	35	Gynecology	20210811	positive	1016818377
1001096570	female	22	Gynecology	20210120	positive	1014512518
1001107877	female	34	Reproductive Gynecology	20211012	positive	1017518882
1001108745	female	43	Gynecology	20210420	positive	1015486695
1001108745	female	43	Gynecology	20210803	positive	1016711500
1001108745	female	43	Gynecology	20211207	positive	1018165251
1001123848	female	55	Gynecology	20211105	positive	1017813670
1001158386	female	52	Gynecology	20210204	positive	1014673613
1001168519	female	48	Gynecology	20210521	positive	1015844645
1001169022	female	32	Gynecology	20210610	positive	1016071647
1001262779	female	77	Gynecology	20210820	positive	1016932406
1001310955	female	37	Gynecology	20211012	positive	1017516285
1001324270	female	40	Gynecology	20210623	positive	1016212188
1001324270	female	40	Gynecology	20211217	positive	1018295673
1001344483	female	27	Gynecology	20211216	positive	1018288067
1001402434	female	45	Gynecology	20211216	positive	1018281939
1001454608	female	33	Gynecology	20210702	positive	1016320905
1001504407	female	38	Gynecology	20210511	positive	1015724380
1001584426	female	62	Gynecology	20210603	positive	1015988557
1001584426	female	62	Gynecology	20210930	positive	1017405674
1001611185	female	44	Gynecology	20210123	positive	1014548067
1001617311	female	26	Reproductive Gynecology	20211231	positive	1018478466
1001619153	female	71	Reproductive Gynecology	20210106	positive	1014364476
1001619557	female	26	Gynecology	20210310	positive	1015018178
1001666675	female	48	Gynecology	20210414	positive	1015421923
1001682925	female	42	Gynecology	20210317	positive	1015101928
1001693845	female	35	Gynecology	20210320	positive	1015136488
1001704678	female	29	Gynecology	20210417	positive	1015468773
1001706476	female	43	Gynecology	20210825	positive	1016986896
1001709299	female	52	Gynecology	20210408	positive	1015358925
1001732528	female	35	Gynecology	20211022	positive	1017643202
1001762365	female	53	Gynecology	20210223	positive	1014831435
1001796888	female	52	Gynecology	20210915	positive	1017235588
1001799088	female	31	Gynecology	20210519	positive	1015819833
1001821681	female	34	Gynecology	20210605	positive	1016017736
1001837232	female	17	Gynecology	20210309	positive	1014999242
1001837232	female	17	Gynecology	20210712	positive	1016428212
1001873381	female	27	Gynecology	20211231	positive	1018477859
1001876812	female	43	Gynecology	20210130	positive	1014626672
1001880798	female	58	Gynecology	20210126	positive	1014565878
1001893921	female	24	Gynecology	20210804	positive	1016732965
1001906889	female	46	Gynecology	20210119	positive	1014490781
1001911187	female	50	Gynecology	20210728	positive	1016639621
1001911187	female	50	Gynecology	20211203	positive	1018131437
1001917913	female	30	Gynecology	20210125	positive	1014554820
1001932571	female	25	Gynecology	20210623	positive	1016217076
1001944980	female	26	Gynecology	20210508	positive	1015692881
1001965725	female	28	Gynecology	20210723	positive	1016584113
1001985123	female	26	Gynecology	20210310	positive	1015013741
1001994771	female	28	Gynecology	20210914	positive	1017227779
1002021958	female	46	Gynecology	20211027	positive	1017692446
1002028340	female	47	Gynecology	20211015	positive	1017564225
1002031454	female	59	Gynecology	20210924	positive	1017328183
1002033014	female	56	Gynecology	20210811	positive	1016808292
1002033014	female	57	Gynecology	20211207	positive	1018164002
1002054515	female	20	Gynecology	20210605	positive	1016022543
1002062632	female	45	Gynecology	20211124	positive	1018028862
1002067891	female	21	Gynecology	20210312	positive	1015042381
1002095067	female	52	Gynecology	20210316	positive	1015075228
1002101446	female	28	Gynecology	20211103	positive	1017785430
1002116804	female	56	Reproductive Gynecology	20210721	positive	1016554710
1002118027	female	56	Gynecology	20210519	positive	1015815417
1002150210	female	29	Gynecology	20210108	positive	1014393371
1002153017	female	45	Gynecology	20210514	positive	1015762755
1002156832	female	23	Gynecology	20210826	positive	1016995110
1002157545	female	32	Gynecology	20210115	positive	1014456446
1002159021	female	21	Gynecology	20211030	positive	1017740680
1002162037	female	29	Gynecology	20211020	positive	1017620052
1002166053	female	48	Gynecology	20210623	positive	1016213091
1002166826	female	36	Gynecology	20210120	positive	1014512072
1002177465	female	44	Reproductive Gynecology	20210127	positive	1014583470
1002191009	female	28	Gynecology	20211204	positive	1018142717
1002193088	female	50	Gynecology	20210703	positive	1016335166
1002193126	男	61	Geriatrics Department Cadre Section	20210825	positive	1016985670
1002198765	female	37	Gynecology	20210209	positive	1014720978
1002215772	female	26	Reproductive Gynecology	20210304	positive	1014946768
1002219475	female	47	Gynecology	20210224	positive	1014840458
1002228535	female	47	Gynecology	20210309	positive	1015001340
1002236247	female	63	Gynecology	20210305	positive	1014952491
1002245052	female	29	Gynecology	20210312	positive	1015045986
1002254987	female	55	Gynecology	20210318	positive	1015111958
1002260166	female	55	Gynecology	20210318	positive	1015115908
1002260166	female	55	Gynecology	20210810	positive	1016798443
1002260166	female	55	Gynecology	20211123	positive	1018018996
1002261518	female	51	Reproductive Gynecology	20210319	positive	1015128699
1002269616	female	32	Gynecology	20210324	positive	1015185834
1002288779	female	35	Gynecology	20210717	positive	1016506858
1002314539	female	50	Gynecology	20210707	positive	1016374843
1002323755	female	50	Gynecology	20210427	positive	1015582985
1002343908	female	30	Gynecology	20210720	positive	1016537110
1002348850	female	44	Gynecology	20210729	positive	1016661288
1002369770	female	26	Gynecology	20211202	positive	1018123229
1002386239	female	29	Gynecology	20211019	positive	1017601047
1002388995	female	29	Gynecology	20210608	positive	1016046477
1002422946	female	47	Gynecology	20210630	positive	1016296462
1002422946	female	48	Gynecology	20211027	positive	1017702178
1002423994	female	44	Gynecology	20211105	positive	1017815682
1002437039	female	37	Gynecology	20210708	positive	1016389953
1002474404	female	38	Gynecology	20210730	positive	1016676729
1002480014	female	28	Gynecology	20211012	positive	1017516218
1002486171	female	28	Gynecology	20210730	positive	1016673881
1002526184	female	43	Gynecology	20210820	positive	1016930041
1002530731	female	34	Gynecology	20210821	positive	1016943060
1002538542	female	25	Gynecology	20210825	positive	1016988831
1002557168	female	43	Gynecology	20210902	positive	1017090208
1002587212	female	57	Gynecology	20210920	positive	1017291769
1002624645	female	51	Gynecology	20211020	positive	1017615740
1002624678	female	23	Gynecology	20211012	positive	1017519098
1002630044	female	57	Gynecology	20211015	positive	1017558705
1002684137	female	37	Reproductive Gynecology	20211119	positive	1017976628
1002704860	female	41	Gynecology	20211215	positive	1018266537
1002714925	female	25	Gynecology	20211130	positive	1018091822
1002741833	female	24	Gynecology	20211222	positive	1018358684
1002744263	female	31	Gynecology	20211217	positive	1018298369
1002761527	female	48	Gynecology	20211225	positive	1018394062
1002765311	female	30	Gynecology	20211227	positive	1018408884
1002777187	female	26	Gynecology	20211231	positive	1018481260
5011303493	female	50	Gynecology	20211221	positive	1018343370
5300-0000097762	female	63	Gynecology	20211001	positive	1017423239
5300-0000123979	female	58	Gynecology	20210629	positive	1016280610
5303-0301121099	female	53	Gynecology	20210724	positive	1016596025
5306-0627003245	female	53	Reproductive Gynecology	20210715	positive	1016481571
	female	32		20210511	positive	7100792669
0101104927	female	34	Gynecology	20201118	positive	1013867940
0101220530	female	49	Gynecology	20200829	positive	1013083902
0102246238	female	43	Reproductive Gynecology	20200526	positive	1012063888
0102529174	female	31	Gynecology	20200506	positive	1011858571
0102609510	female	45	Gynecology	20200530	positive	1012107938
0103185552	female	39	Gynecology	20200925	positive	1013349526
0103252857	female	31	Gynecology	20200923	positive	1013322736
0112119731	female	64	Gynecology	20200629	positive	1012371159
0112119731	female	64	Gynecology	20200908	positive	1013169233
0127084154	female	30	Gynecology	20200506	positive	1011864958
0154023055	female	29	Gynecology	20201019	positive	1013541749
0154040791	female	35	Gynecology	20200108	positive	1011073730
1000019277	female	44	Reproductive Gynecology	20200303	positive	1011350294
1000023025	female	42	Gynecology	20200917	positive	1013267501
1000069991	female	23	Gynecology	20201217	positive	1014176745
1000085421	female	31	Gynecology	20200922	positive	1013312650
1000101848	female	47	Gynecology	20200422	positive	1011761070
1000102117	female	38	Gynecology	20200430	positive	1011839439
1000119139	female	31	Gynecology	20200909	positive	1013189822
1000157456	female	34	Gynecology	20200423	positive	1011772430
1000166461	female	33	Gynecology	20200826	positive	1013049245
1000191047	female	64	Gynecology	20200819	positive	1012968447
1000258345	female	43	Gynecology	20200811	positive	1012873776
1000263166	female	32	Gynecology	20200408	positive	1011631888
1000298788	female	49	Gynecology	20200708	positive	1012554387
1000316258	female	45	Gynecology	20200908	positive	1013172438
1000342487	female	47	Gynecology	20200102	positive	1011011466
1000342487	female	47	Gynecology	20200603	positive	1012134985
1000350913	female	28	Gynecology	20200903	positive	1013131133
1000390676	female	50	Reproductive Gynecology	20200603	positive	1012140893
1000495494	female	34	Gynecology	20201106	positive	1013738228
1000496911	female	45	Gynecology	20200107	positive	1011060519
1000505161	female	29	Gynecology	20200327	positive	1011535175
1000528174	female	44	Gynecology	20201117	positive	1013847353
1000555634	female	42	Gynecology	20200331	positive	1011567933
1000571402	female	41	Gynecology	20200825	positive	1013034834
1000597312	female	45	Gynecology	20200721	positive	1012665252
1000597312	female	45	Gynecology	20201124	positive	1013924093
1000627688	female	31	Gynecology	20200327	positive	1011537982
1000681706	female	40	Reproductive Gynecology	20200521	positive	1012021910
1000683871	female	61	Gynecology	20200108	positive	1011070165
1000685490	female	37	Gynecology	20200611	positive	1012219191
1000696556	female	35	Gynecology	20201109	positive	1013763183
1000728598	female	47	Gynecology	20200613	positive	1012235056
1000748016	female	46	Gynecology	20200103	positive	1011030923
1000783915	female	29	Gynecology	20201020	positive	1013556809
1000807079	female	32	Reproductive Gynecology	20200721	positive	1012671622
1000818779	female	44	Gynecology	20200610	positive	1012208404
1000819499	female	47	Gynecology	20200717	positive	1012640372
1000845412	female	33	Gynecology	20200406	positive	1011608521
1000862553	female	52	Gynecology	20201021	positive	1013574145
1000870215	female	31	Reproductive Gynecology	20201015	positive	1013512471
1000895177	female	33	Reproductive Gynecology	20201113	positive	1013817814
1000895765	female	41	Gynecology	20200910	positive	1013199069
1000919940	female	37	Reproductive Gynecology	20200123	positive	1011208124
1000965982	female	24	Gynecology	20201105	positive	1013732335
1000968679	female	34	Gynecology	20200630	positive	1012479470
1000982565	female	52	Gynecology	20201126	positive	1013953432
1000997852	female	29	Gynecology	20200416	positive	1011707553
1001017869	female	49	Gynecology	20201119	positive	1013877085
1001038657	female	58	Gynecology	20200324	positive	1011507737
1001070420	female	30	Gynecology	20200519	positive	1011998205
1001122612	female	41	Gynecology	20201023	positive	1013596826
1001135964	female	23	Gynecology	20200331	positive	1011567196
1001135964	female	23	Gynecology	20200908	positive	1013175184
1001137609	female	33	Gynecology	20201216	positive	1014163237
1001160305	female	37	Reproductive Gynecology	20200414	positive	1011685637
1001206993	female	30	Reproductive Gynecology	20200903	positive	1013130907
1001241843	female	37	Gynecology	20200731	positive	1012777215
1001252229	female	31	Gynecology	20200501	positive	1011849015
1001333794	female	31	Gynecology	20200418	positive	1011726879
1001400055	female	30	Reproductive Gynecology	20200319	positive	1011471961
1001402434	female	44	Reproductive Gynecology	20201230	positive	1014307347
1001411604	female	34	Gynecology	20200409	positive	1011637214
1001417117	female	30	Reproductive Gynecology	20200408	positive	1011630891
1001456730	female	34	Gynecology	20201215	positive	1014147451
1001464688	female	44	Gynecology	20200303	positive	1011351050
1001478288	female	43	Gynecology	20200103	positive	1011027648
1001504407	female	37	Gynecology	20200814	positive	1012918939
1001504407	female	37	Gynecology	20201125	positive	1013933574
1001510708	female	42	Gynecology	20200317	positive	1011449749
1001510708	female	42	Gynecology	20200818	positive	1012959027
1001514833	female	28	Gynecology	20201203	positive	1014030163
1001517141	female	26	Gynecology	20200511	positive	1011916995
1001532535	female	43	Gynecology	20200312	positive	1011415579
1001537874	female	45	Gynecology	20201223	positive	1014236397
1001540523	female	42	Gynecology	20200630	positive	1012474004
1001584848	female	27	Gynecology	20200701	positive	1012493706
1001589681	female	25	Reproductive Gynecology	20200530	positive	1012107216
1001590318	female	47	Gynecology	20200623	positive	1012322588
1001591055	female	29	Gynecology	20200530	positive	1012106918
1001604583	female	22	Gynecology	20200922	positive	1013312542
1001612343	female	50	Gynecology	20200305	positive	1011366643
1001616948	female	54	Gynecology	20200512	positive	1011929312
1001617081	female	29	Reproductive Gynecology	20200325	positive	1011519004
1001619557	female	25	Gynecology	20200707	positive	1012544300
1001620020	female	51	Gynecology	20200306	positive	1011372870
1001639221	female	35	Gynecology	20201203	positive	1014026758
1001647966	female	41	Gynecology	20201124	positive	1013925109
1001669054	female	36	Gynecology	20200313	positive	1011426422
1001700729	female	36	Gynecology	20200512	positive	1011929203
1001700830	female	43	Gynecology	20200424	positive	1011785202
1001703182	female	66	Gynecology	20200229	positive	1011337907
1001703531	female	71	Reproductive Gynecology	20200820	positive	1012988834
1001722087	female	35	Gynecology	20200717	positive	1012640179
1001723784	female	47	Gynecology	20201202	positive	1014017114
1001729567	female	43	Gynecology	20200327	positive	1011540586
1001731349	female	30	Reproductive Gynecology	20200327	positive	1011537414
1001733586	female	26	Gynecology	20200330	positive	1011554230
1001737651	female	30	Gynecology	20200403	positive	1011598993
1001741627	female	31	Gynecology	20200409	positive	1011641186
1001745304	female	48	Reproductive Gynecology	20200421	positive	1011745536
1001756513	female	28	Gynecology	20200610	positive	1012207373
1001762058	female	48	Gynecology	20200423	positive	1011774067
1001764242	female	32	Gynecology	20200424	positive	1011783556
1001769044	female	37	Gynecology	20200430	positive	1011834569
1001771615	female	43	Gynecology	20200429	positive	1011829298
1001773155	female	45	Gynecology	20200507	positive	1011883850
1001782085	female	34	Gynecology	20200508	positive	1011896341
1001788175	female	62	Gynecology	20200514	positive	1011955313
1001788877	female	56	Gynecology	20200604	positive	1012149718
1001789104	female	57	Gynecology	20200519	positive	1011995295
1001796888	female	51	Gynecology	20200519	positive	1011995895
1001796888	female	51	Gynecology	20201209	positive	1014083869
1001803385	female	25	Reproductive Gynecology	20200707	positive	1012541817
1001809531	female	66	Gynecology	20200527	positive	1012076656
1001810333	female	46	Gynecology	20200528	positive	1012087762
1001820868	female	30	Reproductive Gynecology	20200704	positive	1012521726
1001828696	female	55	Gynecology	20200610	positive	1012205991
1001847830	female	34	Gynecology	20201106	positive	1013741871
1001848133	female	19	Gynecology	20200624	positive	1012338364
1001851210	female	50	Gynecology	20200629	positive	1012365039
1001853618	female	27	Gynecology	20200629	positive	1012371198
1001853902	female	48	Gynecology	20200710	positive	1012576551
1001868757	female	44	Gynecology	20201203	positive	1014026936
1001881517	female	21	Gynecology	20200718	positive	1012652625
1001881517	female	22	Gynecology	20201229	positive	1014292291
1001888389	female	43	Gynecology	20200723	positive	1012696307
1001889778	female	50	Gynecology	20200723	positive	1012699680
1001896283	female	28	Gynecology	20201229	positive	1014289663
1001897502	female	31	Gynecology	20200729	positive	1012754706
1001899392	female	41	Gynecology	20200730	positive	1012762841
1001913713	female	39	Gynecology	20200807	positive	1012844860
1001913713	female	39	Gynecology	20201113	positive	1013818608
1001917913	female	29	Gynecology	20200811	positive	1012871656
1001918762	female	41	Gynecology	20200811	positive	1012873998
1001928363	female	41	Gynecology	20200814	positive	1012921552
1001932911	female	31	Gynecology	20200922	positive	1013311837
1001937254	female	65	Gynecology	20200818	positive	1012958307
1001940352	female	38	Gynecology	20200819	positive	1012974546
1001941321	female	46	Gynecology	20200820	positive	1012983825
1001965390	female	35	Gynecology	20200902	positive	1013120758
1001968491	female	41	Gynecology	20200904	positive	1013143489
1001973511	female	47	Reproductive Gynecology	20200915	positive	1013234153
1001983620	female	33	Gynecology	20200916	positive	1013253133
1001985508	female	30	Gynecology	20200916	positive	1013256155
1002002281	female	30	Gynecology	20201208	positive	1014069024
1002018957	female	27	Gynecology	20201014	positive	1013500758
1002024757	female	24	Gynecology	20201103	positive	1013705933
1002027905	female	34	Gynecology	20201017	positive	1013535501
1002034800	female	47	Gynecology	20201022	positive	1013585109
1002050632	female	52	Gynecology	20201103	positive	1013705479
1002052700	female	29	Gynecology	20201103	positive	1013698391
1002053249	female	55	Reproductive Gynecology	20201103	positive	1013703517
1002054771	female	37	Gynecology	20201104	positive	1013720869
1002058282	female	38	Gynecology	20201106	positive	1013740197
1002064288	female	39	Gynecology	20201110	positive	1013775485
1002067967	female	41	Gynecology	20201204	positive	1014038467
1002069158	female	47	Gynecology	20201113	positive	1013813115
1002071165	female	26	Reproductive Gynecology	20201114	positive	1013826665
1002071595	female	37	Gynecology	20201114	positive	1013829413
1002071702	female	55	Gynecology	20201119	positive	1013882501
1002089559	female	23	Reproductive Gynecology	20201126	positive	1013954897
1002089683	female	44	Gynecology	20201126	positive	1013954948
1002090607	female	41	Gynecology	20201222	positive	1014217484
1002109189	female	44	Gynecology	20201211	positive	1014115216
1002118027	female	56	Gynecology	20201215	positive	1014147824
1002128700	female	39	Gynecology	20201223	positive	1014237501
1002133633	female	50	Gynecology	20201231	positive	1014319338
1002139405	female	44	Gynecology	20201230	positive	1014308417
5300-0000017947	female	56	Gynecology	20201028	positive	1013645857
5306-0627003245	female	52	Reproductive Gynecology	20200820	positive	1012987173
5325-2502002124	female	56	Gynecology	20200414	positive	1011686623
5325-2502002124	female	56	Gynecology	20201117	positive	1013852561
5330-3000038179	female	30	Reproductive Gynecology	20201208	positive	1014073967
5335-3523023445	female	30	Reproductive Gynecology	20200806	positive	1012829259
0103248600	female	40	Reproductive Gynecology	20191225	positive	1010957541
1001152108	female	26	Reproductive Gynecology	20191102	positive	1010510735
1001278288	female	40	Gynecology	20191225	positive	1010954814
5306-0627003245	female	51	Reproductive Gynecology	20191203	positive	1010766523

## Sheet: HPV 45+
Patient ID	Patient Gender	Patient Age	Department	Test Date	Result	Barcode
0101307377	female	37	Gynecology	20240308	positive	1028668002
0103207709	female	41	Reproductive Gynecology	20240308	positive	1028670427
1000212656	female	27	Gynecology	20240510	positive	1029511504
1000438486	female	36	Gynecology	20240126	positive	1028174276
1000627810	female	35	Gynecology	20240730	positive	1030655564
1000988308	female	44	Gynecology	20240427	positive	1029345427
1001656623	female	31	Gynecology	20240607	positive	1029901852
1001796898	female	56	Gynecology	20240425	positive	1029317487
1002185892	female	42	Reproductive Gynecology	20240221	positive	1028436299
1002531693	female	50	Gynecology	20240530	positive	1029782691
1002988880	female	42	Reproductive Gynecology	20240508	positive	1029469209
1003282035	female	33	Gynecology	20240123	positive	1028126465
1003348974	female	29	Gynecology	20240116	positive	1028028750
1003457044	female	68	Gynecology	20240219	positive	1028402403
1003745471	female	30	Gynecology	20240220	positive	1028418635
1003860887	female	28	Gynecology	20240306	positive	1028628499
1004089195	female	50	Gynecology	20240117	positive	1028052750
1004301241	female	42	Gynecology	20240607	positive	1029905335
1004328715	female	66	Gynecology	20240702	positive	1030230573
1004355910	female	29	Gynecology	20240710	positive	1030348894
1004360370	female	32	Gynecology	20240720	positive	1030509828
1000212656	female	27	Gynecology	20231228	positive	1027815222
1000406676	female	29	Gynecology	20230817	positive	1026241118
1000431080	female	29	Gynecology	20230330	positive	1024505241
1000920146	female	64	Gynecology	20230908	positive	1026509361
1001222855	female	29	Gynecology	20230830	positive	1026398590
1001467943	female	28	Reproductive Gynecology	20230810	positive	1026147590
1001572017	female	28	Gynecology	20231014	positive	1026893530
1001796898	female	55	Gynecology	20231110	positive	1027223748
1001853518	female	42	Gynecology	20230921	positive	1026660339
1002185892	female	41	Reproductive Gynecology	20230721	positive	1025884935
1003282035	female	32	Gynecology	20230309	positive	1024237237
1003318934	female	41	Gynecology	20230117	positive	1023641303
1003457044	female	67	Gynecology	20230131	positive	1023747378
1003457044	female	67	Gynecology	20230719	positive	1025850737
1003487466	female	26	Reproductive Gynecology	20230418	positive	1024718910
1003555568	female	40	Gynecology	20230506	positive	1024936082
1003556230	female	47	Gynecology	20230110	positive	1023567918
1003652977	female	61	Gynecology	20230505	positive	1024908936
1003652977	female	61	Gynecology	20230628	positive	1025585761
1003716409	female	45	Gynecology	20230508	positive	1024948489
1003723780	female	32	Gynecology	20230510	positive	1024987444
1003738079	female	67	Gynecology	20230523	positive	1025143631
1003740773	female	51	Gynecology	20230531	positive	1025247235
1003772471	female	24	Gynecology	20230613	positive	1025403057
1003833797	female	17	Gynecology	20231003	positive	1026753099
0000099673	female	46	Gynecology	20220629	positive	1020749008
0112012498	female	46	Gynecology	20220922	positive	1022117957
0112155258	female	50	Gynecology	20220527	positive	1020296531
0181111718	female	45	Gynecology	20220307	positive	1019248505
1000018793	female	44	Gynecology	20220408	positive	1019644513
1000384693	female	52	Gynecology	20220526	positive	1020279557
1000471583	female	56	Gynecology	20220712	positive	1020938057
1000879374	female	42	Gynecology	20220118	positive	1018666823
1001115417	female	38	Gynecology	20220113	positive	1018610642
1001284491	female	38	Gynecology	20220217	positive	1019007876
1001705120	female	44	Gynecology	20220519	positive	1020192650
1001853518	female	41	Gynecology	20220907	positive	1021867997
1001886245	female	47	Gynecology	20220519	positive	1020187130
1002273601	female	63	Gynecology	20220105	positive	1018503065
1002322180	female	37	Gynecology	20220720	positive	1021076359
1002421393	female	46	Gynecology	20220513	positive	1020105354
1002600876	female	31	Gynecology	20220604	positive	1020395919
1002626900	female	21	Gynecology	20220618	positive	1020598132
1002626900	female	22	Gynecology	20220928	positive	1022220415
1002773372	female	32	Gynecology	20220108	positive	1018549449
1002789247	female	24	Gynecology	20220111	positive	1018580353
1002811467	female	25	Gynecology	20220125	positive	1018756176
1002934661	female	24	Gynecology	20220624	positive	1020692168
1002971142	female	38	Gynecology	20220413	positive	1019710848
1002975449	female	50	Gynecology	20220827	positive	1021706985
1003004312	female	32	Gynecology	20220428	positive	1019909806
1003092199	female	61	Gynecology	20220607	positive	1020435854
1003176631	female	41	Gynecology	20220715	positive	1021003921
1003178725	female	56	Gynecology	20220719	positive	1021054546
1003184778	female	25	Gynecology	20220721	positive	1021092590
1003223758	female	42	Gynecology	20220726	positive	1021168440
1003240313	female	45	Gynecology	20221019	positive	1022505153
1003253299	female	35	Gynecology	20220804	positive	1021324892
1003282035	female	31	Gynecology	20220817	positive	1021529364
1003382390	female	47	Gynecology	20220922	positive	1022123782
1003400221	female	41	Gynecology	20221020	positive	1022527610
1003430822	female	34	Gynecology	20221020	positive	1022525563
1003438567	female	45	Gynecology	20221025	positive	1022591439
[truncated: 81 more rows]

## Sheet: HPV51+
Patient ID	Patient Gender	Patient Age	Department	Test Date	Result	Barcode
[truncated: 1,148 more rows]

[truncated: 14 more sheets: HPV52+, HPV 66+, HPV 68+, HPV 73+, HPV 81+, HPV 31+, HPV 33+, HPV 53+, HPV 56+, HPV58+, HPV 59+, HPV 82+, HPV 83+, HPV 26+]
